# Supplementary material for: 1,1,n,n-Tetramethyl[n](2,11)teropyrenophanes (n = 7–9): a series of armchair SWCNT segments
Source: Royal Society of Chemistry journal article supplement (doi:10.1039/c3cc43268h), 2013-01-01
Supplement: c3cc43268h.pdf [file c3cc43268h.pdf]

## Supporting Information for:

### **1,1,*n,n*-Tetramethyl[*n*](2,11)teropyrenophanes (*n*=7–9): A Series of Armchair SWCNT Segments**

Bradley L. Merner, Kiran Sagar Unikela, Louise N. Dawe, David W. Thompson and Graham J. Bodwell\*

*Chemistry Department, Memorial University, St. John's, NL, Canada A1B 3X7*

#### **Contents**

|      |                                                                                                                                  |         |
|------|----------------------------------------------------------------------------------------------------------------------------------|---------|
| I.   | General Experimental Conditions, Procedures and Characterization Data                                                            | S2-S16  |
| II.  | <sup>1</sup> H and <sup>13</sup> C NMR Spectra                                                                                   | S16-S37 |
| III. | Additional Views of <b>29</b> in the Crystal and Structural Analysis of the Teropyrene System                                    | S38-S49 |
| IV.  | DFT Calculations and Cartesian Co-ordinates for 1,1, <i>n,n</i> -Tetramethyl[ <i>n</i> ](2,11)teropyrenophanes ( <i>n</i> = 6-9) | S50-S57 |

## I. General Experimental Conditions, Procedures and Characterization Data

All reactions were performed under an atmosphere of nitrogen unless otherwise indicated. Experiments involving moisture sensitive compounds were carried out using anhydrous solvents and oven-dried (120 °C) glassware. Solvents for these reactions were dried and distilled according to standard procedures. All other solvents and chemicals were used as received. Solvents were removed under reduced pressure using a rotary evaporator. Chromatographic separations were achieved using Silicycle silica gel 60, particle size 40-63  $\mu\text{m}$ . Column dimensions are recorded as height  $\times$  diameter. Thin-layer chromatography (tlc) was performed using commercially precoated plastic-backed POLYGRAM® SIL G/UV254 silica gel plates, layer thickness 200  $\mu\text{m}$ . Compounds on tlc plates were visualized using a UV lamp (254 and 365 nm). Melting points were obtained using a Fisher-Johns apparatus. Infrared (IR) spectra were recorded using neat samples on a Bruker TENSOR 27 instrument.  $^1\text{H}$  (500.133 MHz) and  $^{13}\text{C}$  (125.77 MHz) nuclear magnetic resonance (NMR) spectra were obtained from  $\text{CDCl}_3$  solutions using a Bruker Avance 500 MHz spectrometer. Chemical shifts ( $\delta$ ) are relative to internal standards: TMS ( $\delta_{\text{H}} = 0.00$  ppm) and  $\text{CDCl}_3$  ( $\delta_{\text{H}} = 7.27$  ppm;  $\delta_{\text{C}} = 77.23$  ppm), respectively.  $^1\text{H}$  NMR data are presented as follows: chemical shift ( $\delta$ , ppm), multiplicity (s = singlet, br s = broad singlet, d = doublet, br d = broad doublet, t = triplet, q = quartet, m = multiplet), coupling constants ( $J$ , Hz). Low-resolution and high-resolution mass spectrometric (MS) data were obtained using an Agilent 1100 Series LC/MSD instrument and a Waters Micromass® GCT Premier™ instrument. MS data are presented as follows: ionization mode,  $m/z$  (relative intensity), assignment (when appropriate), calculated mass and found mass for the given formula.

### 2,8-Dichloro-2,8-dimethylnonane (7)

A solution of dimethyl pimelate (**4**) (10.7 g, 56.7 mmol) in anhydrous THF (100 mL) was added dropwise over a period of 30 min to a stirred 0 °C solution of methylmagnesium bromide (3.0 M, 85 mL, 0.26 mol). After the addition was complete, the reaction mixture was heated at reflux for 12 h. The reaction mixture was cooled to room temperature and quenched by the addition of a saturated solution of ammonium chloride (100 mL). The layers were separated and the aqueous layer was extracted with ether (2  $\times$  50 mL). The combined organic layers were dried over  $\text{MgSO}_4$ , filtered and concentrated under reduced pressure to yield a white solid, which was recrystallized from heptane to give 2,8-dimethyl-2,8-nonanediol (8.76 g, 82%) as a white powder: m.p. 71–72 °C;  $^1\text{H}$  NMR (500 MHz,  $\text{CDCl}_3$ ):  $\delta$  1.72 (br s, 2H), 1.48–1.45 (m, 4H), 1.39–1.31 (m, 6H), 1.21 (s, 12H);  $^{13}\text{C}$  NMR (125.77 MHz,  $\text{CDCl}_3$ ):  $\delta$  71.12, 44.01, 30.79, 29.30, 24.41; LCMS (APCI negative)  $m/z$  187  $[\text{M}-\text{H}]^+$ ; HRMS (CI) calculated for  $\text{C}_{11}\text{H}_{25}\text{O}_2$

$[M+H]^+$  189.1855, found 189.1849. A mixture of 2,8-dimethyl-2,8-nonanediol (3.42 g, 18.2 mmol) and concentrated aqueous HCl solution (50 mL) was stirred at room temperature for 2 h. The reaction mixture was poured into a large excess of ice water (200 mL) and extracted with dichloromethane ( $3 \times 40$  mL). The combined organic extracts were washed with a saturated solution of sodium bicarbonate ( $2 \times 50$  mL), washed with brine (50 mL), dried over  $MgSO_4$ , filtered and concentrated under reduced pressure to give 2,8-dichloro-2,8-dimethylnonane (**7**) (3.80 g, 93%) as a light yellow oil, which was used subsequently without purification.  $^1H$  NMR (500 MHz,  $CDCl_3$ ):  $\delta$  1.78–1.75 (m, 4H), 1.59 (s, 12H), 1.53–1.49 (m, 4H), 1.36–1.33 (m, 2H);  $^{13}C$  NMR (125.77 MHz,  $CDCl_3$ ):  $\delta$  71.30, 46.20, 32.61, 29.96, 25.21; LCMS (APCI-positive)  $m/z$  (rel. int.) 225  $[M+H]^+$ ; no HRMS data could be obtained for this compound.

### 2,10-Dichloro-2,10-dimethylundecane (**9**)

A solution of dimethyl azelate (**6**) (10.8 g, 49.9 mmol) in anhydrous THF (100 mL) was added dropwise over a period of 30 min to a stirred 0 °C solution of methylmagnesium bromide (3.0 M, 75 mL, 0.23 mol). After the addition was complete, the reaction mixture was heated at reflux for 12 h. The reaction mixture was cooled to room temperature and quenched by the addition of a saturated solution of ammonium chloride (100 mL). The layers were separated and the aqueous layer was extracted with ether ( $3 \times 50$  mL). The combined organic layers were dried over  $MgSO_4$ , filtered and concentrated under reduced pressure to yield a white solid, which was recrystallized from heptane to give 2,10-dimethyl-2,10-undecanediol (9.05 g, 84%) as a white powder: m.p. 64–66 °C;  $^1H$  NMR (500 MHz,  $CDCl_3$ ):  $\delta$  1.52 (br s, 2H), 1.48–1.45 (m, 4H), 1.38–1.32 (m, 10H), 1.21 (s, 12H);  $^{13}C$  NMR (125.77 MHz,  $CDCl_3$ ):  $\delta$  71.21, 44.17, 30.32, 29.80, 29.41, 24.52; IR ( $cm^{-1}$ , neat): 3366, 2964, 2930, 2860, 1472, 1362; LCMS (APCI negative)  $m/z$  216 (25) 215  $[M-H]^+$ ; HRMS (CI) calculated for  $C_{13}H_{29}O_2$  ( $[M+H]^+$ ) 217.2168, found 217.2160. A mixture of 2,10-dimethyl-2,10-undecanediol (1.75 g, 8.10 mmol) and concentrated aqueous HCl solution (40 mL) was stirred at room temperature for 2 h. The reaction mixture was poured into a large excess of ice water (100 mL) and extracted with dichloromethane ( $3 \times 30$  mL). The combined organic extracts were washed with a saturated solution of sodium bicarbonate ( $2 \times 50$  mL), washed with brine (50 mL), dried over  $MgSO_4$ , filtered and concentrated under reduced pressure to give 2,10-dichloro-2,10-dimethylundecane (**9**) (1.88 g, 92%) as a light yellow oil, which was used subsequently without purification.  $^1H$  NMR (500 MHz,  $CDCl_3$ ):  $\delta$  1.79–1.75 (m, 4H), 1.58 (s, 12H), 1.48–1.44 (m, 4H), 1.31–1.25 (m, 6H);  $^{13}C$  NMR (125.77 MHz,  $CDCl_3$ ):  $\delta$  71.42, 46.32, 32.45, 29.90,

29.74, 25.01; LCMS (APCI-positive)  $m/z$  (rel. int.) 253  $[M+H]^+$ ; no HRMS data could be obtained for this compound.

### **2,8-Bis(2-pyrenyl)-2,8-dimethylnonane (10)**

Aluminum chloride (1.64 g, 12.3 mmol) was added to a stirred 0 °C solution of pyrene (6.21 g, 30.7 mmol) and 2,8-dichloro-2,8-dimethylnonane (**7**) (1.38 g, 6.14 mmol) in dichloromethane (100 mL). The resulting slurry was allowed to warm to room temperature and stirred for 4 h. The reaction was poured into ice water (200 mL) and the layers were separated. The aqueous layer was extracted with dichloromethane (2 × 100 mL) and the combined organic extracts were washed with a saturated solution of sodium bicarbonate (50 mL), washed with brine (50 mL), dried over  $MgSO_4$ , filtered and concentrated under reduced pressure. The yellow residue was subjected to column chromatography (25 × 6.5 cm; 1:9 dichloromethane/hexanes) to yield 2,8-bis(2-pyrenyl)-2,8-dimethylnonane (**10**) as a white solid (1.40 g, 41%):  $R_f$  = 0.26 (1:9 dichloromethane/hexanes); m.p. 207–209 °C (dichloromethane);  $^1H$  NMR (500 MHz,  $CDCl_3$ )  $\delta$  8.19 (d,  $J=7.5$  Hz, 4H), 8.16 (s, 4H), 8.08–8.00 (m, 10H), 1.79–1.76 (m, 4H), 1.51 (s, 12H), 1.19–1.15 (m, 2H) 1.07–1.02 (m, 4H);  $^{13}C$  NMR (125.77 MHz,  $CDCl_3$ )  $\delta$  148.09, 131.41, 131.32, 128.04, 127.56, 125.82, 125.08, 124.99, 123.25, 123.18, 45.54, 38.54, 31.35, 29.89, 25.21; LCMS (APCI-positive)  $m/z$  (rel. int.) 559 (12), 558 (47), 557 ( $[M+H]^+$ , 100); HRMS (EI) calculated for  $C_{43}H_{40}$  ( $[M]^+$ ) 556.3130, found 556.3128.

### **2,10-Bis(2-pyrenyl)-2,10-dimethylundecane (12)**

Aluminum chloride (1.78 g, 13.4 mmol) was added to a stirred 0 °C solution of pyrene (6.73 g, 33.3 mmol) and 2,10-dichloro-2,10-dimethylundecane (**9**) (1.68 g, 6.67 mmol) in dichloromethane (100 mL). The resulting slurry was allowed to warm to room temperature and stirred for 4 h. The reaction was poured into ice water (300 mL) and the layers were separated. The aqueous layer was extracted with dichloromethane (2 × 100 mL) and the combined organic extracts were washed with a saturated solution of sodium bicarbonate (50 mL), washed with brine (50 mL), dried over  $MgSO_4$ , filtered and concentrated under reduced pressure. The oily orange residue was subjected to column chromatography (25 × 6.5 cm; 1:9 dichloromethane/hexanes) to yield 2,10-bis(2-pyrenyl)-2,10-dimethylundecane (**12**) as an orange oil

(1.67 g, 43%):  $R_f = 0.28$  (1:9 dichloromethane/hexanes);  $^1\text{H NMR}$  (500 MHz,  $\text{CDCl}_3$ )  $\delta$  8.09–8.05 (m, 8H), 7.98–7.95 (m, 8H), 7.91–7.87 (m, 2H), 1.74–1.71 (m, 4H), 1.47 (s, 12H), 1.08–1.02 (m, 6H), 1.01–0.93 (m, 4H);  $^{13}\text{C NMR}$  (125.77 MHz,  $\text{CDCl}_3$ )  $\delta$  147.88, 131.14, 131.08, 127.80, 127.34, 125.64, 124.88, 124.81, 123.05, 122.97, 45.31, 38.40, 30.45, 29.72, 29.51, 24.91; LCMS (APCI-positive)  $m/z$  (rel. int.) 587 (13), 586 (49), 585 ( $[\text{M}+\text{H}]^+$ , 100), 385 (7), 384 (18), 383 ( $\text{M}-\text{C}_{16}\text{H}_{10}$ , 42); HRMS (EI) calculated for  $\text{C}_{45}\text{H}_{44}$  ( $[\text{M}]^+$ ) 584.3443, found 584.3441.

### **2,8-Bis(6-formylpyren-2-yl)-2,8-dimethylnonane (13)**

Titanium(IV) chloride (0.453 g, 2.39 mmol) was added to a stirred 0 °C solution of 2,8-bis(2-pyrenyl)-2,8-dimethylnonane (**10**) (0.531 g, 0.953 mmol) and dichloromethyl methyl ether (0.274 g, 2.39 mmol) in dichloromethane (25 mL). The cooling bath was removed and the resulting mixture was stirred at room temperature for 2 h. The reaction mixture was poured into ice water (100 mL) and the layers were separated. The aqueous layer was extracted with dichloromethane (2 × 30 mL) and the combined organic extracts were washed with a saturated solution of sodium bicarbonate (40 mL), washed with brine (40 mL), dried over  $\text{MgSO}_4$ , filtered and concentrated under reduced pressure. The solid brown residue was subjected to column chromatography (30 × 3 cm; dichloromethane) to yield 2,8-bis(6-formylpyren-2-yl)-2,8-dimethylnonane (**13**) as a bright yellow solid (0.488 g, 84%):  $R_f = 0.26$  (dichloromethane); m.p. 165–168 °C (dichloromethane);  $^1\text{H NMR}$  (500 MHz,  $\text{CDCl}_3$ )  $\delta$  10.62 (s, 2H), 9.27 (d,  $J=9.2$  Hz, 2H), 8.16 (d,  $J=7.9$  Hz, 2H), 8.13–8.10 (m, 4H), 8.08 (d,  $J=9.2$  Hz, 2H), 8.01 (d,  $J=8.9$  Hz, 2H), 7.97 (d,  $J=8.9$  Hz, 2H), 7.85 (d,  $J=7.8$  Hz, 2H), 1.77–1.74 (m, 4H), 1.49 (s, 12H), 1.14–1.11 (m, 2H), 0.99–0.97 (m, 4H);  $^{13}\text{C NMR}$  (125.77 MHz,  $\text{CDCl}_3$ )  $\delta$  193.34, 148.82, 135.77, 132.28, 131.49, 131.45, 131.30, 131.19, 131.11, 130.66, 127.60, 127.32, 125.29, 124.85, 124.62, 123.14, 122.62, 45.41, 38.72, 30.37, 29.80, 25.10; LCMS (APCI-positive)  $m/z$  (rel. int.) 615 (11), 614 (49), 613 ( $[\text{M}+\text{H}]^+$ , 100); HRMS (EI) calculated for  $\text{C}_{45}\text{H}_{40}\text{O}_2$  ( $[\text{M}]^+$ ) 612.3028, found 612.3020.

### **2,10-Bis(6-formylpyren-2-yl)-2,10-dimethylundecane (15)**

Titanium(IV) chloride (0.67 g, 3.5 mmol) was added to a stirred 0 °C solution of 2,10-bis(2-pyrenyl)-2,10-dimethylundecane (**12**) (0.82 g, 1.4 mmol) and dichloromethyl methyl ether (0.40 g, 3.5 mmol) in dichloromethane (30 mL). The cooling bath was removed and the resulting mixture was stirred at room temperature for 2 h. The reaction mixture was poured into ice water (100 mL) and the layers were separated. The aqueous layer was extracted with dichloromethane (2 × 30 mL) and the combined organic

extracts were washed with washed with a saturated solution of sodium bicarbonate (40 mL), washed with brine (40 mL), dried over MgSO<sub>4</sub>, filtered and concentrated under reduced pressure. The solid brown residue was subjected to column chromatography (20 × 3.5 cm; dichloromethane) to yield 2,10-bis(6-formylpyren-2-yl)-2,10-dimethylundecane (**15**) as a light brown oil (0.77 g, 88%): *R<sub>f</sub>* = 0.26 (dichloromethane); <sup>1</sup>H NMR (500 MHz, CDCl<sub>3</sub>) δ 10.73 (s, 2H), 9.32 (d, *J*=9.2 Hz, 2H), 8.38 (d, *J*=7.9 Hz, 2H), 8.22 (d, *J*=9.2 Hz, 2H), 8.20–8.14 (m, 6H) 8.10 (d, *J*=8.9 Hz, 2H), 8.00 (d, *J*=8.9 Hz, 2H), 1.75–1.72 (m, 4H), 1.49 (s, 12H), 1.08–1.04 (m, 6H) 0.98–0.93 (m, 4H); <sup>13</sup>C NMR (125.77 MHz, CDCl<sub>3</sub>) δ 193.52, 148.94, 135.75, 132.22, 131.54, 131.51, 131.33, 131.25, 131.15, 130.63, 127.67, 127.36, 125.33, 124.96, 124.70, 123.26, 122.63, 45.36, 38.69, 30.41, 29.84, 29.61 25.12; LCMS (APCI-positive) *m/z* (rel. int.) 643 (14), 642 (54), 641 ([M+H]<sup>+</sup>, 100), 613 (16); HRMS (EI) calculated for C<sub>47</sub>H<sub>44</sub>O<sub>2</sub> ([M]<sup>+</sup>) 640.3341, found 640.3335.

### 2,8-Bis(6-(bromomethyl)pyren-2-yl)-2,8-dimethylnonane (**16**)

Sodium borohydride (0.082 g, 2.2 mmol) was added to a stirred 0 °C solution of 2,8-bis(6-formylpyren-2-yl)-2,8-dimethylnonane (**13**) (0.385 g, 0.627 mmol) in THF (20 mL). The resulting slurry was allowed to slowly warm to room temperature over a 16 h period. THF was evaporated under reduced pressure and the solid residue was taken up into dichloromethane (30 mL). This solution was cooled to 0 °C and an aqueous 1 M HCl solution was added until the solution was at acidic pH. The layers were separated and the aqueous layer was extracted with dichloromethane (2 × 20 mL). The combined organic extracts were washed with a saturated solution of sodium bicarbonate (30 mL), washed with brine (30 mL), dried over MgSO<sub>4</sub>, filtered and concentrated under reduced pressure to yield 2,8-bis(6-(hydroxymethyl)pyren-2-yl)-2,8-dimethylnonane as a light yellow oil (0.359 g, 93%). Purification of this compound was not necessary and the crude material was used in subsequent experiments: *R<sub>f</sub>* = 0.18 (1:9 EtOAc/dichloromethane); <sup>1</sup>H NMR (500 MHz, CDCl<sub>3</sub>) δ 8.23 (d, *J*=9.2 Hz, 2H), 8.07 (s, 4H), 8.04 (d, *J*=7.7 Hz, 2H), 8.00 (d, *J*=9.2 Hz, 2H) 7.97–7.95 (m, 4H), 7.93 (d, *J*=7.7 Hz, 2H) 5.27 (s, 4H) 1.99 (br s, 2H), 1.76–1.73 (m, 4H), 1.46 (s, 12H), 1.00–0.97 (m, 2H), 0.91–0.87 (m, 4H); <sup>13</sup>C NMR (125.77 MHz, CDCl<sub>3</sub>) δ 148.22, 133.98, 131.50, 131.42, 130.96, 128.99, 128.53, 128.10, 127.56, 126.07, 125.30, 124.87, 123.57, 123.48, 123.35, 123.18, 64.25, 45.44, 38.61, 30.47, 29.51, 25.31; LCMS (APCI-positive) *m/z* (rel. int.) 597 (12), 596 (51), 595 (100, [M–OH]<sup>+</sup>); HRMS (EI) calculated for C<sub>45</sub>H<sub>44</sub>O<sub>2</sub> ([M]<sup>+</sup>) 616.3341, found 616.3334. Phosphorus tribromide (0.090 g, 0.33 mmol) was added to a stirred 0 °C solution of 2,8-bis(6-(hydroxymethyl)pyren-2-yl)-2,8-dimethylnonane (0.273 g, 0.443 mmol) in dichloromethane (15 mL). After 4 h, water (15 mL) was added. The layers were separated and the

aqueous layer was extracted with dichloromethane (2 × 20 mL). The combined organic extracts were washed with brine (30 mL), dried over MgSO<sub>4</sub>, filtered and concentrated under reduced pressure to yield 2,8-bis(6-(bromomethyl)pyren-2-yl)-2,8-dimethylnonane (**16**) as a light yellow solid (0.292 g, 89%). Purification of **16** was not necessary and the crude material was used in subsequent experiments: *R<sub>f</sub>* = 0.24 (15% dichloromethane/hexanes); m.p. 103–106 °C (dichloromethane); <sup>1</sup>H NMR (500 MHz, CDCl<sub>3</sub>) δ 8.34 (d, *J*=9.9 Hz, 2H), 8.16–8.11 (m, 6H), 8.03 (d, *J*=7.8 Hz, 2H), 8.00–7.94 (m, 6H), 5.26 (s, 4H), 1.78–1.74 (m, 4H), 1.49 (s, 12H), 1.12–1.08 (m, 2H), 1.00–0.96 (m, 4H); <sup>13</sup>C NMR (125.77 MHz, CDCl<sub>3</sub>) δ 148.55, 133.22, 131.40, 130.96, 130.77, 129.32, 128.88, 128.69, 127.76, 127.52, 125.49, 125.03, 123.91, 123.88, 123.24, 123.07, 45.45, 38.63, 32.73, 30.46, 29.87, 25.15; LCMS (APCI-positive) *m/z* (rel. int.) 667 (12), 666 (53), 665 (98, [M(<sup>81</sup>Br)–Br]<sup>+</sup>), 664 (52), 663 (100, [M(<sup>79</sup>Br)–Br]<sup>+</sup>); No HRMS data could be obtained for this compound.

### 2,9-Bis(6-(bromomethyl)pyren-2-yl)-2,9-dimethyldecane (**17**)

Sodium borohydride (0.356 g, 9.57 mmol) was added to a stirred 0 °C solution of 2,9-bis(6-formylpyren-2-yl)-2,9-dimethyldecane (**14**) (1.50 g, 2.39 mmol) in THF (30 mL). The resulting slurry was allowed to slowly warm to room temperature over a 12 h period. The solvent was evaporated under reduced pressure and the solid residue was taken up in dichloromethane (30 mL). This solution was cooled to 0 °C and an aqueous 1 M HCl solution was added until the solution was at acidic pH. The layers were separated and the aqueous layer was extracted with dichloromethane (2 × 30 mL). The combined organic extracts were washed with a saturated solution of sodium bicarbonate (50 mL), washed with brine (50 mL), dried over MgSO<sub>4</sub>, filtered and concentrated under reduced pressure to yield 2,9-bis(6-(hydroxymethyl)pyren-2-yl)-2,9-dimethyldecane as a clear straw-colored oil (1.43 g, 95%). This compound was used in further experiments without purification: *R<sub>f</sub>* = 0.35 (1:9 EtOAc/dichloromethane); <sup>1</sup>H NMR (500 MHz, CDCl<sub>3</sub>) δ 8.23 (d, *J*=9.2 Hz, 2H), 8.07 (s, 4H), 8.05 (d, *J*=7.7 Hz, 2H), 8.00 (d, *J*=9.2 Hz, 2H), 7.96–7.94 (m, 4H), 7.93 (d, *J*=7.7 Hz, 2H), 5.27 (s, 4H), 1.99 (br s, 2H), 1.76–1.73 (m, 4H), 1.46 (s, 12H), 1.08–1.05 (m, 4H), 0.98–0.94 (m, 4H); <sup>13</sup>C NMR (125.77 MHz, CDCl<sub>3</sub>) δ 148.22, 133.98, 131.50, 131.42, 130.96, 128.99, 128.53, 128.10, 127.56, 126.07, 125.30, 124.87, 123.57, 123.48, 123.35, 123.18, 64.25, 45.44, 38.61, 30.47, 29.51, 25.31; LCMS (APCI-positive) *m/z* (rel. int.) 615 (15), 614 (50), 613 (100, [M–OH]<sup>+</sup>); HRMS (EI) calculated for C<sub>46</sub>H<sub>46</sub>O<sub>2</sub> ([M]<sup>+</sup>) 630.3498, found 630.3496. Phosphorus tribromide (0.398 g, 1.48 mmol) was added to a stirred solution of 2,9-bis(6-(hydroxymethyl)pyren-2-yl)-2,9-dimethyldecane (1.24 g, 1.97 mmol) in dichloromethane (25 mL) at 0 °C. The resulting mixture was allowed to warm to room temperature and stirred for 1 h. Water (25 mL)



was added and the layers were separated. The aqueous layer was extracted with dichloromethane (2 × 30 mL). The combined organic extracts were washed with brine (50 mL), dried over MgSO<sub>4</sub>, filtered and concentrated under reduced pressure to yield 2,9-bis(6-(bromomethyl)pyren-2-yl)-2,9-dimethyldecane (**17**) as a light yellow solid (1.38 g, 92%). This material was used in further experiments without purification: *R<sub>f</sub>* = 0.22 (15% dichloromethane/hexanes); m.p. 193–194 °C (CHCl<sub>3</sub>); <sup>1</sup>H NMR (500 MHz, CDCl<sub>3</sub>) δ 8.29 (d, *J*=9.2 Hz, 2H), 8.14–8.12 (m, 6H), 8.03 (d, *J*=7.8 Hz, 2H), 7.99 (d, *J*=8.9 Hz, 2H) 7.94 (d, *J*=8.9 Hz, 2H), 7.92 (d, *J*=7.8 Hz, 2H), 5.21 (s, 4H), 1.75–1.73 (m, 4H), 1.46 (s, 12H), 1.10–1.08 (m, 4H), 0.99–0.94 (m, 4H); <sup>13</sup>C NMR (125.77 MHz, CDCl<sub>3</sub>) δ 148.55, 133.21, 131.41, 130.97, 130.76, 129.31, 128.88, 128.69, 127.76, 127.52, 125.47, 125.03, 123.91, 123.88, 123.24, 123.07, 45.45, 38.64, 32.74, 30.49, 29.88, 25.17; LCMS (APCI-positive) *m/z* (rel. int.) 679 (12), 678 (41), 677 (100, [M(<sup>81</sup>Br)–Br]<sup>+</sup>), 676 (42), 675 (92, [M(<sup>79</sup>Br)–Br]<sup>+</sup>); HRMS (EI) calculated for C<sub>46</sub>H<sub>44</sub>Br<sub>2</sub> ([M]<sup>+</sup>) 754.1810, found 754.1804.

### **2,10-Bis(6-(bromomethyl)pyren-2-yl)-2,10-dimethylundecane (18)**

Sodium borohydride (0.124 g, 3.28 mmol) was added to a stirred 0 °C solution of 2,10-bis(6-formylpyren-2-yl)-2,10-dimethylundecane (**15**) (0.610 g, 0.952 mmol) in THF (30 mL). The resulting slurry was allowed to slowly warm to room temperature over a 12 h period. THF was evaporated under reduced pressure and the solid residue was taken up into dichloromethane (30 mL). This solution was cooled to 0 °C and an aqueous 1 M HCl solution was added until the solution was at acidic pH. The layers were separated and the aqueous layer extracted with dichloromethane (2 × 30 mL). The combined organic extracts were washed with a saturated solution of sodium bicarbonate (30 mL), washed with brine (30 mL), dried over MgSO<sub>4</sub>, filtered and concentrated under reduced pressure to yield 2,10-bis(6-(hydroxymethyl)pyren-2-yl)-2,10-dimethylundecane as a clear straw-colored oil (0.581 g, 94%). Purification of this compound was not necessary and the crude material was used in subsequent experiments: *R<sub>f</sub>* = 0.13 (1:9 EtOAc/dichloromethane); <sup>1</sup>H NMR (500 MHz, CDCl<sub>3</sub>) δ 8.32 (d, *J*=9.2 Hz, 2H), 8.21–8.17 (m, 6H), 8.08 (d, *J*=7.8 Hz, 2H), 8.04 (d, *J*=8.9 Hz, 2H) 8.01–7.98 (m, 4H), 5.24 (s, 4H) 1.93 (br s, 2H), 1.79–1.75 (m, 4H), 1.52 (s, 12H), 1.13–1.07 (m, 6H), 1.02–0.97 (m, 4H); <sup>13</sup>C NMR (125.77 MHz, CDCl<sub>3</sub>) δ 148.06, 133.77, 131.31, 131.22, 130.75, 128.80, 128.34, 127.91, 127.35, 125.87, 125.10, 124.67, 123.39, 123.28, 123.15, 122.98, 64.05, 45.26, 38.61, 30.35, 29.68, 29.42, 25.41; LCMS (APCI-positive) *m/z* (rel. int.) 629 (12), 628 (51), 627 (100, [M–OH]<sup>+</sup>); HRMS (EI) calculated for C<sub>47</sub>H<sub>48</sub>O<sub>2</sub> ([M]<sup>+</sup>) 644.3654, found 644.3643. Phosphorus tribromide (0.160 g, 0.591 mmol) was added to a stirred 0 °C solution of 2,10-bis(6-(hydroxymethyl)pyren-2-yl)-2,10-dimethylundecane (0.510 g, 0.791



mmol) in dichloromethane (20 mL). The reaction was allowed to warm to room temperature and after 1 h, water (20 mL) was added. The layers were separated and the aqueous layer was extracted with dichloromethane (2 × 30 mL). The combined organic extracts were washed with water (50 mL), washed with brine (50 mL), dried over MgSO<sub>4</sub>, filtered and concentrated under reduced pressure to yield 2,10-bis(6-(bromomethyl)pyren-2-yl)-2,10-dimethylundecane (**18**) as a light yellow solid (0.542 g, 89%). Purification of **18** was not necessary and the crude material was used in subsequent experiments:  $R_f$  = 0.22 (15% dichloromethane/hexanes); m.p. 182–183 °C (dichloromethane); <sup>1</sup>H NMR (500 MHz, CDCl<sub>3</sub>) δ 8.36 (d,  $J$ =9.3 Hz, 2H), 8.22–8.16 (m, 6H), 8.10–8.04 (m, 4H), 8.02–7.98 (m, 4H), 5.31 (s, 4H), 1.77–1.74 (m, 4H), 1.51 (s, 12H), 1.14–1.11 (m, 6H), 1.03–0.99 (m, 4H); <sup>13</sup>C NMR (125.77 MHz, CDCl<sub>3</sub>) δ 148.37, 132.00, 131.19, 130.75, 130.54, 129.79, 128.67, 128.48, 127.53, 127.30, 125.26, 124.80, 123.70, 123.67, 123.02, 122.84, 45.91, 38.88, 32.45, 30.40, 29.88, 25.01 (only 22 of 23 signals observed); LCMS (APCI-positive)  $m/z$  (rel. int.) 693 (12), 692 (44), 691 (100, [M(<sup>81</sup>Br)–Br]<sup>+</sup>), 690 (46), 689 (92, [M(<sup>79</sup>Br)–Br]<sup>+</sup>); HRMS (EI) calculated for C<sub>47</sub>H<sub>46</sub>Br<sub>2</sub> ([M]<sup>+</sup>) 768.1966, found 768.1961.

### 1,1,7,7-Tetramethyl[7.2](7,1)pyrenophane (**19**)

A solution of *n*-butyllithium (0.50 M, 0.31 mL, 0.16 mmol) in hexanes was added to a stirred –15 °C solution of 2,8-bis(6-(bromomethyl)pyren-2-yl)-2,8-dimethylnonane (**16**) (0.179 g, 0.241 mmol) in THF (20 mL). After 10 min, water (20 mL) was added to the reaction mixture. THF was evaporated under reduced pressure and the resulting aqueous solution was extracted with dichloromethane (3 × 30 mL). The combined organic extracts were washed with a saturated solution of sodium bicarbonate (30 mL), washed with brine (30 mL), dried over MgSO<sub>4</sub>, filtered and concentrated under reduced pressure. The residue was preadsorbed on silica gel and purified by column chromatography (30 × 2 cm; 15% dichloromethane/hexanes) to yield 1,1,7,7-tetramethyl[7.2](7,1)pyrenophane (**19**) as a clear, colorless oil (0.080 g, 57%):  $R_f$  = 0.38 (15% dichloromethane/hexanes); <sup>1</sup>H NMR (500 MHz, CDCl<sub>3</sub>) δ 8.31–8.26 (m, 2H), 8.16–8.03 (m, 6H), 8.00–7.95 (m, 2H), 7.90–7.88 (m, 2H), 7.34 (s, 2H) 6.59–6.48 (m, 2H), 3.88 (s, 4H) 1.60–1.28 (m, 16H), 1.05–1.00 (m, 2H), 0.65–0.55 (m, 2H), 0.39–0.28 (m, 2H); <sup>13</sup>C NMR (125.77 MHz, CDCl<sub>3</sub>) δ 146.13, 130.93, 130.06, 130.00, 129.83, 127.67, 127.13, 127.09, 125.27, 125.10, 124.70, 123.02, 122.52, 122.28, 122.21, 46.01, 38.38, 36.82, 30.39, 29.51 25.71 (only 21 of 23 signals observed); LCMS (APCI-positive)  $m/z$  (rel. int.) 585 (14), 584 (51), 583 (100, [M+H]<sup>+</sup>); HRMS (EI) calculated for C<sub>45</sub>H<sub>42</sub> ([M]<sup>+</sup>) 582.3287, found 582.3280.

### 1,1,8,8-Tetramethyl[8.2](7,1)pyrenophane (20)

A solution of *n*-butyllithium (1.0 M, 0.40 mL, 0.40 mmol) in hexanes was added to a stirred  $-15\text{ }^{\circ}\text{C}$  solution of 2,9-bis(6-(bromomethyl)pyren-2-yl)-2,9-dimethyldecane (**17**) (0.401 g, 0.529 mmol) in THF (45 mL). After 10 min, water (15 mL) was added to the reaction mixture. THF was evaporated under reduced pressure and the resulting aqueous solution was extracted with dichloromethane ( $3 \times 30$  mL). The combined organic extracts were washed with an aqueous 1 M HCl solution (30 mL), washed with a saturated solution of sodium bicarbonate (30 mL), washed with brine (30 mL), dried over  $\text{MgSO}_4$ , filtered and concentrated under reduced pressure. The resulting residue was preadsorbed on silica gel and purified by column chromatography ( $25 \times 3$  cm; 15% dichloromethane/hexanes) to yield 1,1,8,8-tetramethyl[8.2](7,1)pyrenophane (**20**) as a clear, colorless oil (0.186 g, 59%):  $R_f = 0.32$  (15% dichloromethane/hexanes);  $^1\text{H NMR}$  (500 MHz,  $\text{CDCl}_3$ )  $\delta$  8.22 (br d, 2H), 8.15 (br d, 2H), 8.02 (d,  $J=9.4$  Hz, 2H), 7.89–7.84 (m, 4H), 7.35 (s, 2H) 6.68–6.50 (m, 4H), 3.89 (s, 4H) 1.66–1.58 (m, 4H), 1.43–1.28 (m, 12H), 1.12–1.06 (m, 4H), 0.57–0.43 (m, 2H), 0.30–0.18 (m, 2H);  $^{13}\text{C NMR}$  (125.77 MHz,  $\text{CDCl}_3$ )  $\delta$  146.10, 131.05, 129.98, 129.91, 129.80, 127.62, 127.16, 127.00, 125.54, 125.04, 125.02, 124.67, 122.85, 122.53, 122.36, 122.05, 46.44, 38.11, 36.47, 31.45, 30.48, 24.22; LCMS (APCI-positive)  $m/z$  (rel. int.) 599 (12), 598 (53), 597 (100  $[\text{M}+\text{H}]^+$ ); HRMS (EI) calculated for  $\text{C}_{46}\text{H}_{44}$  ( $[\text{M}]^+$ ) 596.3443, found 596.3436.

### 1,1,9,9-Tetramethyl[9.2](7,1)pyrenophane (21)

A solution of *n*-butyllithium (0.50 M, 0.61 mL, 0.31 mmol) in hexanes was added to a stirred  $-15\text{ }^{\circ}\text{C}$  solution of 2,10-bis(6-(bromomethyl)pyren-2-yl)-2,10-dimethylundecane (**18**) (0.420 g, 0.548 mmol) in THF (30 mL). After 10 min, water (25 mL) was added to the reaction mixture. THF was evaporated under reduced pressure and the resulting aqueous solution was extracted with dichloromethane ( $3 \times 25$  mL). The combined organic extracts were washed with an aqueous solution of 1 M HCl (30 mL), washed with a saturated solution of sodium bicarbonate (30 mL), washed with brine (30 mL), dried over  $\text{MgSO}_4$ , filtered and concentrated under reduced pressure. The resulting residue was preadsorbed on silica gel and purified by column chromatography ( $25 \times 2.5$  cm; 15% dichloromethane/hexanes) to yield 1,1,9,9-tetramethyl[9.2](7,1)pyrenophane (**21**) as a clear, colorless oil (0.177 g, 53%):  $R_f = 0.31$  (15% dichloromethane/hexanes);  $^1\text{H NMR}$  (500 MHz,  $\text{CDCl}_3$ )  $\delta$  8.14 (d,  $J=9.0$  Hz, 2H), 8.08 (d,  $J=9.1$  Hz, 2H), 8.00 (d,  $J=9.2$  Hz, 2H), 7.97–7.92 (m, 4H), 7.69 (br s, 2H), 7.24 (br d, 2H) 7.12 (d,  $J=9.0$  Hz, 2H), 4.02 (s, 4H) 1.71–1.67 (m, 4H), 1.50 (s, 12H), 1.01–0.96 (m, 6H), 0.78–0.73 (m, 4H);  $^{13}\text{C NMR}$  (125.77 MHz,  $\text{CDCl}_3$ ) 146.62, 136.18, 130.95, 130.34, 129.67, 129.62, 127.73, 127.26, 126.89, 126.34, 124.81, 124.78,

123.24, 122.91, 122.53, 122.43, 45.58, 38.31, 35.65, 30.64, 29.67, 29.35, 25.05; LCMS (APCI-positive)  $m/z$  (rel. int.) 613 (13), 612 (54), 611 ( $[M+H]^+$  100), 598 (11), 597 (22); HRMS (EI) calculated for  $C_{47}H_{46}$  ( $[M]^+$ ) 610.3600, found 610.3600.

### 12,22-Diformyl-1,1,7,7-tetramethyl[7.2](7,1)pyrenophane (22)

A solution of titanium(IV) chloride (1.0 M, 0.28 mL, 0.28 mmol) in dichloromethane was added to a stirred 0 °C solution of 1,1,7,7-tetramethyl[7.2](7,1)pyrenophane (**19**) (0.064 g, 0.11 mmol) and dichloromethyl methyl ether (0.032 g, 0.28 mmol) in dichloromethane (12 mL). The cooling bath was removed and after 2 h the reaction was poured into ice water (30 mL). The layers were separated and the aqueous layer was extracted with dichloromethane (2 × 10 mL). The combined organic extracts were washed with brine (20 mL), dried over  $MgSO_4$ , filtered and concentrated under reduced pressure. The solid brown residue was subjected to column chromatography (25 × 2 cm; dichloromethane) to yield 12,22-diformyl-1,1,7,7-tetramethyl[7.2](7,1)pyrenophane (**22**) as a bright yellow solid (0.052 g, 74%):  $R_f$  = 0.42 (dichloromethane); m.p. 292 °C (dec.) (dichloromethane);  $^1H$  NMR (500 MHz,  $CDCl_3$ )  $\delta$  10.93 (s, 2H), 9.35 (d,  $J=9.2$  Hz, 2H), 8.53 (s, 2H), 8.15 (d,  $J=9.2$  Hz, 2H), 7.96 (s, 2H) 7.37 (s, 2H), 6.60 (br s, 2H), 6.47 (br s, 2H), 3.92 (br s, 4H), 1.42–1.40 (m, 12H), 1.29–1.21 (m, 4H), 0.82–0.77 (m, 2H), 0.55–0.48 (m, 2H), 0.28–0.19 (m, 2H);  $^{13}C$  NMR (125.77 MHz,  $CDCl_3$ )  $\delta$  193.27, 147.20, 135.99, 134.82, 134.43, 132.74, 130.59, 130.08, 129.85, 129.64, 128.75, 127.44, 124.72, 124.42, 124.37, 122.46, 122.33, 121.80, 45.57, 38.46, 38.30, 30.18, 25.59; LCMS (APCI-positive)  $m/z$  (rel. int.) 641 (10), 640 (49), 639 (100,  $[M+H]^+$ ); HRMS (EI) calculated for  $C_{47}H_{42}O_2$  ( $[M]^+$ ) 638.3185, found 638.3181.

### 13,23-Diformyl-1,1,8,8-tetramethyl[8.2](7,1)pyrenophane (23)

A solution of titanium(IV) chloride (1.0 M, 0.50 mL, 0.50 mmol) in dichloromethane was added to a stirred 0 °C solution of 1,1,8,8-tetramethyl[8.2](7,1)pyrenophane (**20**) (0.120 g, 0.201 mmol) and dichloromethyl methyl ether (0.058 g, 0.50 mmol) in dichloromethane (10 mL). The cooling bath was removed and after 3 h the reaction was poured into ice water (50 mL). The layers were separated and the aqueous layer was extracted with dichloromethane (2 × 15 mL). The combined organic extracts were washed with a saturated solution of sodium bicarbonate (20 mL), washed with brine (20 mL), dried over  $MgSO_4$ , filtered and concentrated under reduced pressure. The solid brown residue was subjected to column chromatography (30 × 2.5 cm; dichloromethane) to yield 13,23-diformyl-1,1,8,8-tetramethyl[8.2](7,1)pyrenophane (**23**) as a bright yellow solid (0.102 g, 77%):  $R_f$  = 0.28

(dichloromethane); m.p. 296–297 °C (dichloromethane);  $^1\text{H}$  NMR (500 MHz,  $\text{CDCl}_3$ ,  $T = -25$  °C)  $\delta$  10.95 (s, 2H), 9.36 (d,  $J=9.2$  Hz, 2H), 8.62 (s, 2H), 8.16 (d,  $J=9.2$  Hz, 2H), 8.00 (s, 2H) 7.44 (s, 2H), 6.78 (d,  $J=9.1$  Hz, 2H), 6.59 (d,  $J=9.1$  Hz, 2H), 3.95 (s, 4H), 1.77 (s, 2H), 1.70–1.65 (m, 2H), 1.49–1.45 (m, 2H), 1.37 (s, 6H), 1.31 (s, 6H) 1.01–0.96 (m, 2H) 0.58–0.51 (m, 2H) 0.15–0.10 (m, 2H);  $^{13}\text{C}$  NMR (125.77 MHz,  $\text{CDCl}_3$ ,  $T = -25$  °C)  $\delta$  193.60, 147.41, 135.98, 134.70, 132.87, 130.74, 130.46, 130.18, 129.70, 129.26, 127.59, 124.86, 124.70, 124.42, 122.48, 122.38, 121.98, 46.09, 38.40, 36.43, 32.16, 30.13, 28.09, 24.02; LCMS (APCI-positive)  $m/z$  (rel. int.) 655 (12), 654 (53), 653 ( $[\text{M}+\text{H}]^+$ , 100); HRMS (EI) calculated for  $\text{C}_{48}\text{H}_{44}\text{O}_2$  ( $[\text{M}]^+$ ) 652.3341, found 652.3328.

#### **14,24-Diformyl-1,1,9,9-tetramethyl[9.2](7,1)pyrenophane (24)**

A solution of titanium(IV) chloride (1.0 M, 0.35 mL, 0.35 mmol) in dichloromethane was added to a stirred 0 °C solution of 1,1,9,9-tetramethyl[9.2](1,7)pyrenophane (**21**) (0.085 g, 0.14 mmol) and dichloromethyl methyl ether (0.040 g, 0.35 mmol) in dichloromethane (15 mL). The cooling bath was removed and after 2 h the reaction was poured into ice water (50 mL). The layers were separated and the aqueous layer was extracted with dichloromethane (2 × 30 mL). The combined organic extracts were washed with a saturated solution of sodium bicarbonate (30 mL), washed with brine (30 mL), dried over  $\text{MgSO}_4$ , filtered and concentrated under reduced pressure. The yellow residue was subjected to column chromatography (25 × 2.5 cm; dichloromethane) to yield 14,24-diformyl-1,1,9,9-tetramethyl[9.2](7,1)pyrenophane (**24**) as a bright yellow oil (0.075 g, 81%):  $R_f = 0.24$  (dichloromethane);  $^1\text{H}$  NMR (500 MHz,  $\text{CDCl}_3$ )  $\delta$  10.83 (s, 2H), 9.24 (d,  $J=9.2$  Hz, 2H), 8.43 (s, 2H), 8.11 (d,  $J=9.2$  Hz, 2H), 8.00 (s, 2H) 7.69 (s, 2H), 7.14 (br s, 4H), 3.99 (s, 4H), 1.58–1.55 (m, 4H), 1.40 (s, 12H), 0.87–0.84 (m, 6H), 0.66–0.63 (m, 4H);  $^{13}\text{C}$  NMR (125.77 MHz,  $\text{CDCl}_3$ )  $\delta$  193.16, 147.69, 135.33, 134.16, 132.76, 130.42, 130.24, 129.95, 129.79, 129.72, 127.17, 124.84, 124.73, 124.51, 122.61, 122.45, 122.20, 45.43, 38.38, 35.29, 29.91, 29.83, 29.57, 24.90; LCMS (APCI-positive)  $m/z$  (rel. int.) 669 (14), 668 (55), 667 ( $[\text{M}+\text{H}]^+$ , 100); HRMS (EI) calculated for  $\text{C}_{49}\text{H}_{46}\text{O}_2$  ( $[\text{M}]^+$ ) 666.3498, found 666.3494.

#### **1,1,7,7-Tetramethyl[7.2.2](7,1,3)pyrenophane-18-monoene (25)**

Titanium(IV) chloride (0.174 g, 0.917 mmol) was added to a 0 °C slurry of zinc dust (0.120 g, 1.83 mmol) and THF (10 mL). After the addition was complete, the reaction was heated to reflux for 1 h, at which point a dark black color persisted, indicative of the low-valent titanium species. Pyridine (0.1 mL) was added to the mixture and stirring at reflux was continued for 10 min. A solution of 12,22-diformyl-1,1,7,7-tetramethyl[7.2](7,1)pyrenophane (**22**) (0.076 g, 0.12 mmol) in THF (10 mL) was then added.

The resulting mixture was heated at 70 °C for 4 h, after which it was poured, without significant cooling, into chloroform (20 mL). The resulting solution was concentrated under reduced pressure and adsorbed on silica gel in preparation for column chromatography. Aqueous work-up for this reaction is not recommended as layer separation can be quite difficult and the yields are lower. The preadsorbed sample was subjected to column chromatography (25 × 2.5 cm; 15% dichloromethane/hexanes) to yield 1,1,7,7-tetramethyl[7.2.2](7,1,3)pyrenophane-18-monoene (**25**) (0.026 g, 36%):  $R_f$  = 0.60 (1:9 EtOAc/hexanes); mp >300 °C (dec.) (CHCl<sub>3</sub>); <sup>1</sup>H NMR (500 MHz, CDCl<sub>3</sub>) δ 8.08 (s, 2H), 7.80 (d,  $J$ =9.2 Hz, 2H), 7.63 (d,  $J$ =9.0 Hz, 2H), 7.62 (s, 2H), 7.53 (br s, 2H), 7.52 (br s, 2H), 7.48 (d,  $J$ =9.2 Hz, 2H), 7.42 (d,  $J$ =9.0 Hz, 2H) 4.29–4.25 (m, 2H), 3.74–3.70 (m, 2H) 1.42–1.37 (m, 4H) 1.34 (s, 6H), 1.33 (s, 6H) 0.76–0.70 (m, 2H), 0.28–0.24 (m, 4H); <sup>13</sup>C NMR (125.77 MHz, CDCl<sub>3</sub>) δ 145.64, 137.69, 136.14, 130.14, 130.04, 130.01, 128.28, 128.04, 126.29, 125.76, 123.99, 123.64, 122.42, 122.27, 122.21, 122.02, 46.13, 38.45, 31.02, 30.47, 28.77, 28.69, 26.54 (only 23 of 24 signals observed); LCMS (APCI-positive)  $m/z$  (rel. int.) 609 (16), 608 (56), 607 ([M+H]<sup>+</sup>, 100); HRMS (EI) calculated for C<sub>47</sub>H<sub>42</sub> ([M]<sup>+</sup>) 606.3287, found 606.3277.

#### **1,1,8,8-Tetramethyl[8.2.2](7,1,3)pyrenophane-19-monoene (26)**

Titanium(IV) chloride (0.047 g, 0.25 mmol) was added to a 0 °C slurry of zinc dust (0.032 g, 0.50 mmol) and THF (5 mL). After the addition was complete, the reaction was heated to reflux for 1 h, at which point a dark black color persisted, indicative of the low-valent titanium species. Pyridine (0.05 mL) was added to the mixture and stirring at reflux was continued for 10 min. A solution of 13,23-diformyl-1,1,8,8-tetramethyl[8.2](7,1)pyrenophane (**23**) (0.020 g, 0.031 mmol) in THF (5 mL) was then added. The mixture was heated at 70 °C for 4 h, after which it was poured, without significant cooling, into chloroform (15 mL). The resulting solution was concentrated under reduced pressure and adsorbed on silica gel in preparation for column chromatography. Aqueous work-up for this reaction is not recommended as layer separation can be quite difficult and the yields are lower. The preadsorbed sample was subjected to column chromatography (25 × 2 cm; 1:5 dichloromethane/hexanes) to afford 1,1,8,8-tetramethyl[8.2.2](7,1,3)pyrenophane-19-monoene (**26**) as a pale-green oil (0.010 g, 52%):  $R_f$  = 0.61 (1:9 EtOAc/hexanes); <sup>1</sup>H NMR (500 MHz, CDCl<sub>3</sub>) δ 8.10 (s, 2H), 7.82 (d,  $J$ =9.2 Hz, 2H) 7.66–7.64 (m, 4H), 7.56 (d,  $J$ =1.4 Hz, 2H), 7.54 (d,  $J$ =1.4 Hz, 2H), 7.48 (d,  $J$ =9.1 Hz, 2H), 7.44 (d,  $J$ =9.2 Hz, 2H), 4.31–4.26 (m, 2H), 3.76–3.71 (m, 2H), 1.54–1.50 (m, 4H), 1.33 (s, 6H) 1.32 (s, 6H), 1.05–1.02 (m, 4H), 0.34–0.30 (m, 4H); <sup>13</sup>C NMR (125.77 MHz, CDCl<sub>3</sub>) δ 145.37, 138.21, 135.82, 130.01, 128.58, 128.56, 126.12, 125.33, 124.02, 123.99, 123.01, 122.98, 122.96, 122.36, 122.16, 46.72, 38.33, 30.78, 29.65, 24.74;

LCMS (APCI-positive)  $m/z$  (rel. int.) 623 (11), 622 (54), 621 ( $[M+H]^+$ , 100), HRMS (EI) calculated for  $C_{48}H_{44}$  ( $[M]^+$ ) 620.3443, found 620.3438.

### 1,1,9,9-Tetramethyl[9.2.2](7,1,3)pyrenophane-20-monoene (27)

Titanium(IV) chloride (0.103 g, 0.544 mmol) was added to a 0 °C slurry of zinc dust (0.142 g, 1.09 mmol) in THF (15 mL). After the addition was complete, the reaction was heated to reflux for 1 h, at which point a dark black color persisted, indicative of the low-valent titanium species. Pyridine (0.15 mL) was added to the mixture and stirring at reflux was continued for 10 min. A solution of 14,24-diformyl-1,1,9,9-tetramethyl[9.2](7,1)pyrenophane (**24**) (0.069 g, 0.10 mmol) in THF (10 mL) was then added. The mixture was heated at 70 °C for 4 h, after which it was poured, without significant cooling, into chloroform (40 mL). The resulting solution was concentrated under reduced pressure and adsorbed on silica gel in preparation for column chromatography. Aqueous work-up for this reaction is not recommended as layer separation can be quite difficult and the yields are lower. The preadsorbed sample was subjected to column chromatography (30 × 2 cm; 1:5 dichloromethane/hexanes) to give 1,1,9,9-tetramethyl[9.2.2](7,1,3)pyrenophane-20-monoene (**27**) as a light green oil (0.033 g, 51%):  $R_f$  = 0.64 (1:9 EtOAc/hexanes);  $^1H$  NMR (500 MHz,  $CDCl_3$ )  $\delta$  8.12 (s, 2H), 7.84 (d,  $J$ =9.2 Hz, 2H), 7.81 (s, 2H), 7.68 (d,  $J$ =9.0 Hz, 2H), 7.62 (br s, 2H), 7.61 (br s, 2H), 7.55 (d,  $J$ =9.2 Hz, 2H), 7.50 (d,  $J$ =9.0 Hz, 2H), 4.31–4.24 (m, 2H), 3.80–3.73 (m, 2H), 1.53–1.50 (m, 4H) 1.32 (s, 6H), 1.31 (s, 6H), 0.88–0.83 (m, 6H), 0.63–0.58 (m, 4H);  $^{13}C$  NMR (125.77 MHz,  $CDCl_3$ )  $\delta$  146.05, 137.38, 135.73, 130.18, 130.16, 129.38, 129.32, 128.24, 127.81, 126.47, 126.00, 123.74, 123.59, 122.65, 122.30, 122.16, 122.13, 45.92, 38.14, 30.64, 30.15, 29.36, 29.25, 28.67, 24.95; LCMS (APCI-positive)  $m/z$  (rel. int.) 637 (15), 636 (54), 635 ( $[M+H]^+$ , 100); HRMS (EI) calculated for  $C_{49}H_{46}$  ( $[M]^+$ ) 634.3600, found 634.3602.

### 1,1,7,7-Tetramethyl[7](2,11)teropyrenophane (28)

A solution of 1,1,7,7-tetramethyl[7.2.2](7,1,3)pyrenophane-18-monoene (**25**) (65.0 mg, 0.107 mmol) and 2,3-dichloro-5,6-dicyano-1,4-benzoquinone (487 mg, 2.15 mmol), which was added in equal portions over 1 h intervals, in *m*-xylene (5 mL) was heated at 130 °C for 14 h. The hot solvent was evaporated under a stream of nitrogen gas. The residue was taken up into EtOAc and adsorbed on silica gel in preparation for column chromatography. The preadsorbed sample was subjected to column chromatography (39 × 1.5 cm; 5% EtOAc/hexanes) to yield 1,1,7,7-tetramethyl[7](2,11)teropyrenophane (**28**) (22 mg, 36%, (50% borsm)), which exhibits yellow fluorescence at 365 nm, and **25** (20 mg, 31% recovery).  $R_f$  = 0.27 (1:9 EtOAc/hexanes); m.p. >300 °C (dec.);  $^1H$  NMR (500 MHz,  $CDCl_3$ )  $\delta$  8.46 (s,



4H), 8.26 (d,  $J=9.5$  Hz, 4H), 7.62 (d,  $J=9.5$  Hz, 4H) 7.29 (s, 4H), 1.35 (s, 12H), 0.78–0.74 (m, 4H), 0.08–0.01 (m, 2H), –1.12 to –1.18 (m, 4H);  $^{13}\text{C}$  NMR  $\delta$  144.50, 128.75, 127.89, 126.97, 126.03, 125.44, 124.89, 124.18, 123.54, 123.18, 77.65, 47.74, 38.23, 31.18, 28.42, 24.27; LCMS (APCI-positive)  $m/z$  (rel. int.) 605 (14), 604 (43), 603 (82,  $[\text{M}+\text{H}]^+$ ); HRMS (EI) calculated for  $\text{C}_{47}\text{H}_{38}$  ( $[\text{M}]^+$ ) 602.2974, found 602.2974.

### 1,1,8,8-Tetramethyl[8](2,11)teropyrenophane (1)

A solution of 1,1,8,8-tetramethyl[8.2.2](7,1,3)pyrenophane-19-monoene (**26**) (0.022 g, 0.036 mmol) and 2,3-dichloro-5,6-dicyano-1,4-benzoquinone (0.032 g, 0.14 mmol) in *m*-xylene (5 mL) was heated at 145 °C for 48 h. The hot solvent was evaporated under a stream of nitrogen gas. The residue was taken up into dichloromethane and adsorbed on silica gel in preparation for column chromatography. The preadsorbed sample was subjected to column chromatography (30 × 2.0 cm; 5% EtOAc/hexanes) to yield 1,1,8,8-tetramethyl[8](2,11)teropyrenophane (**1**) as an orange solid (0.020 g, 90%), which exhibits yellow fluorescence at 365 nm:  $R_f$  = 0.33 (1:9 EtOAc/hexanes); m.p. >300 °C (dec.) (EtOH);  $^1\text{H}$  NMR (500 MHz,  $\text{CDCl}_3$ )  $\delta$  8.62 (s, 4H), 8.39 (d,  $J=9.5$  Hz, 4H), 7.71 (d,  $J=9.5$  Hz, 4H), 7.42 (s, 4H), 1.32 (s, 12H), 0.74–0.70 (m, 4H), –0.24 to –0.27 (m, 4H), –0.65 to –0.70 (m, 4H);  $^{13}\text{C}$  NMR (125.77 MHz,  $\text{CDCl}_3$ )  $\delta$  145.34, 128.57, 127.75, 127.45, 127.36, 125.92, 125.15, 124.56, 123.68, 123.30, 77.68, 47.77, 38.53, 30.12, 29.78, 27.16, 23.96; LCMS (APCI-positive)  $m/z$  (rel. int.) 619 (13), 618 (52), 617 ( $[\text{M}+\text{H}]^+$ , 100); HRMS (CI) calculated for  $\text{C}_{48}\text{H}_{41}$  ( $[\text{M}+\text{H}]^+$ ) 617.3208, found 617.3211.

### 1,1,9,9-Tetramethyl[9](2,11)teropyrenophane (29)

A solution of 1,1,9,9-tetramethyl[9.2.2](7,1,3)pyrenophane-20-monoene (**27**) (0.025 g, 0.039 mmol) and 2,3-dichloro-5,6-dicyano-1,4-benzoquinone (0.039 g, 0.17 mmol) in *m*-xylene (6 mL) was heated at 145 °C for 36 h. The hot solvent was evaporated under a stream of nitrogen gas. The residue was taken up into dichloromethane and adsorbed on silica gel in preparation for column chromatography. The preadsorbed sample was subjected to column chromatography (30 × 2.0 cm; 5% EtOAc/hexanes) to yield 1,1,9,9-tetramethyl[9](2,11)teropyrenophane (**29**) as an orange solid (0.023 g, 95%), which exhibits yellow fluorescence at 365 nm.  $R_f$  = 0.40 (1:9 EtOAc/hexanes); m.p. >300 °C (dec.) ( $\text{CHCl}_3$ );  $^1\text{H}$  NMR (500 MHz,  $\text{CDCl}_3$ )  $\delta$  8.77 (s, 4H), 8.52 (d,  $J=9.5$  Hz, 4H), 7.80 (d,  $J=9.5$  Hz, 4H) 7.50 (s, 4H), 1.37 (s, 12H), 0.81–0.78 (m, 4H), –0.51 to –0.55 (m, 4H), –0.99 to –1.03 (m, 6H); (APCI-positive)  $m/z$  (rel. int.) 633 (16), 632 (54) 631 ( $[\text{M}+\text{H}]^+$ , 100); HRMS (EI) calculated for  $\text{C}_{49}\text{H}_{42}$  ( $[\text{M}]^+$ ) 630.3287, found 630.3282.



## $^1\text{H}$ and $^{13}\text{C}$ NMR Spectra

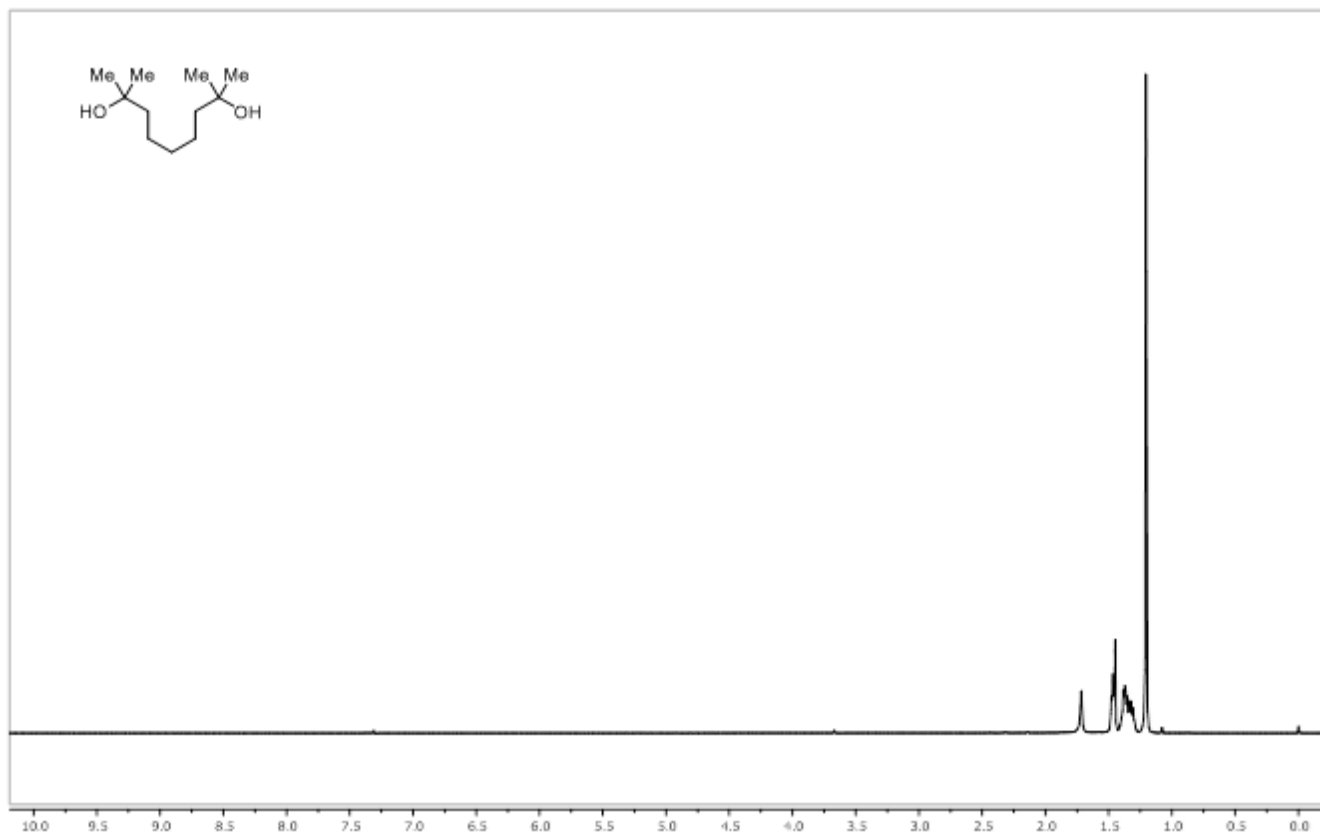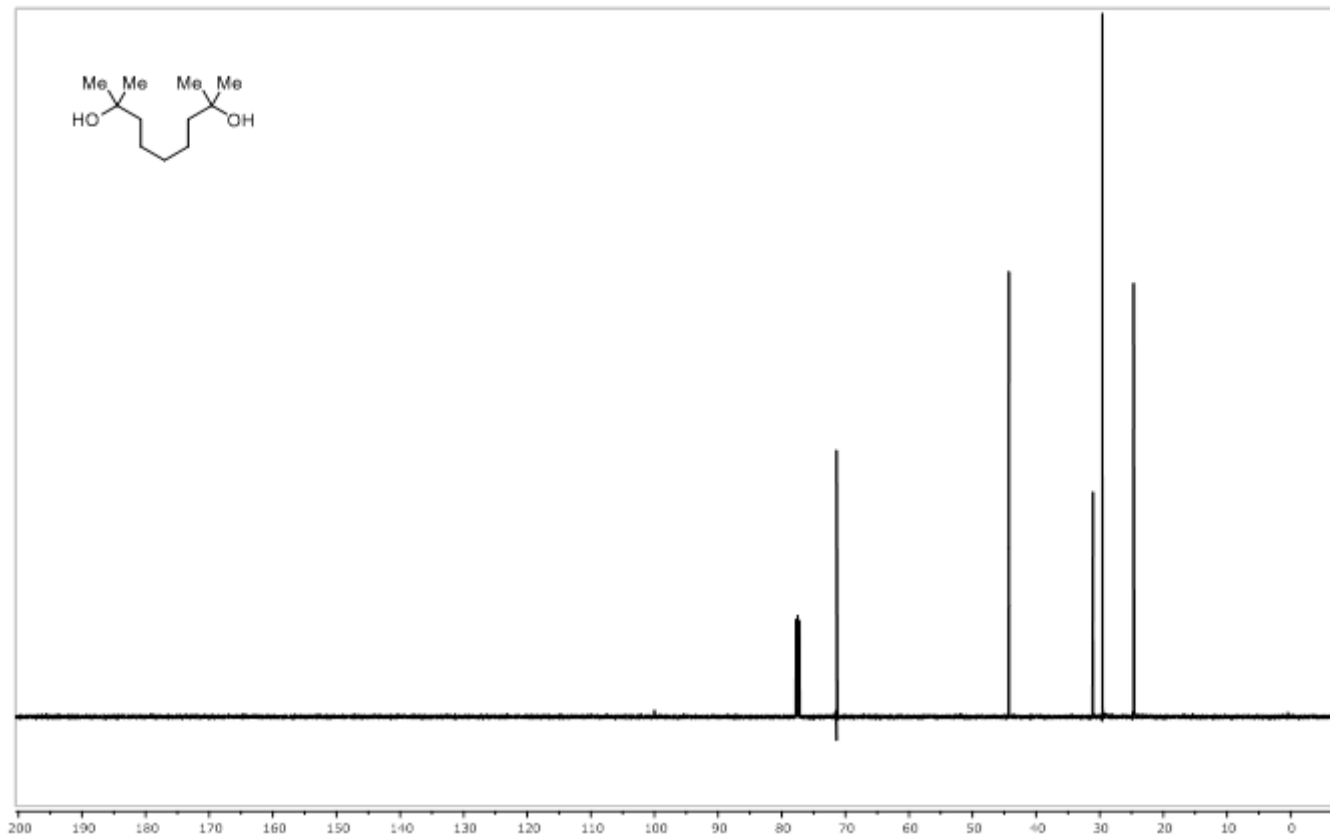

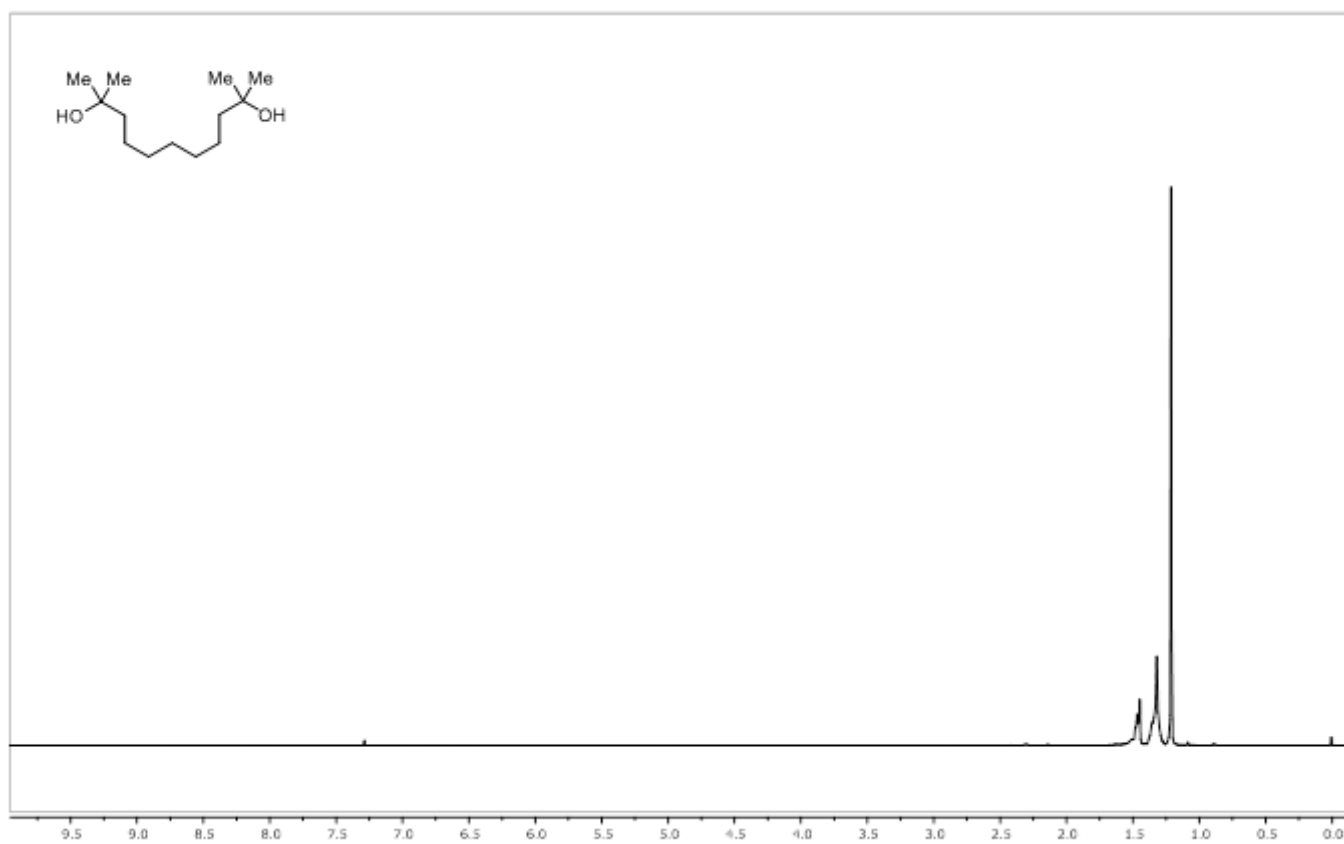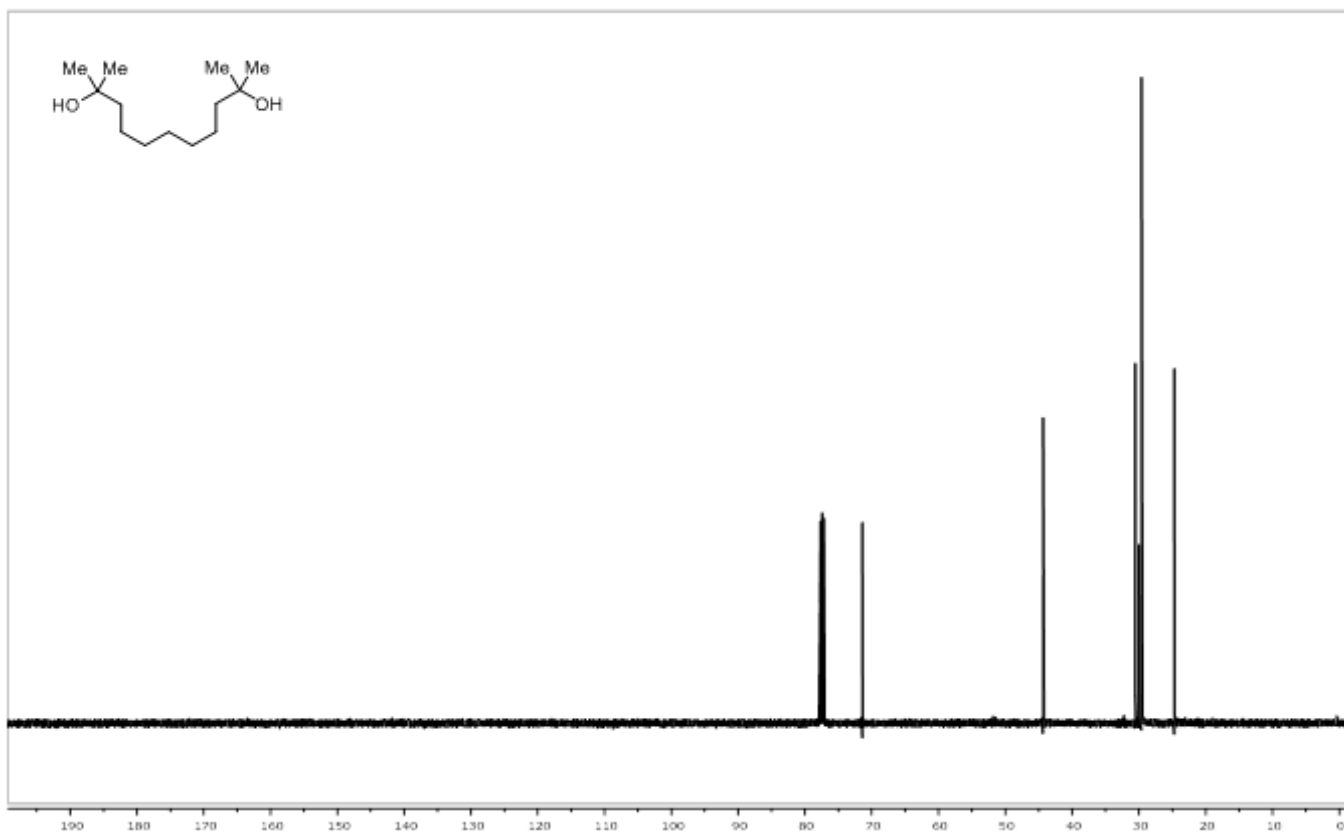

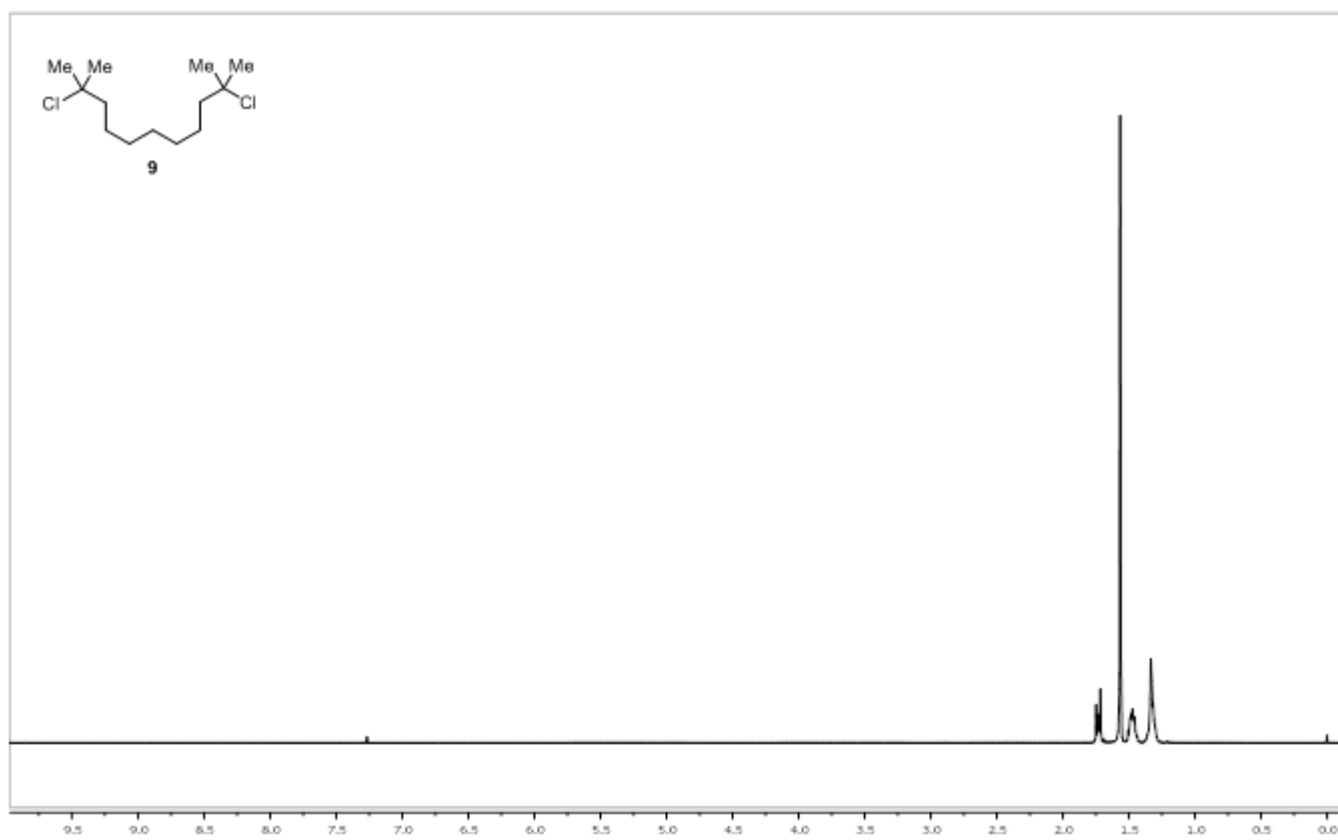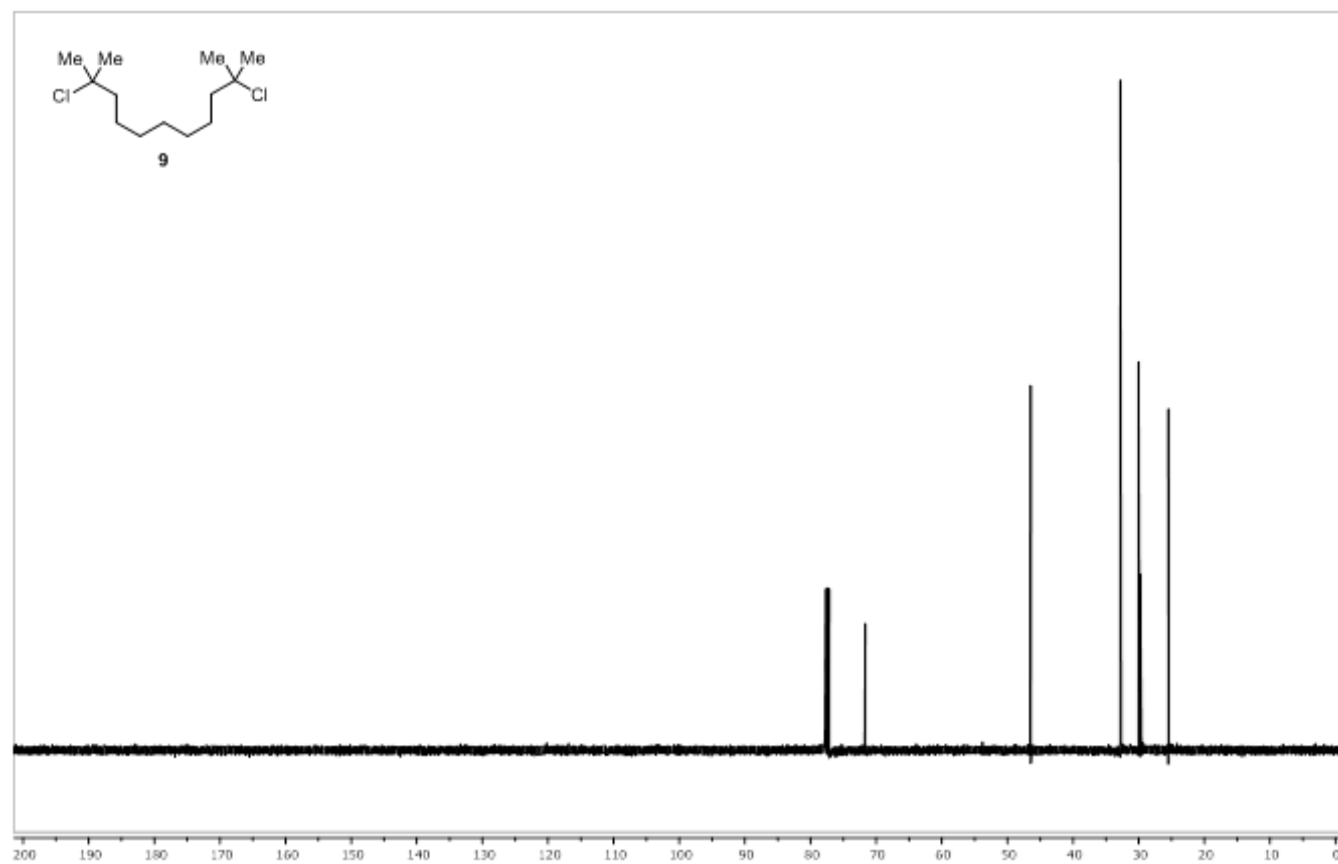

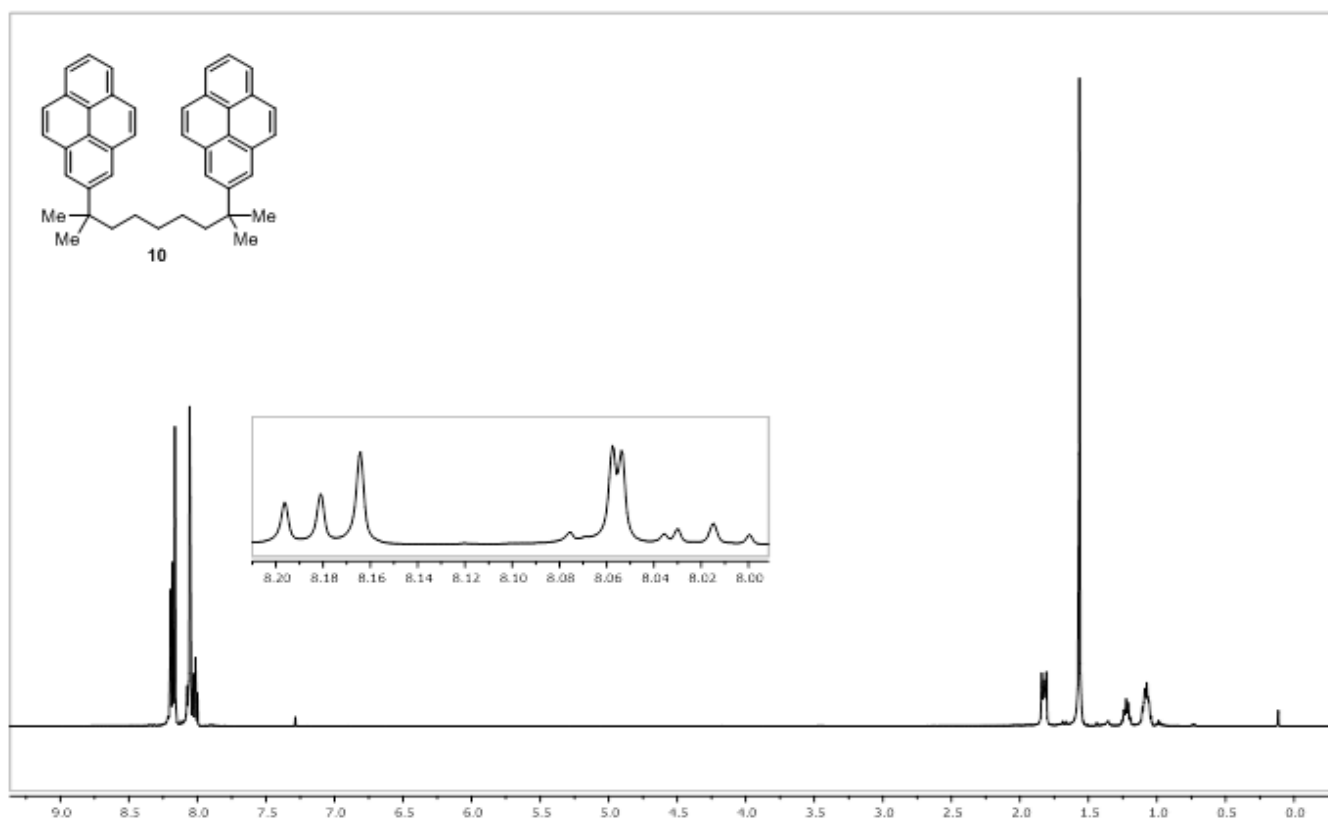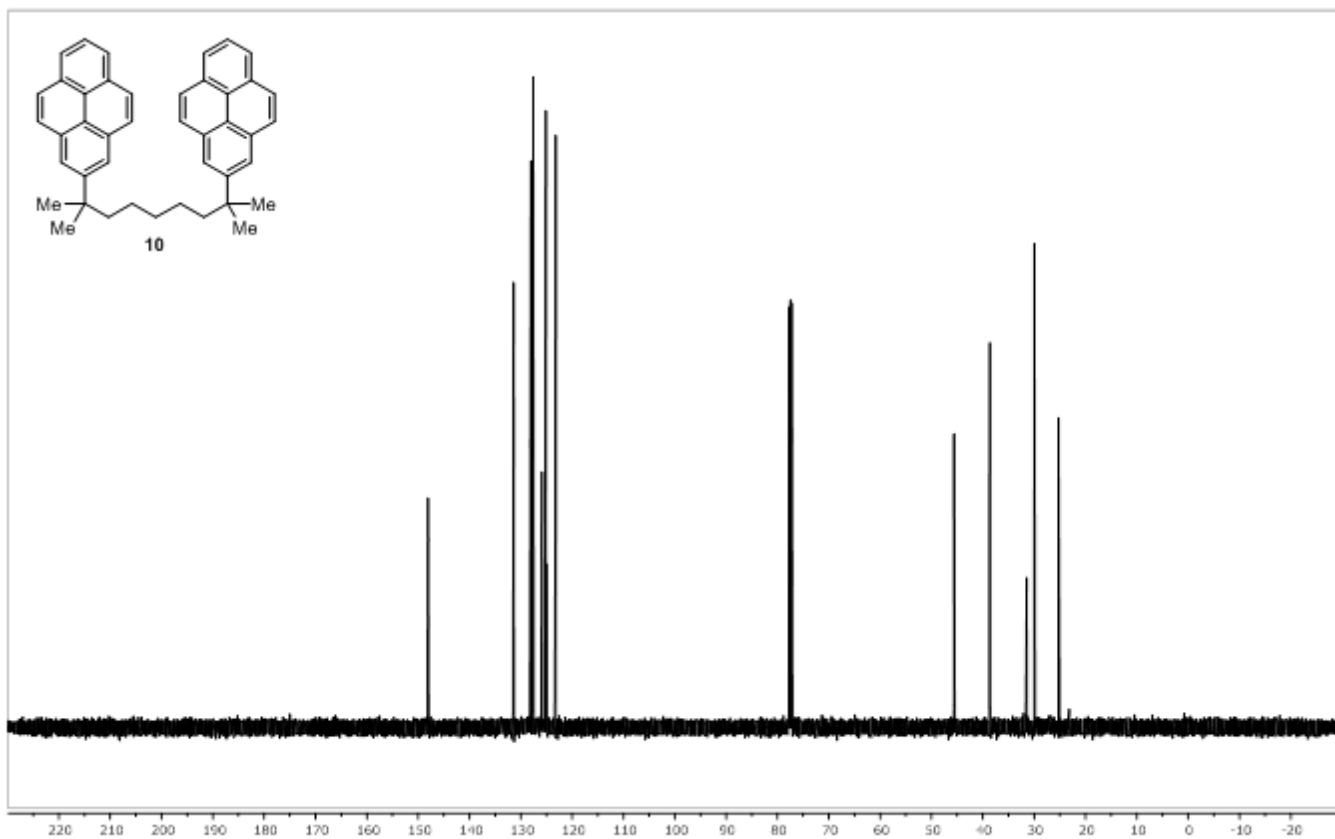

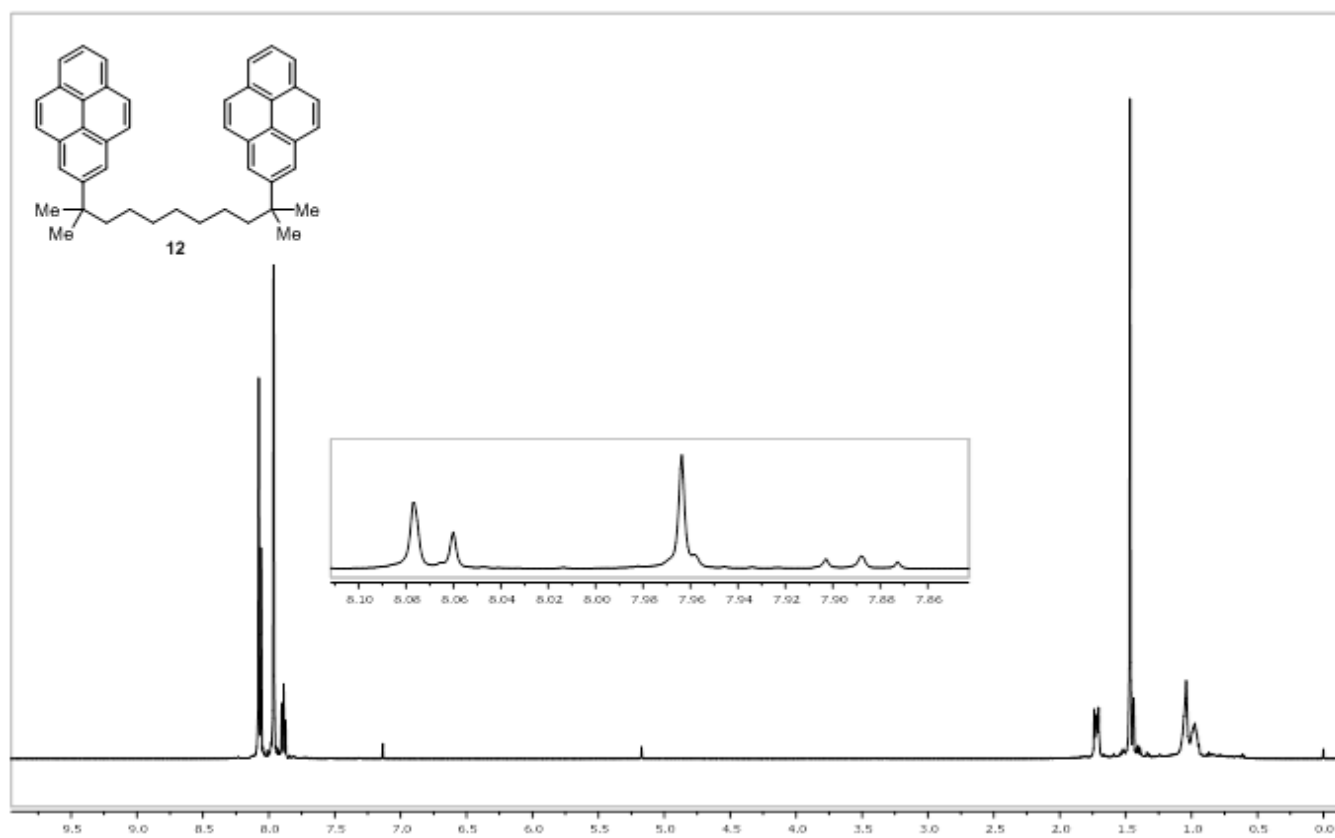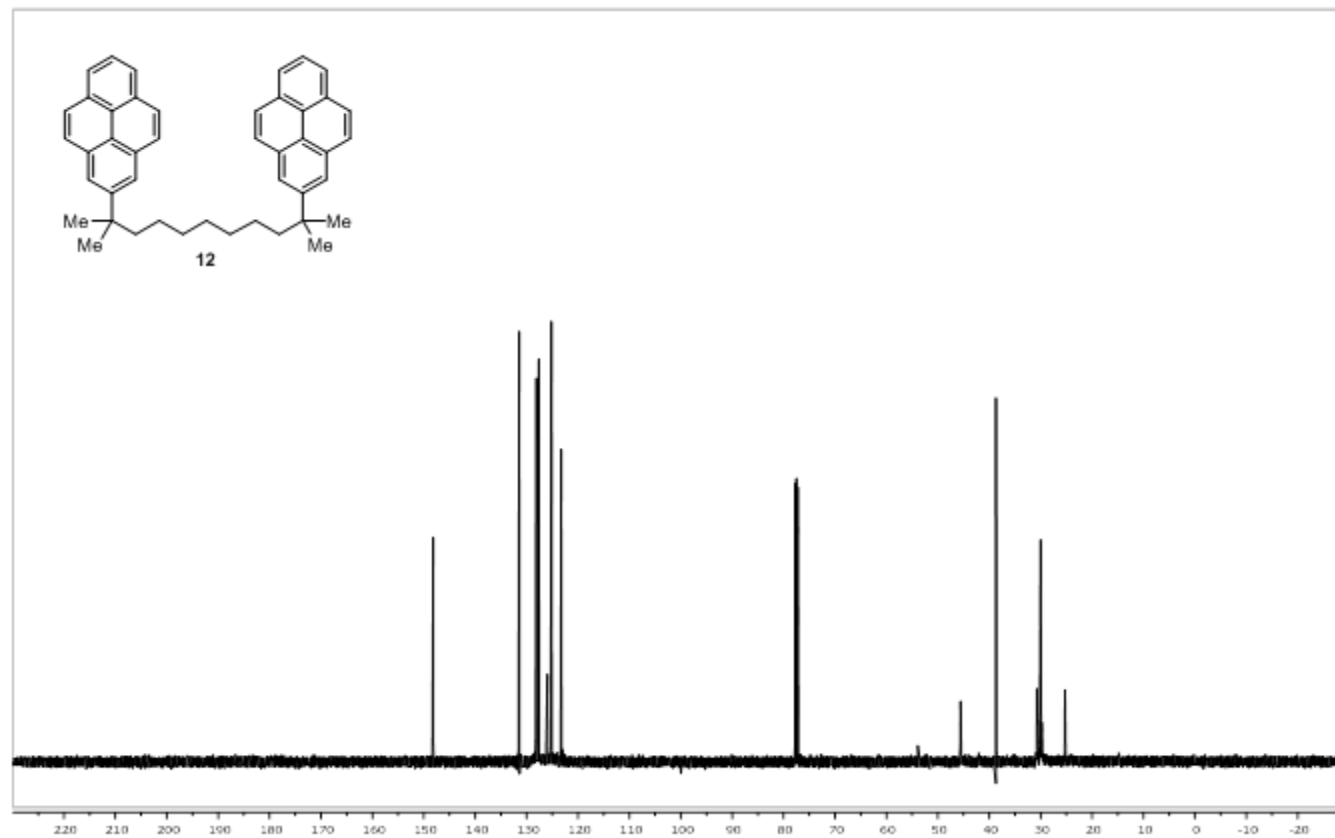

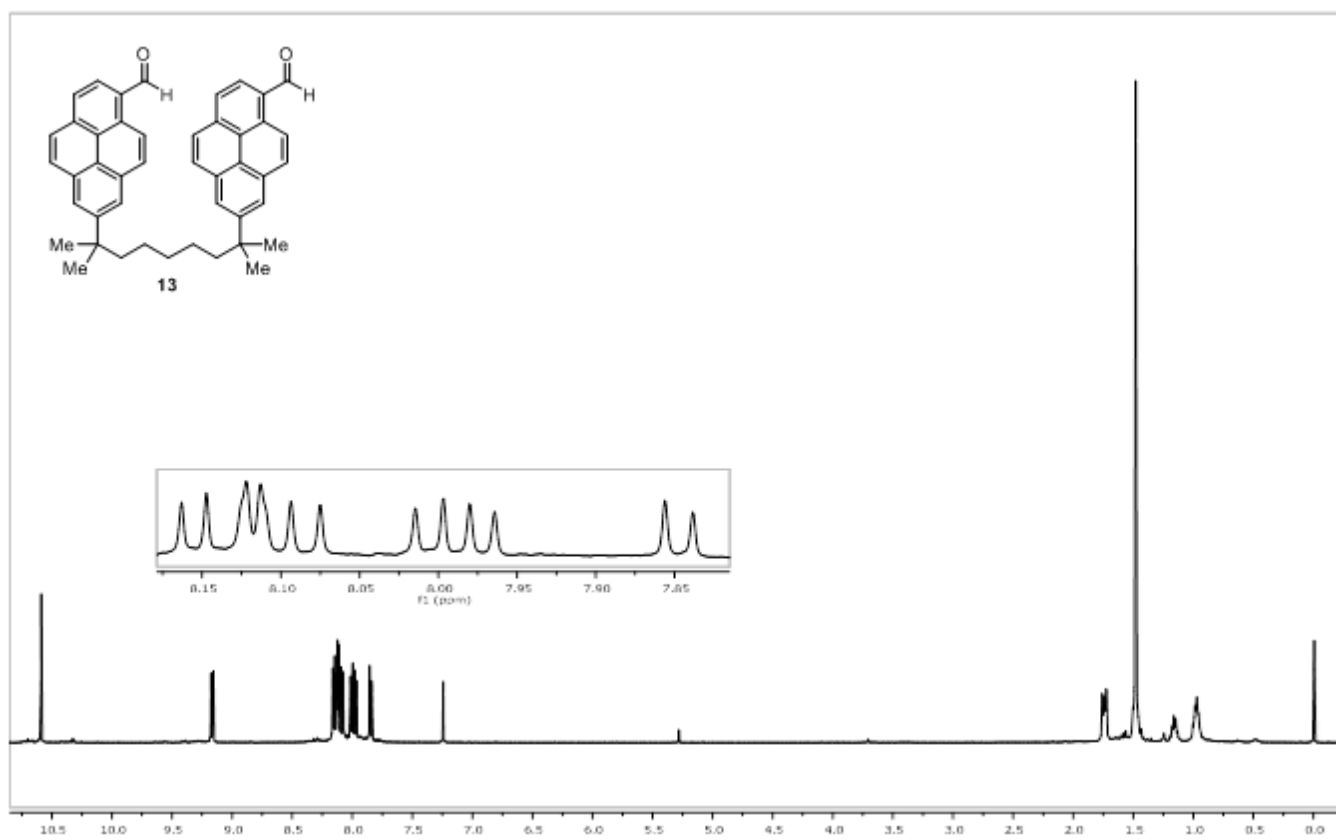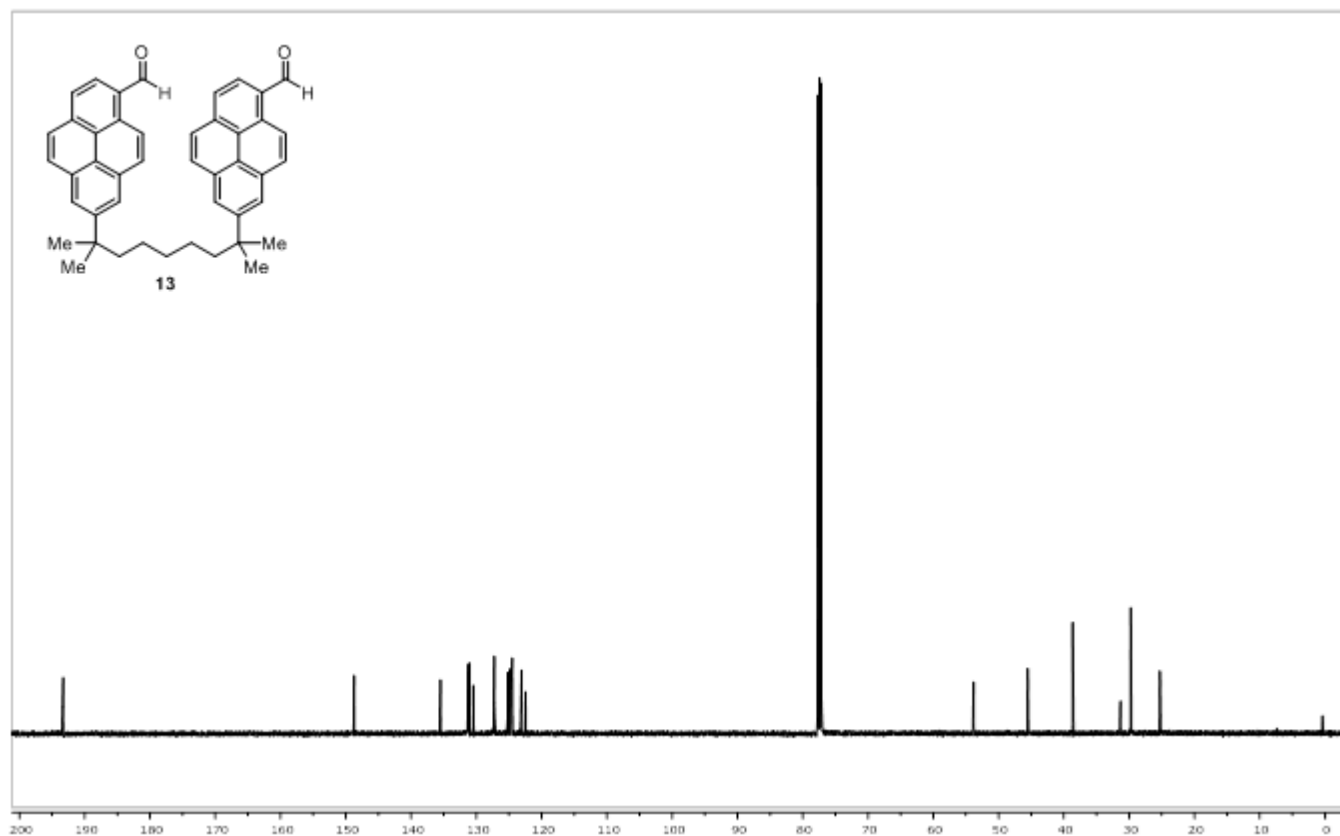

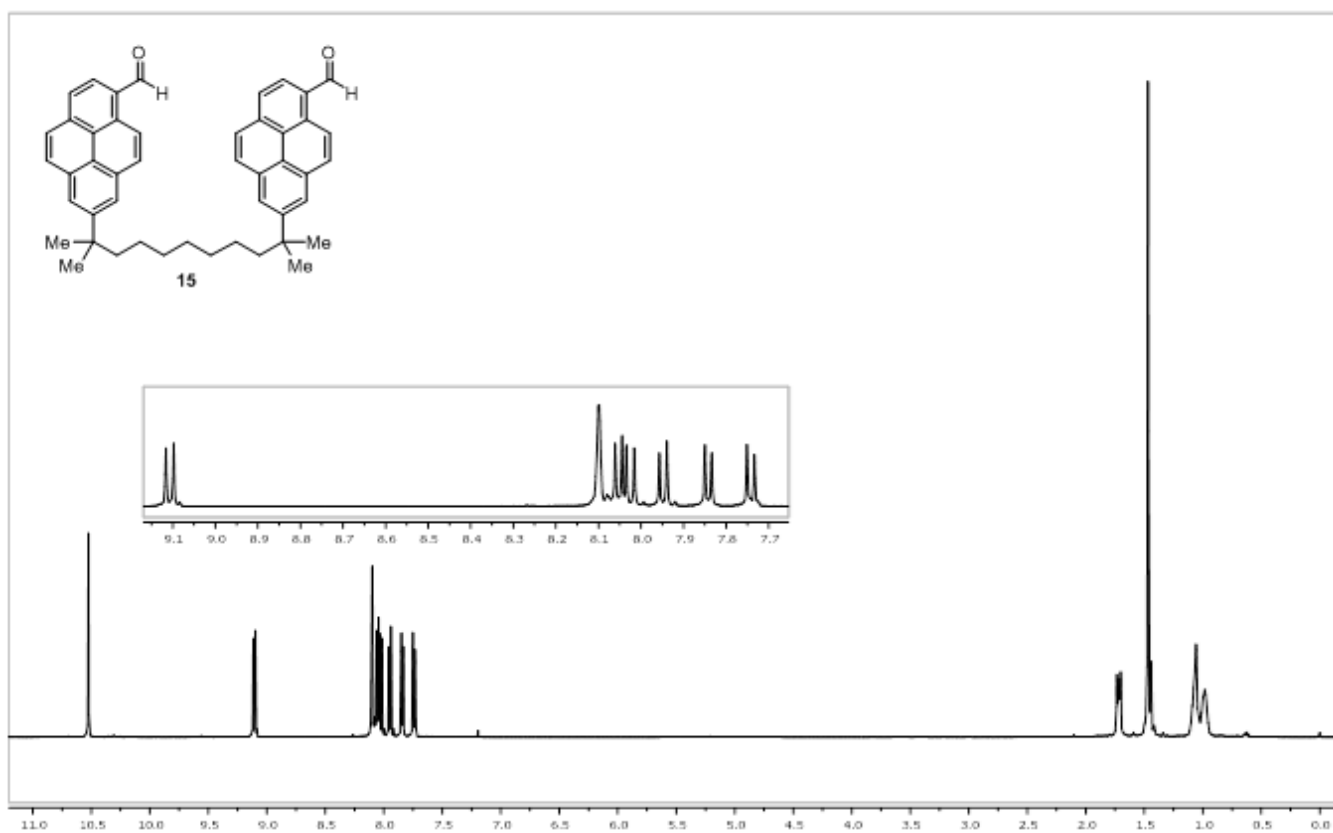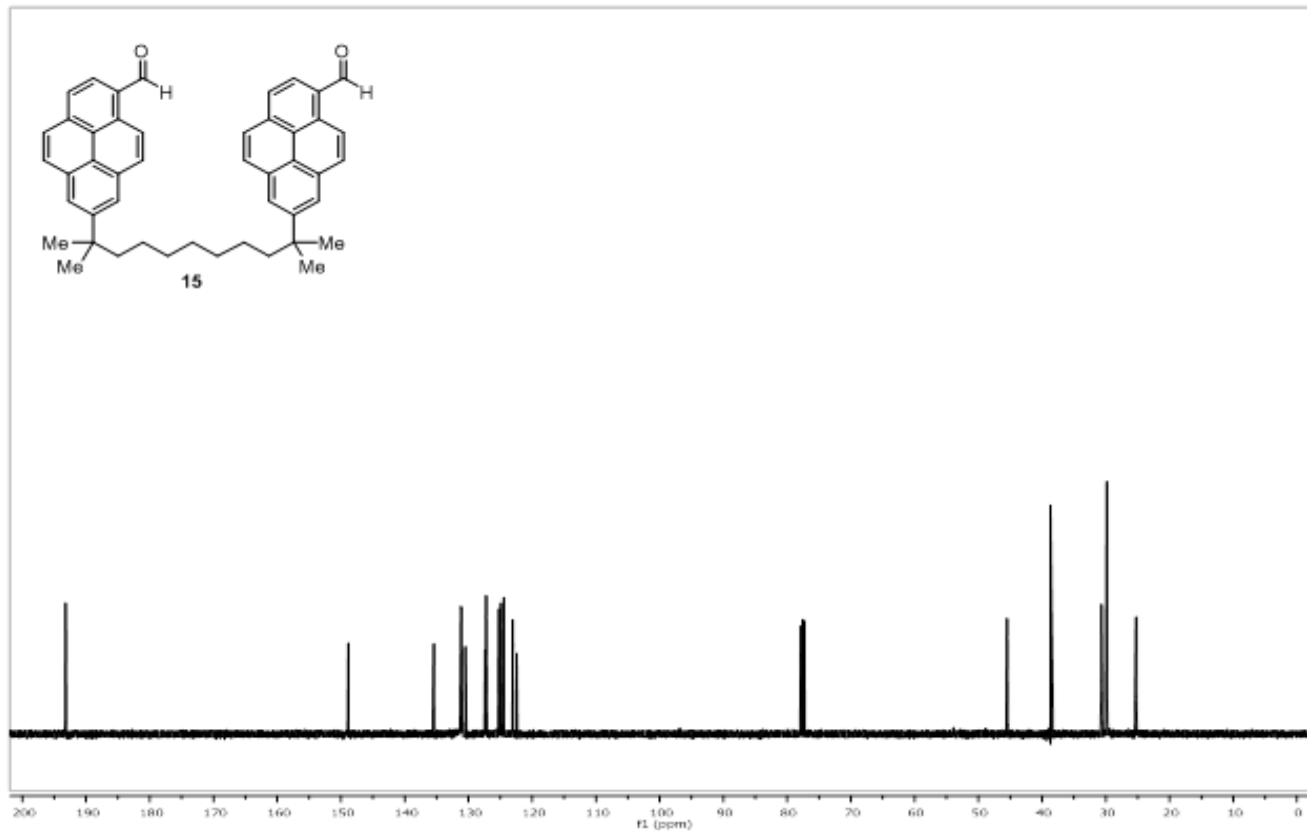



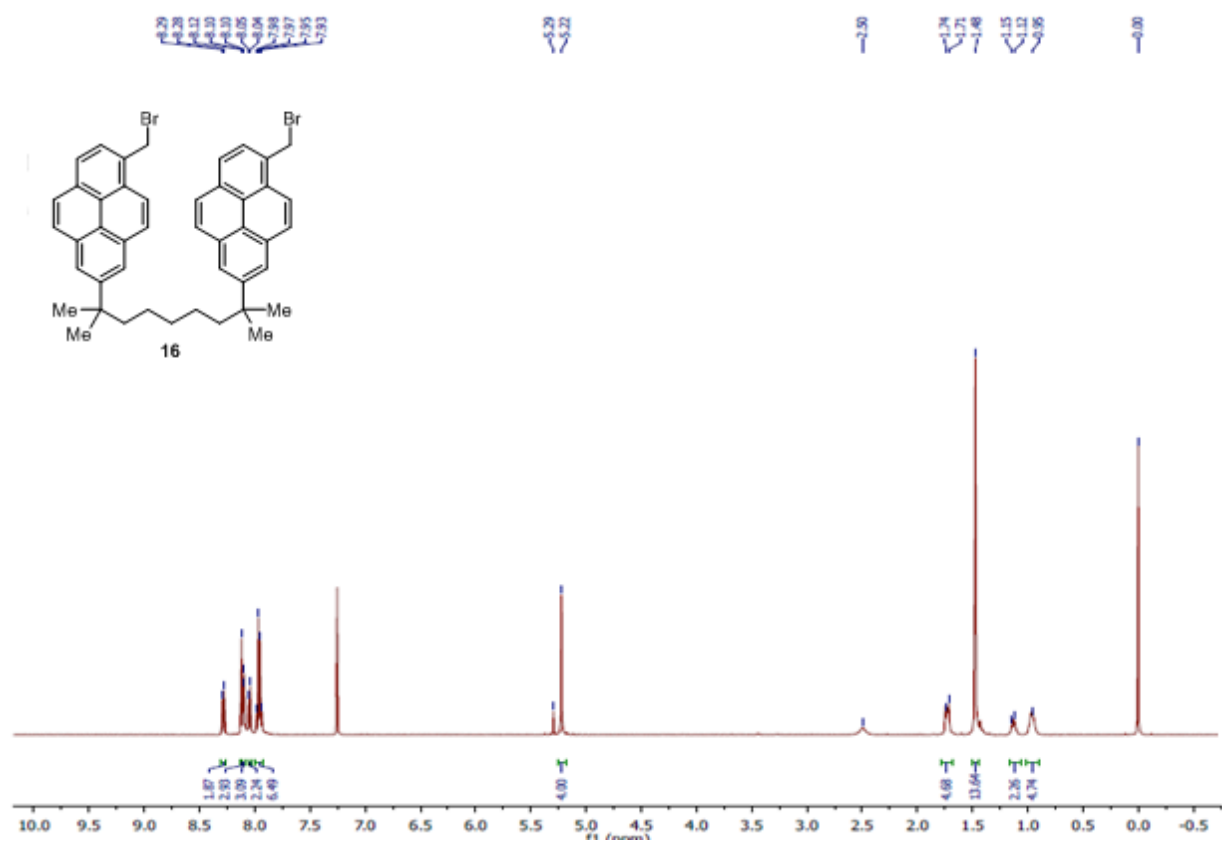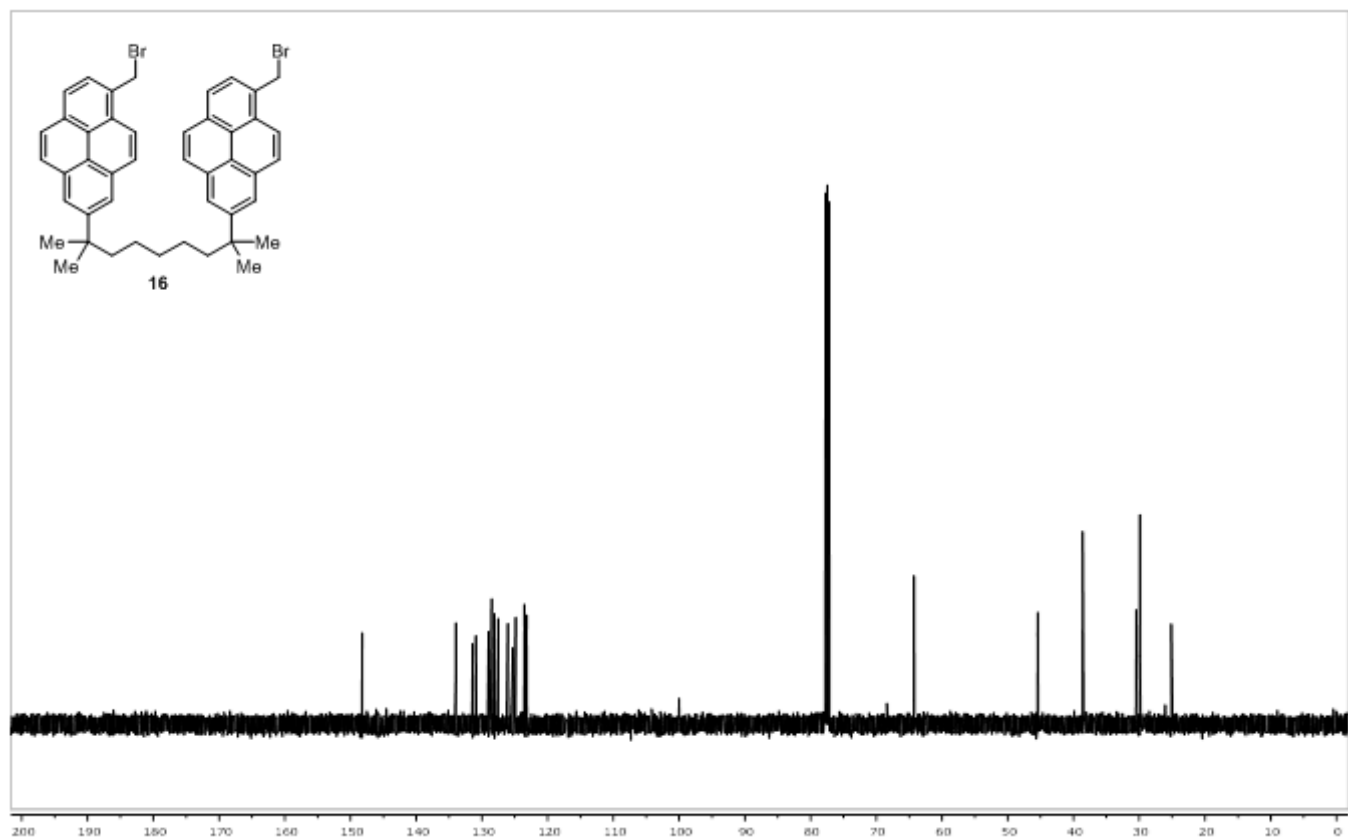

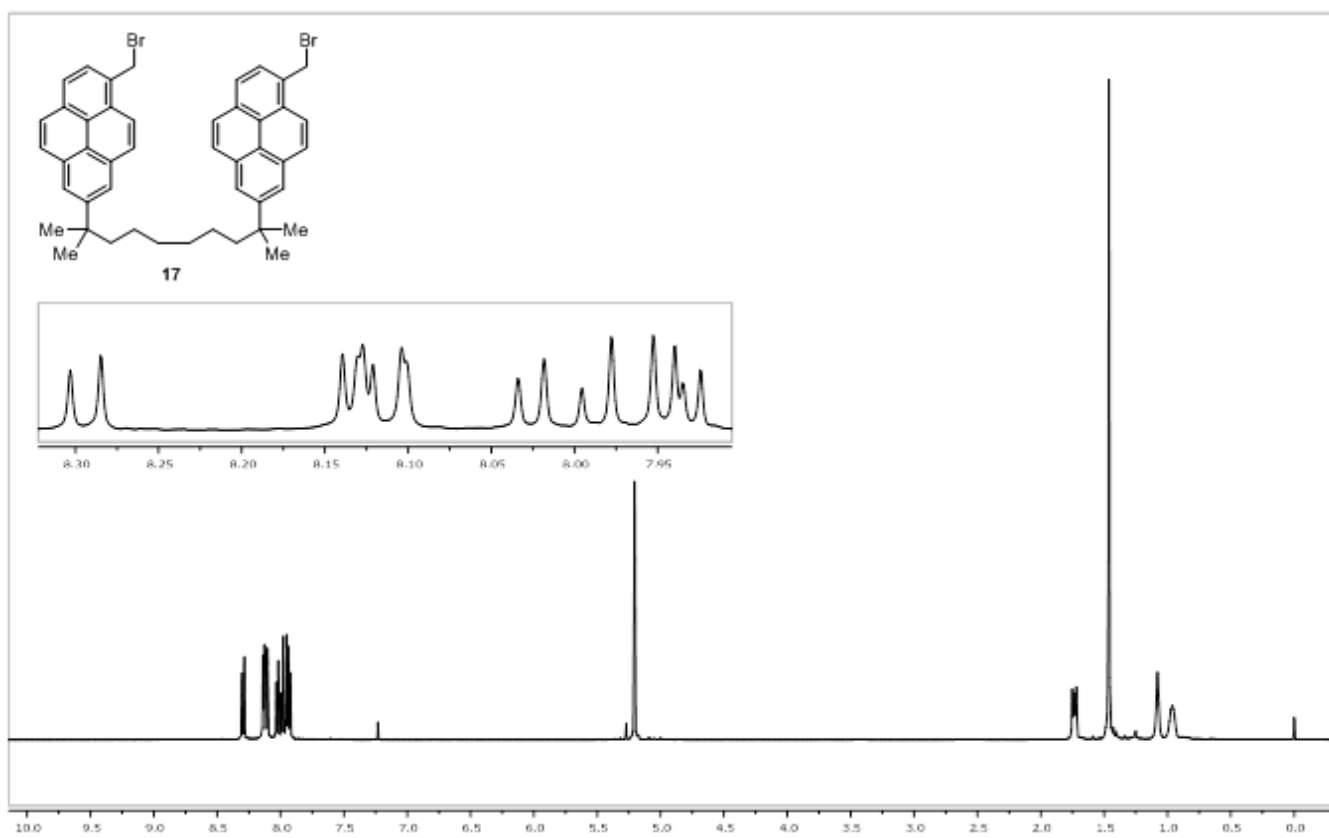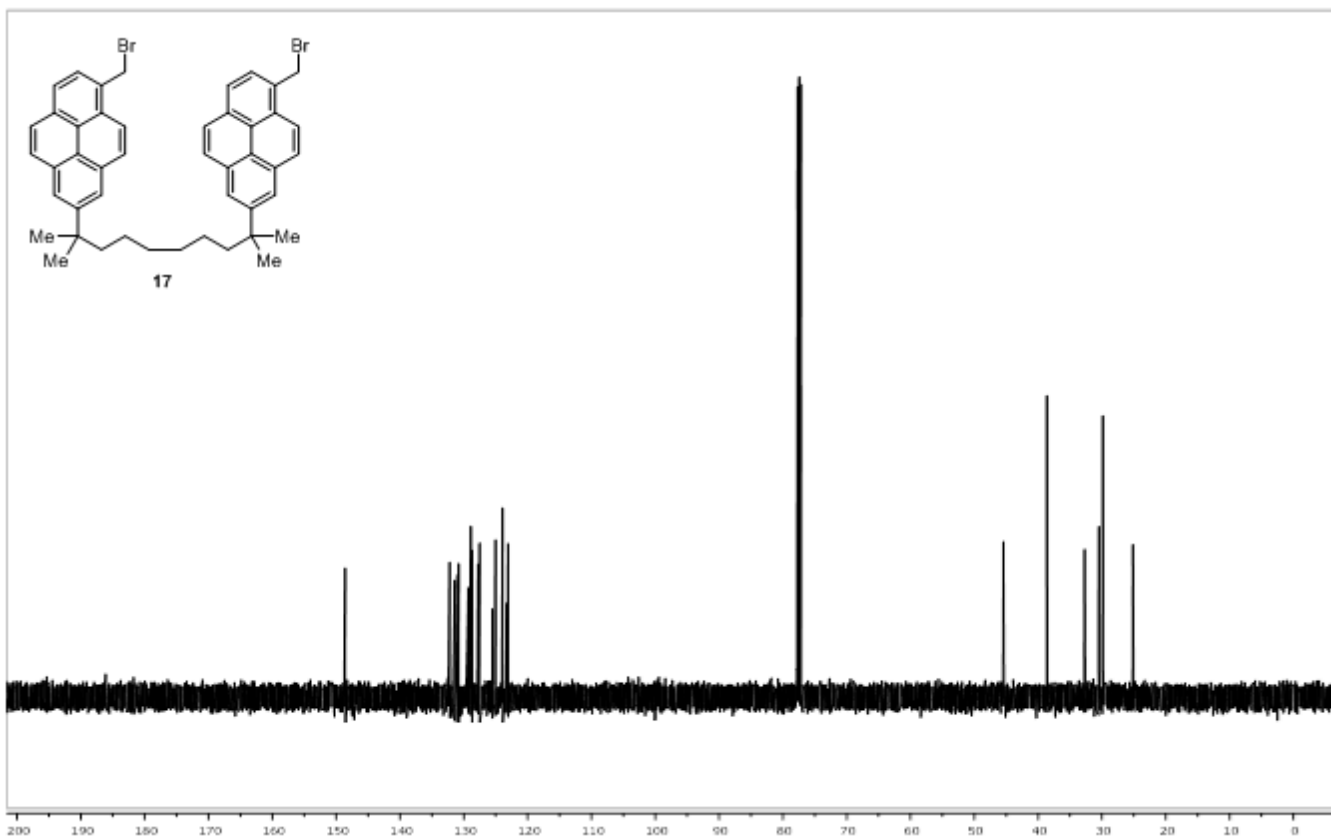

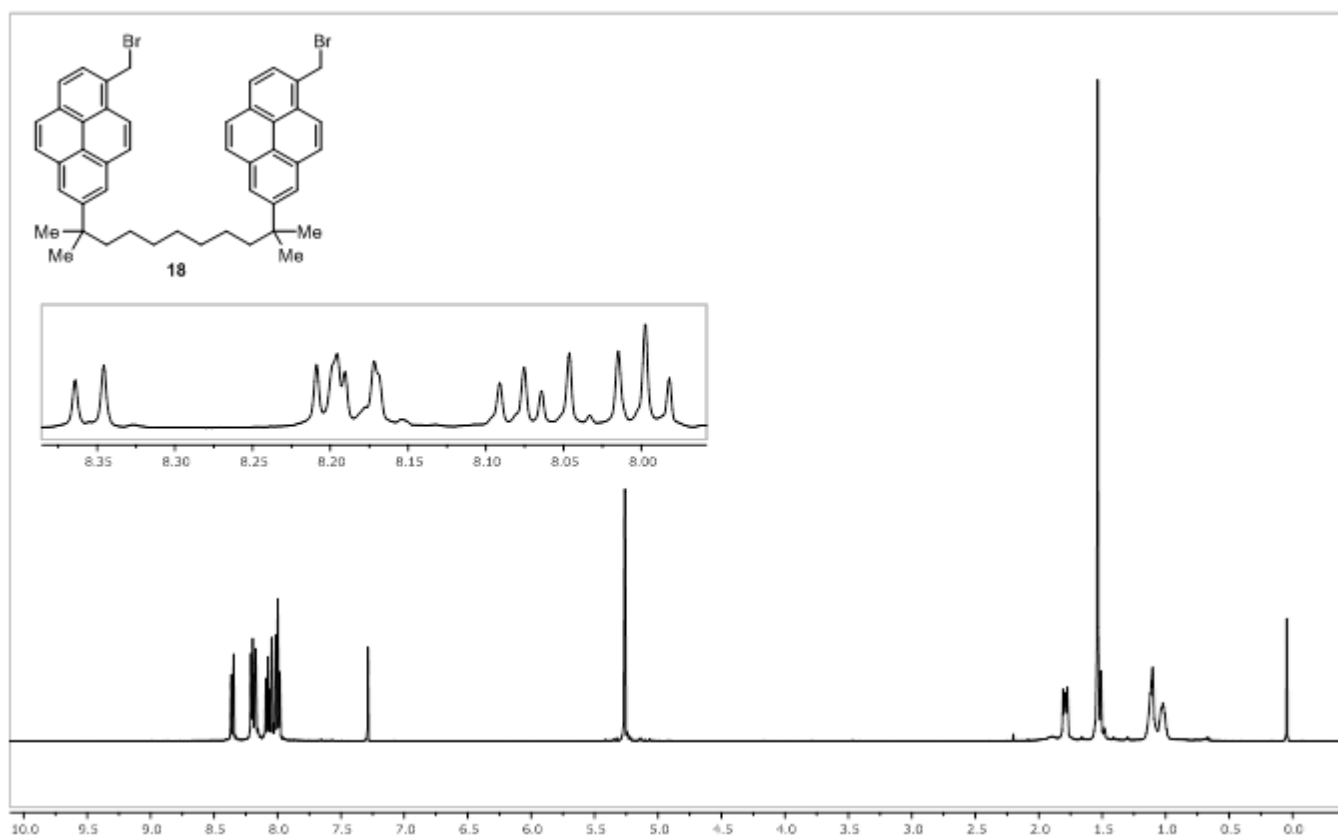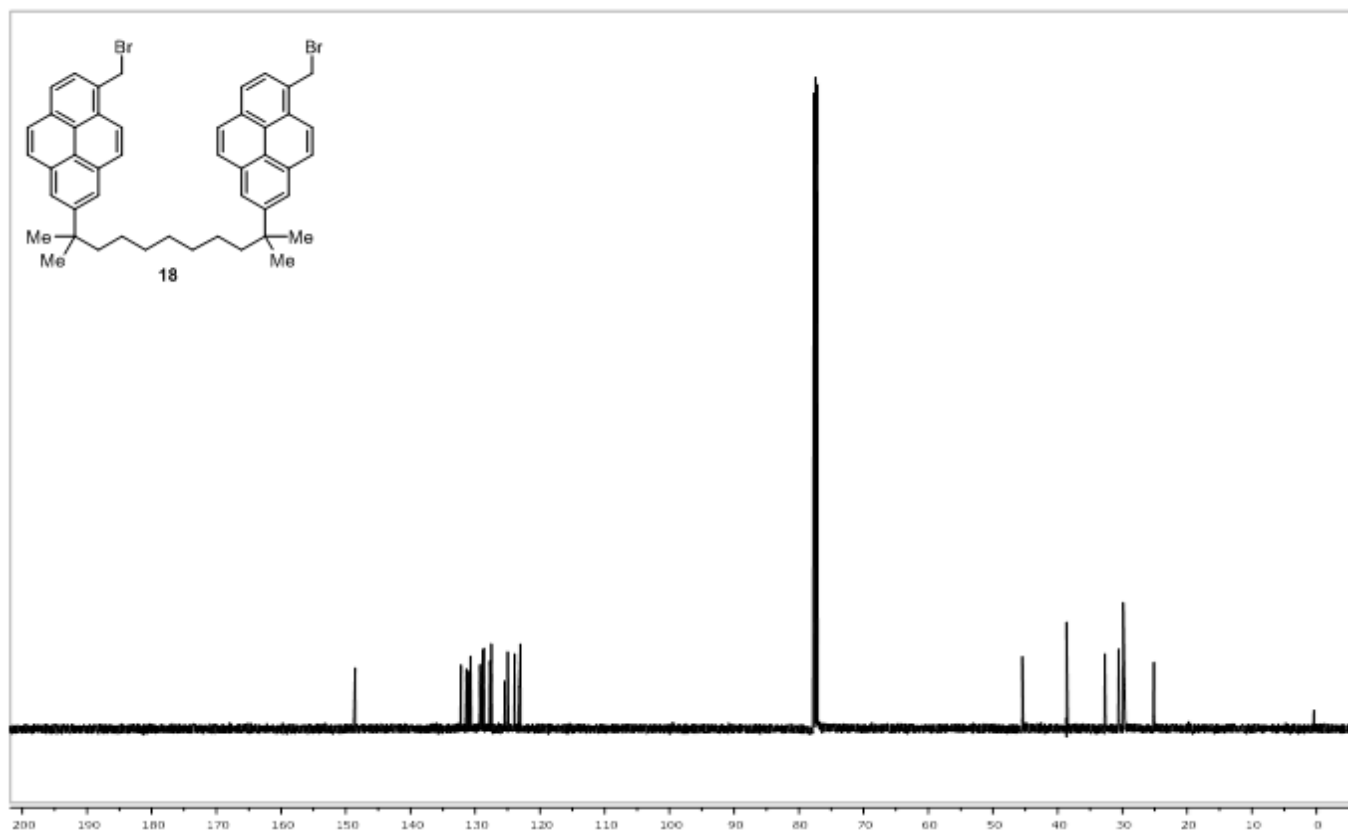

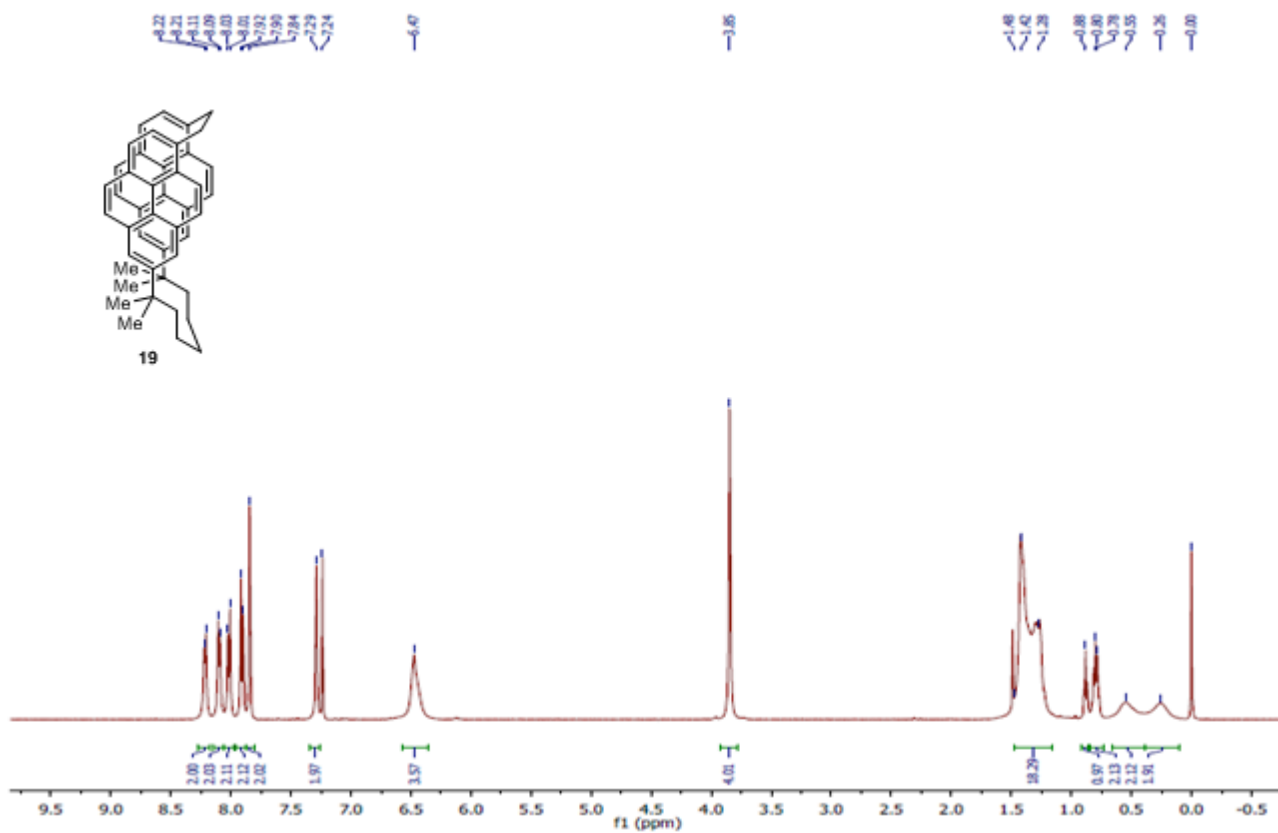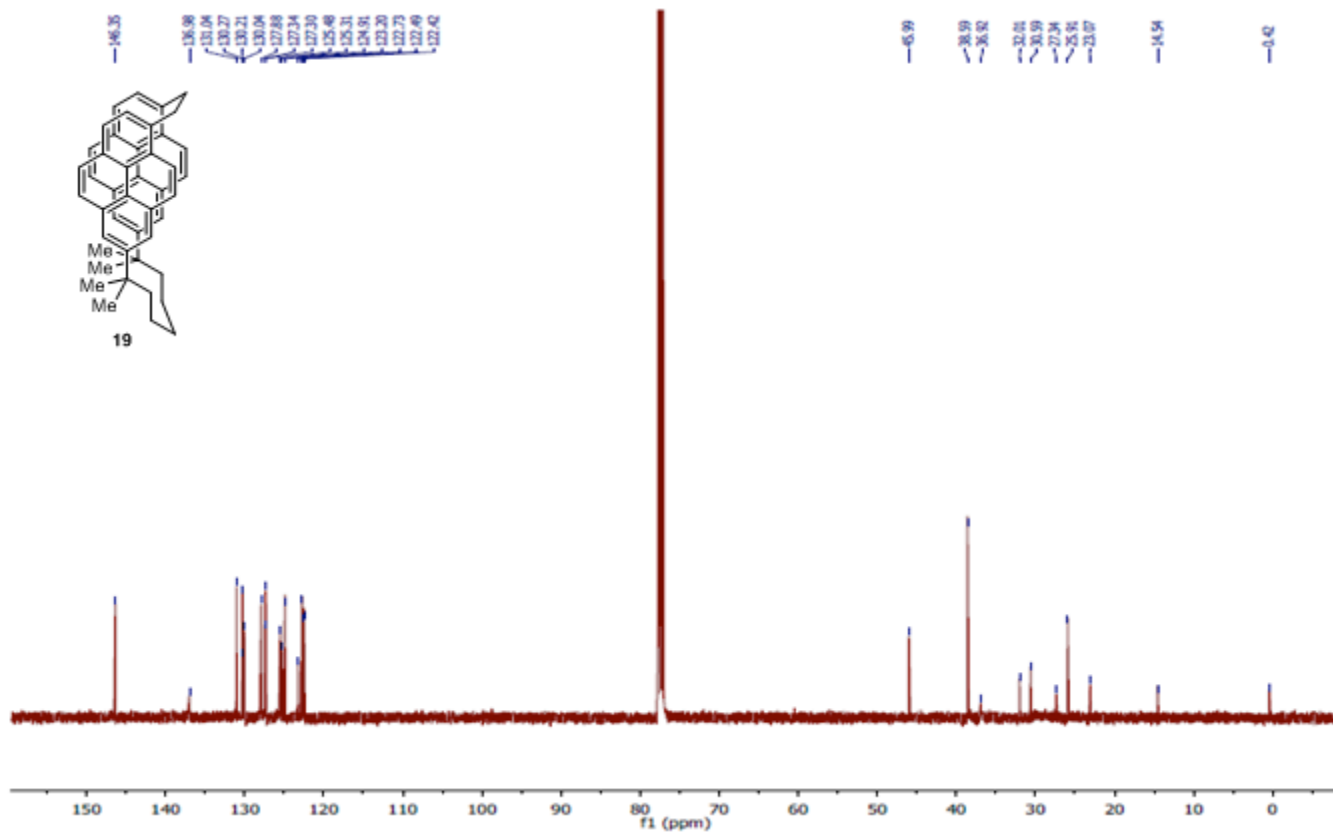

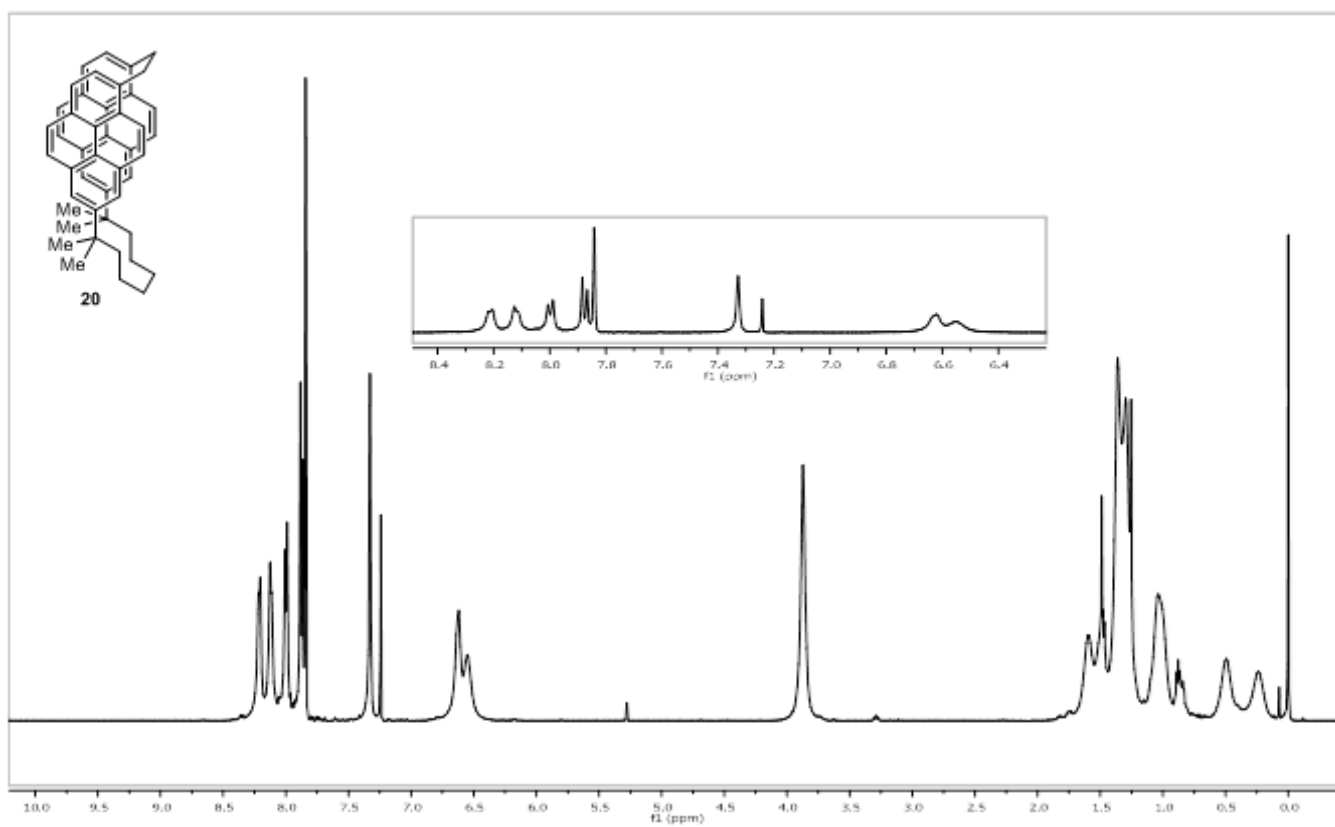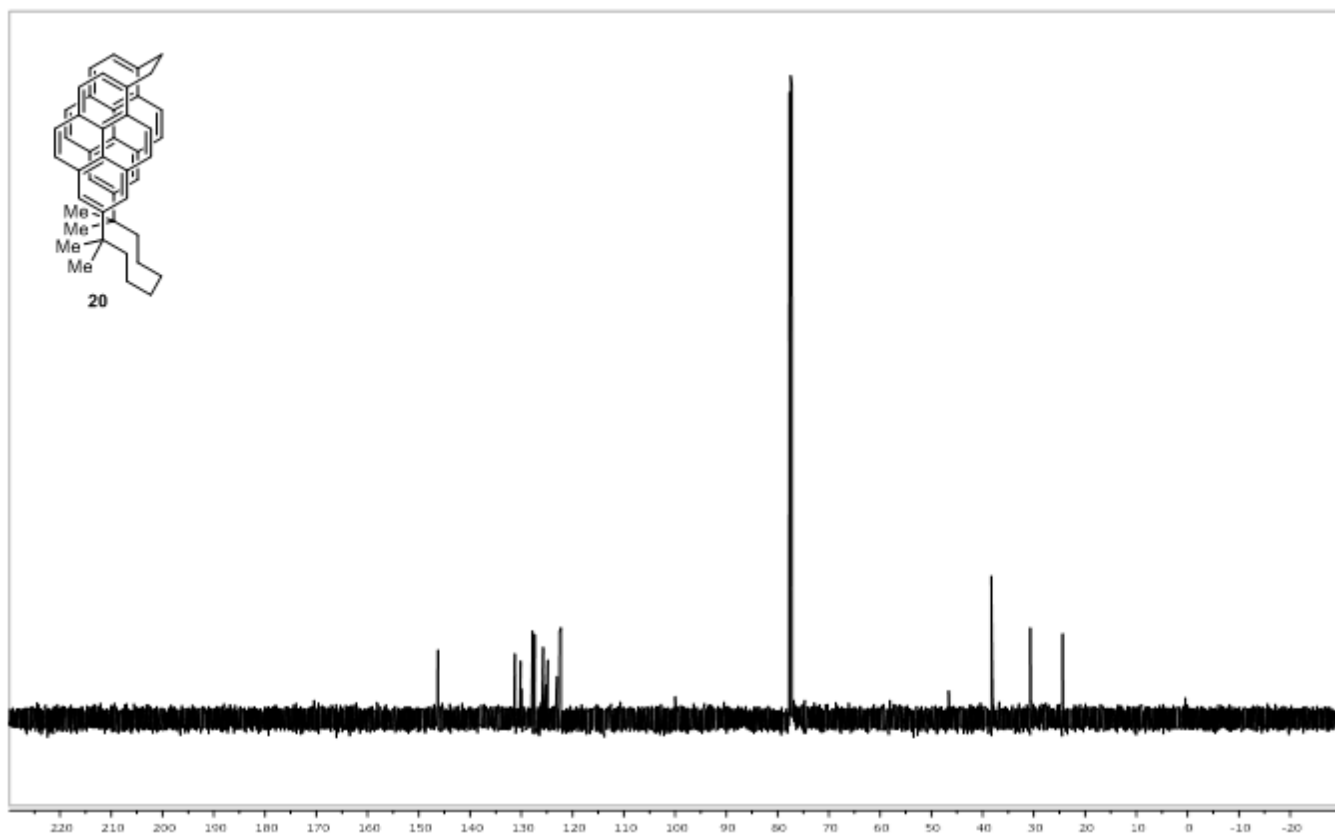

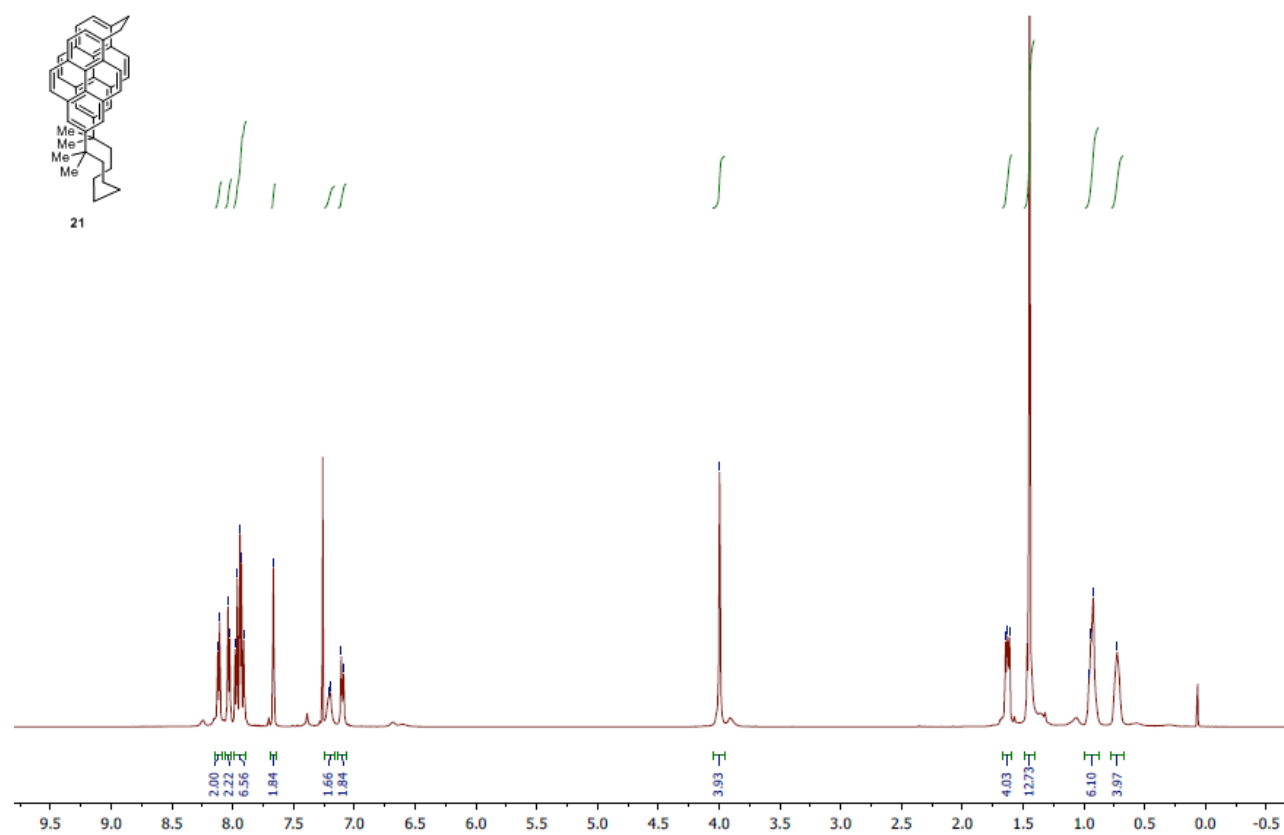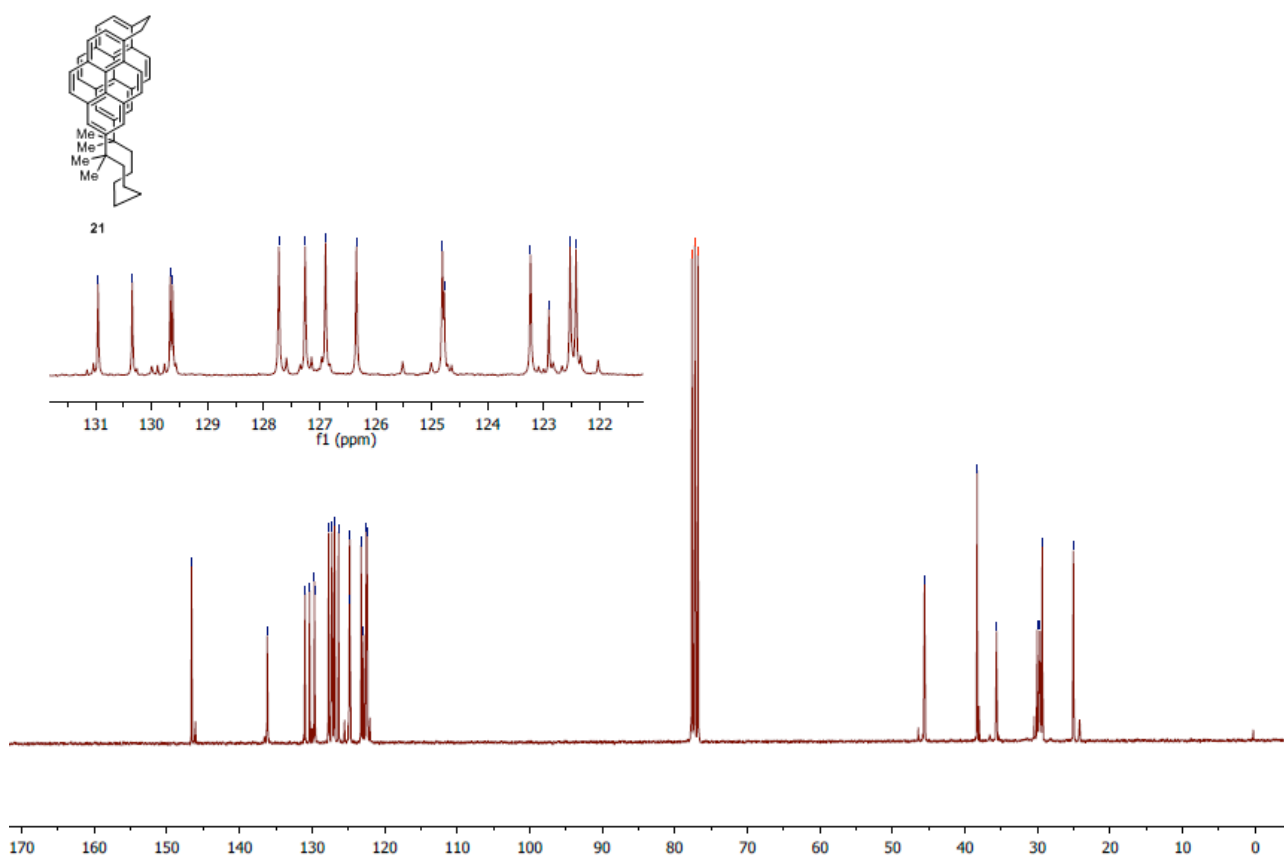

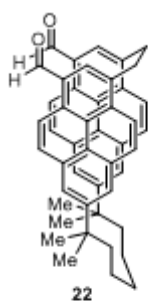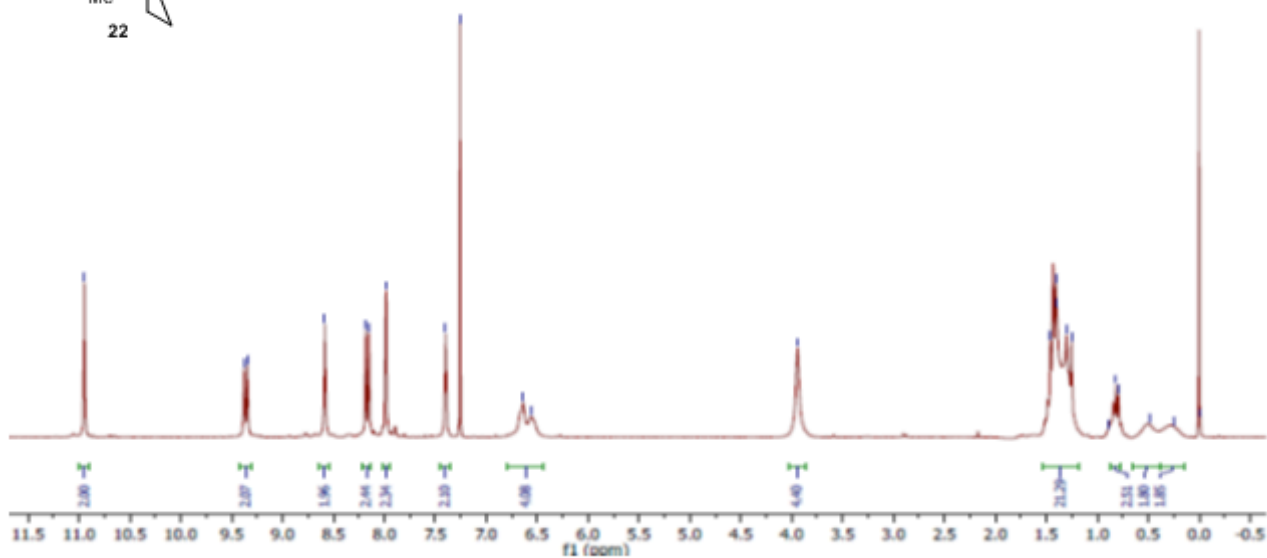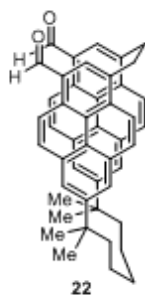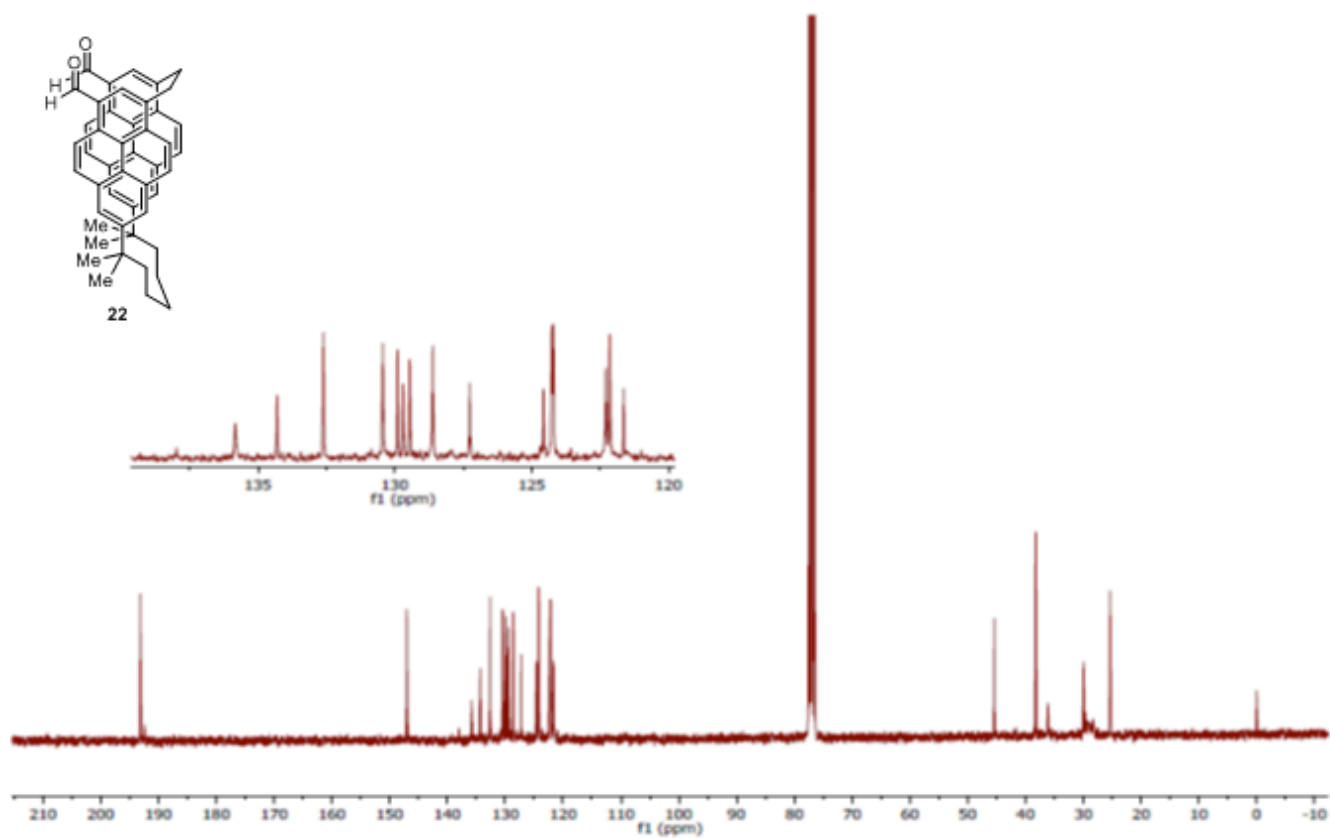



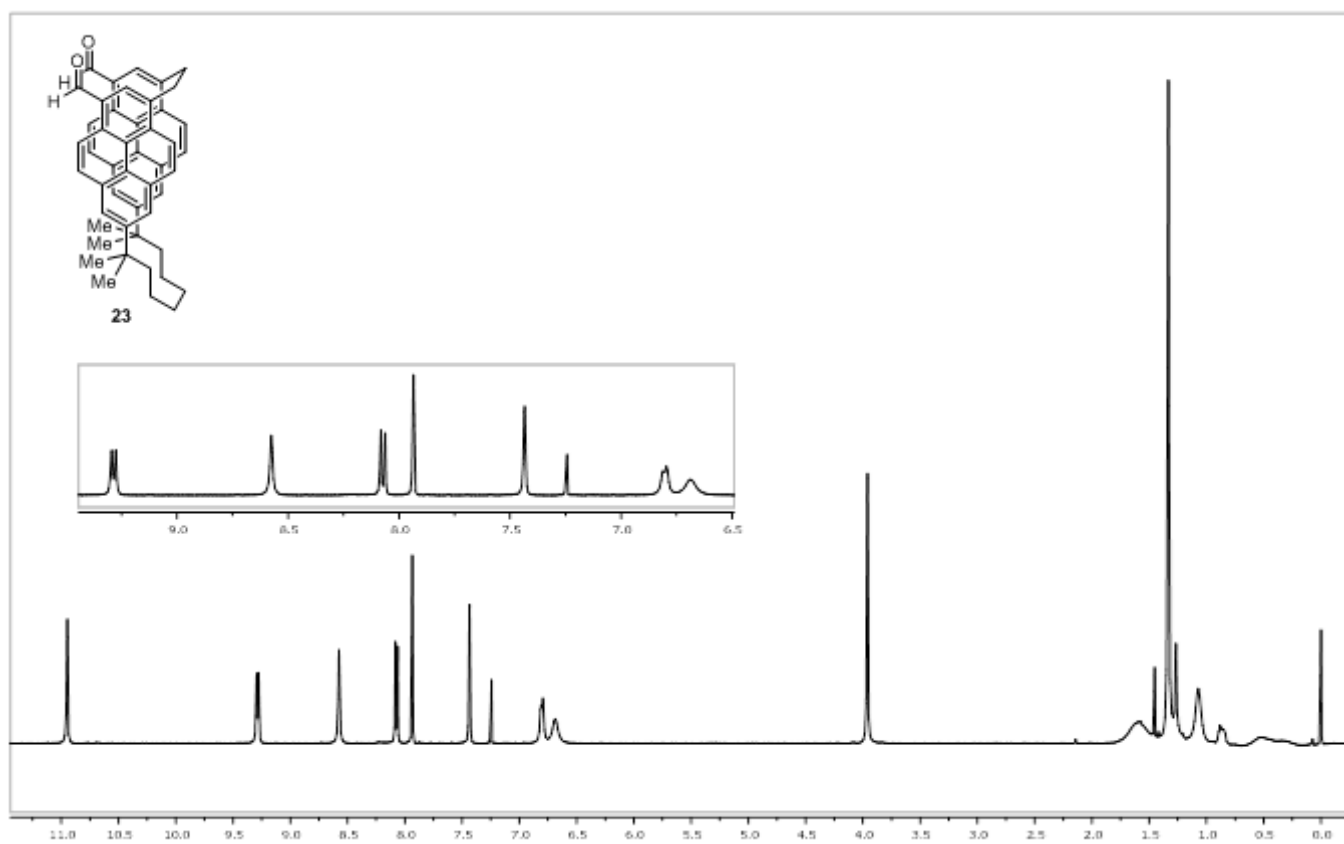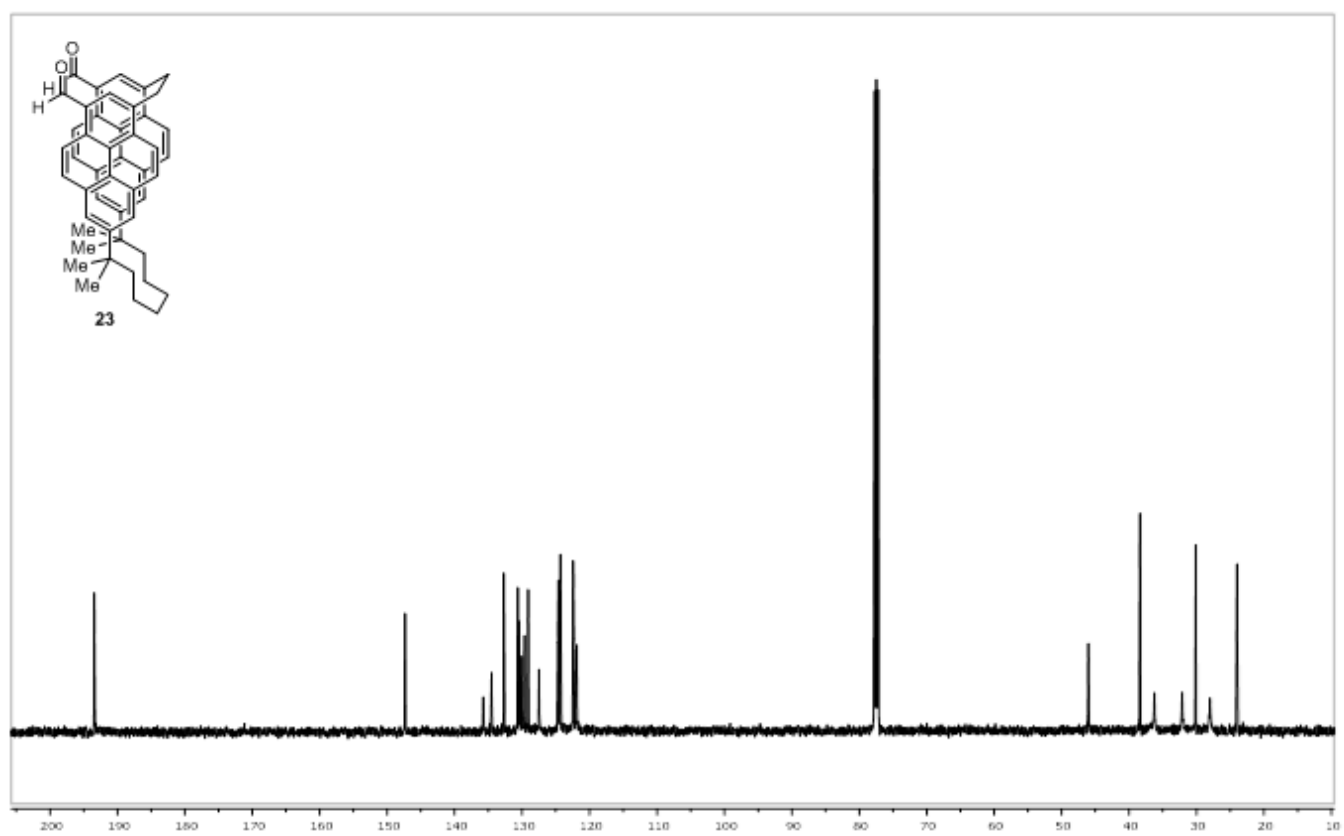

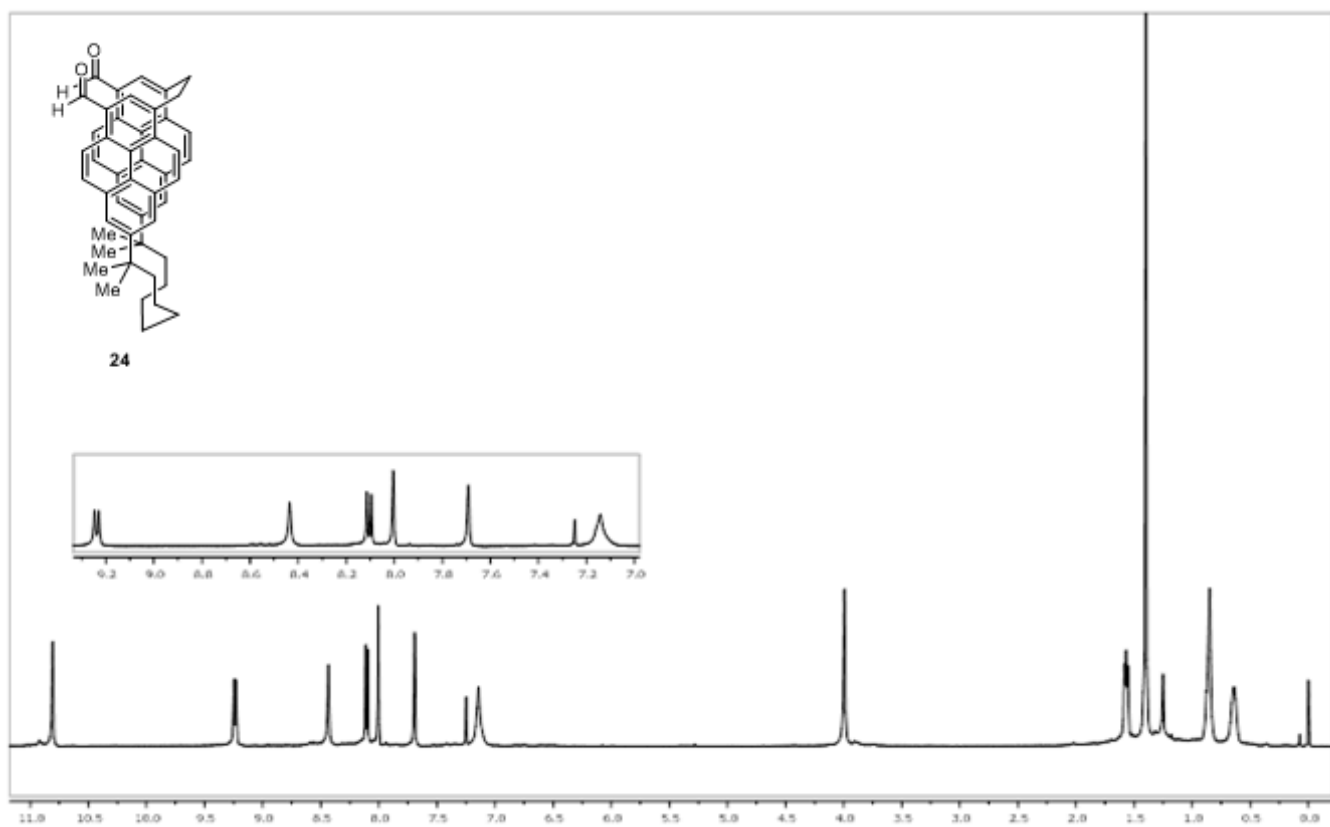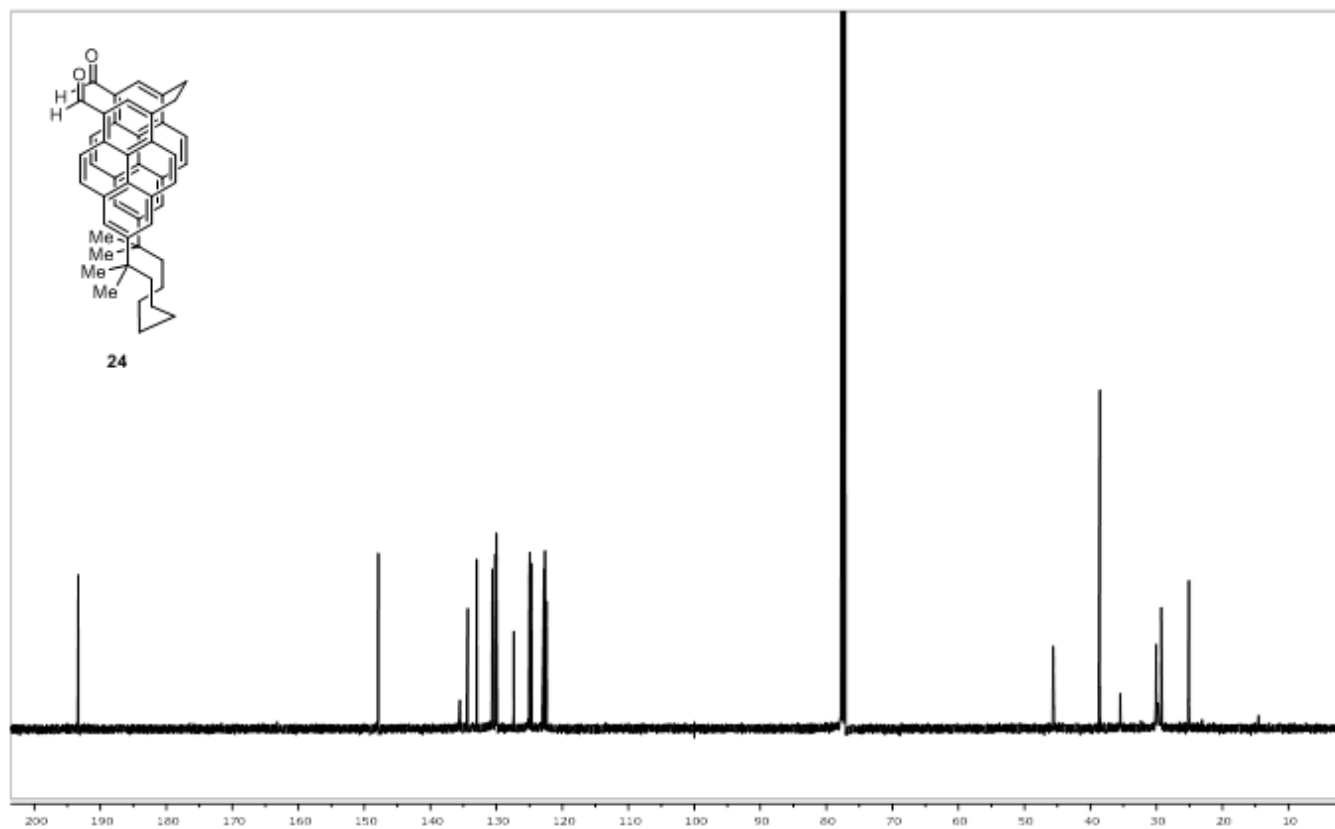

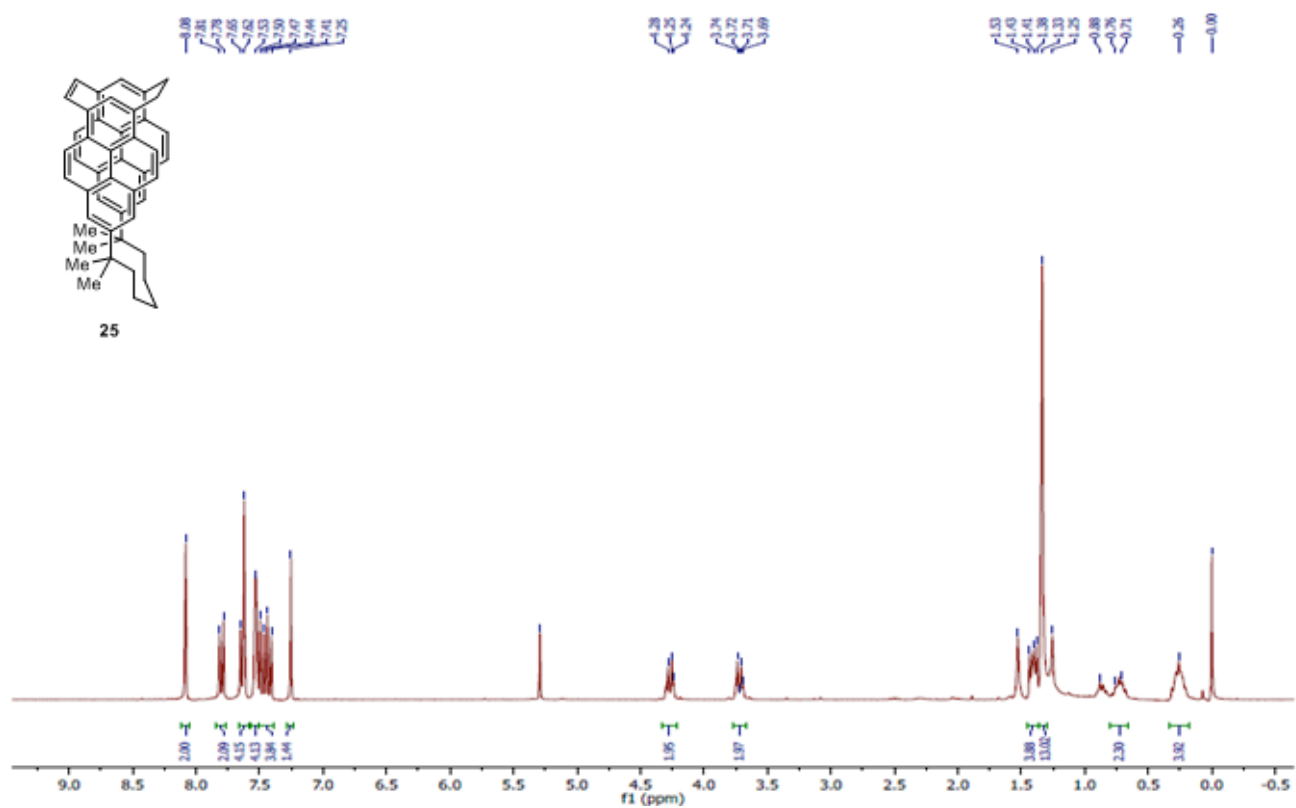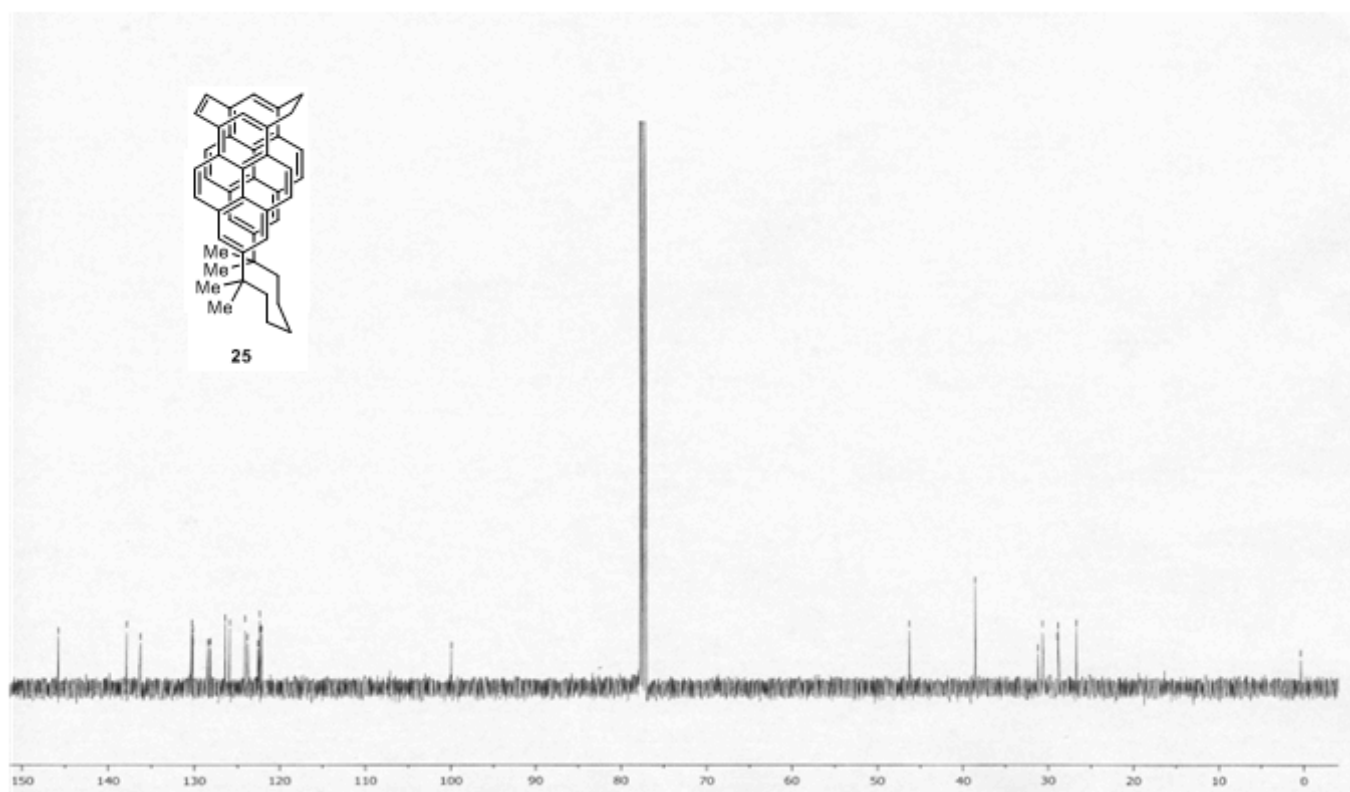

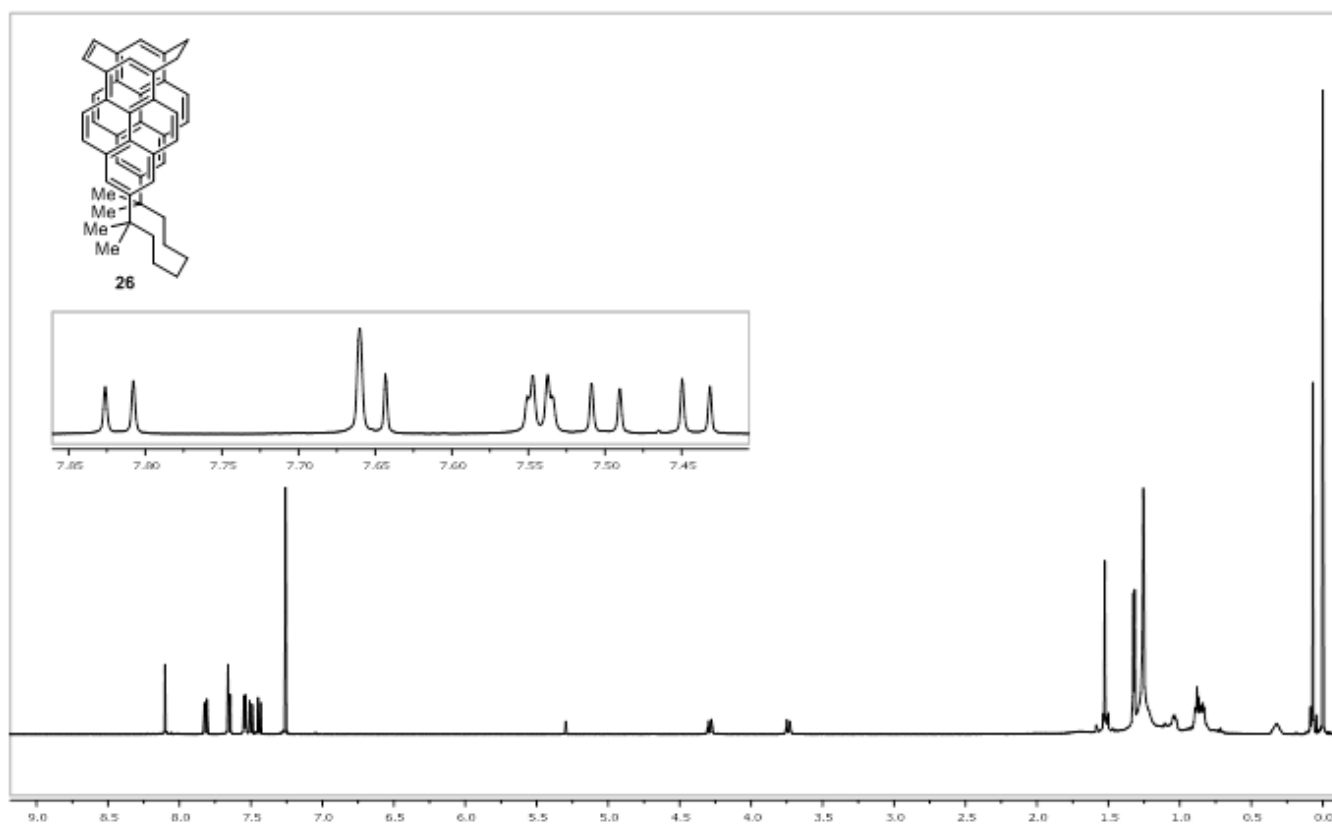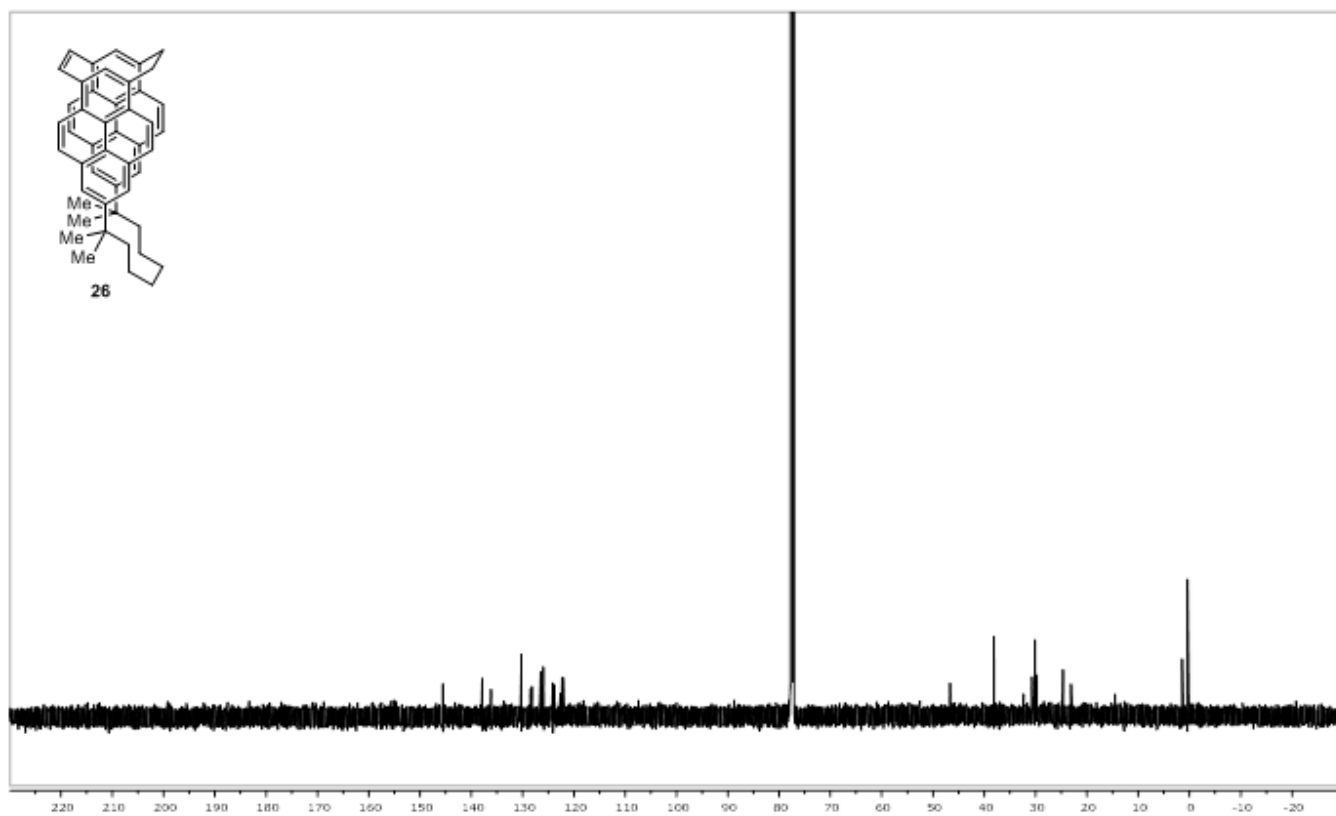

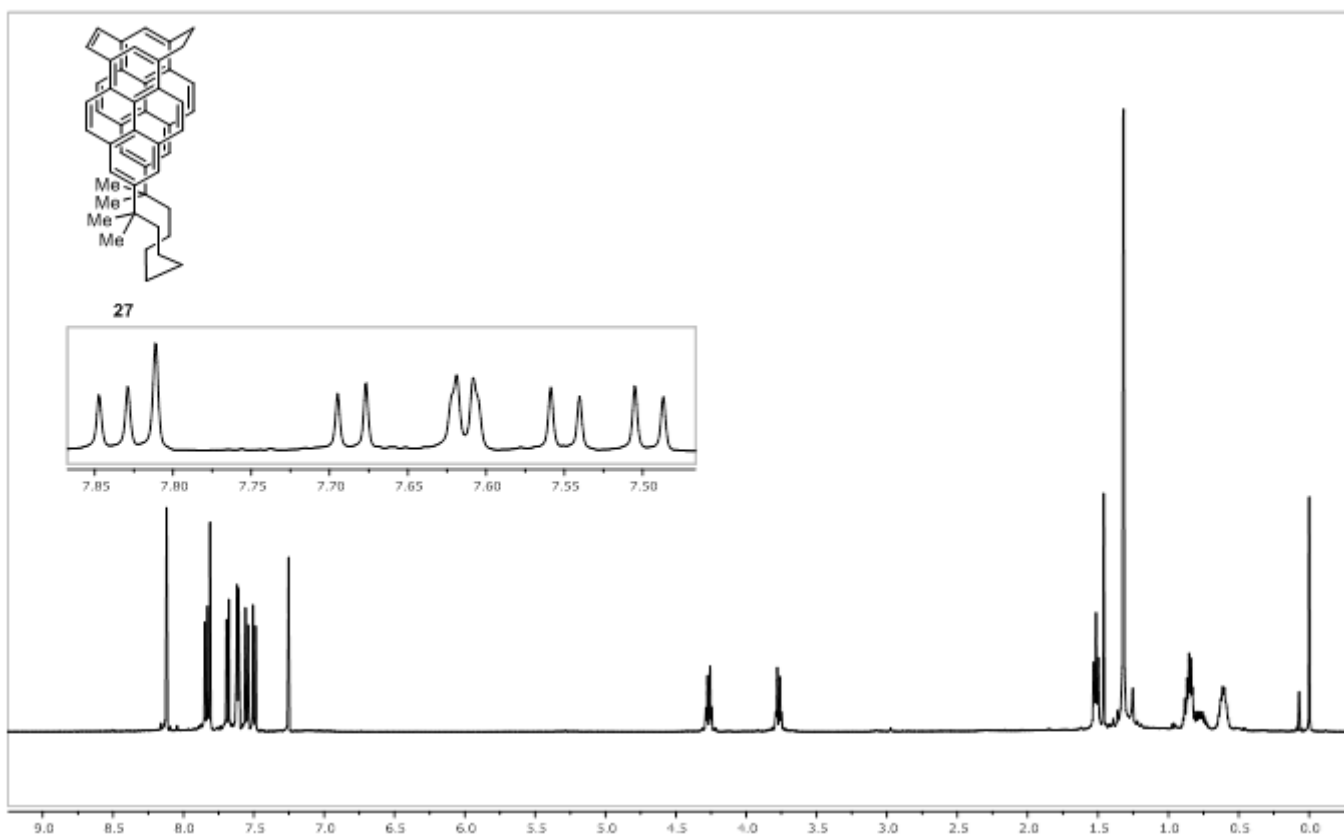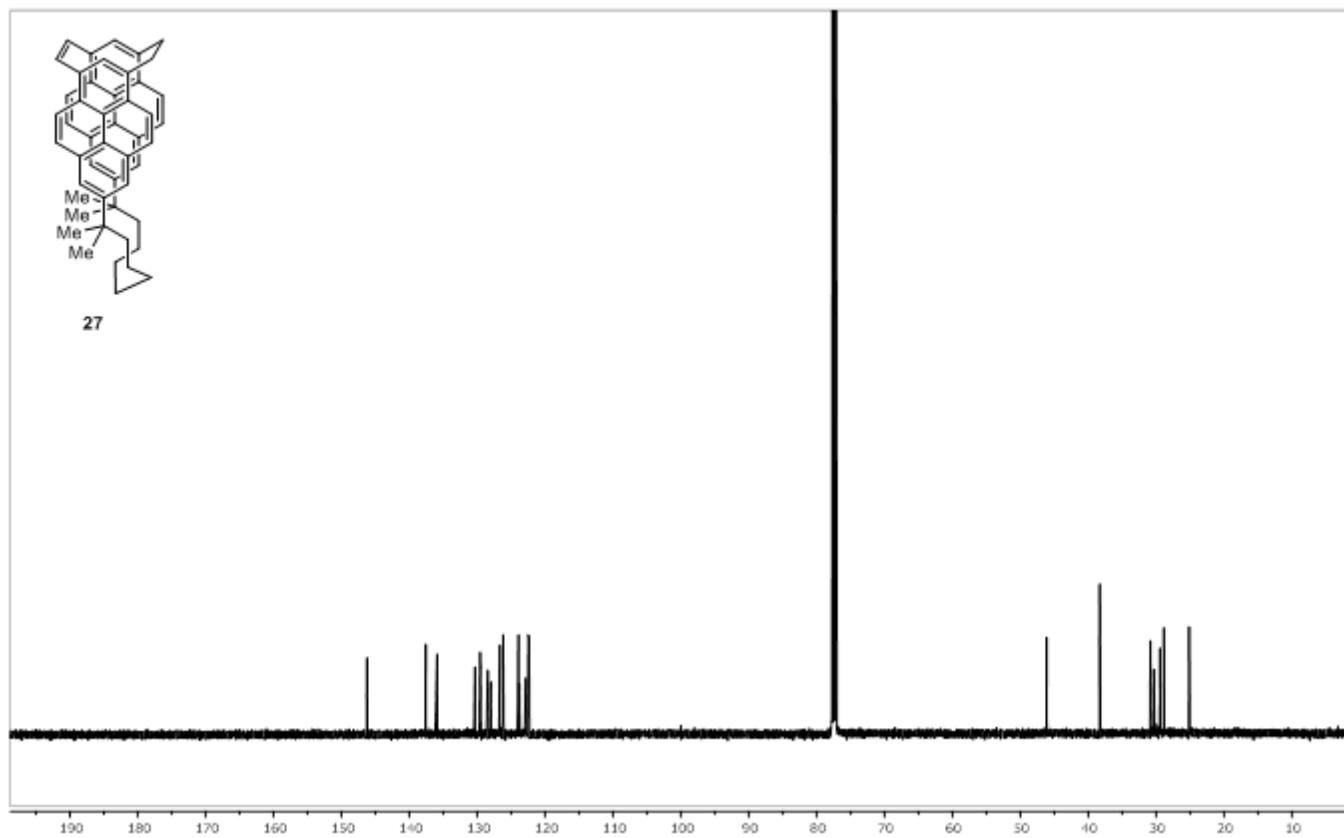

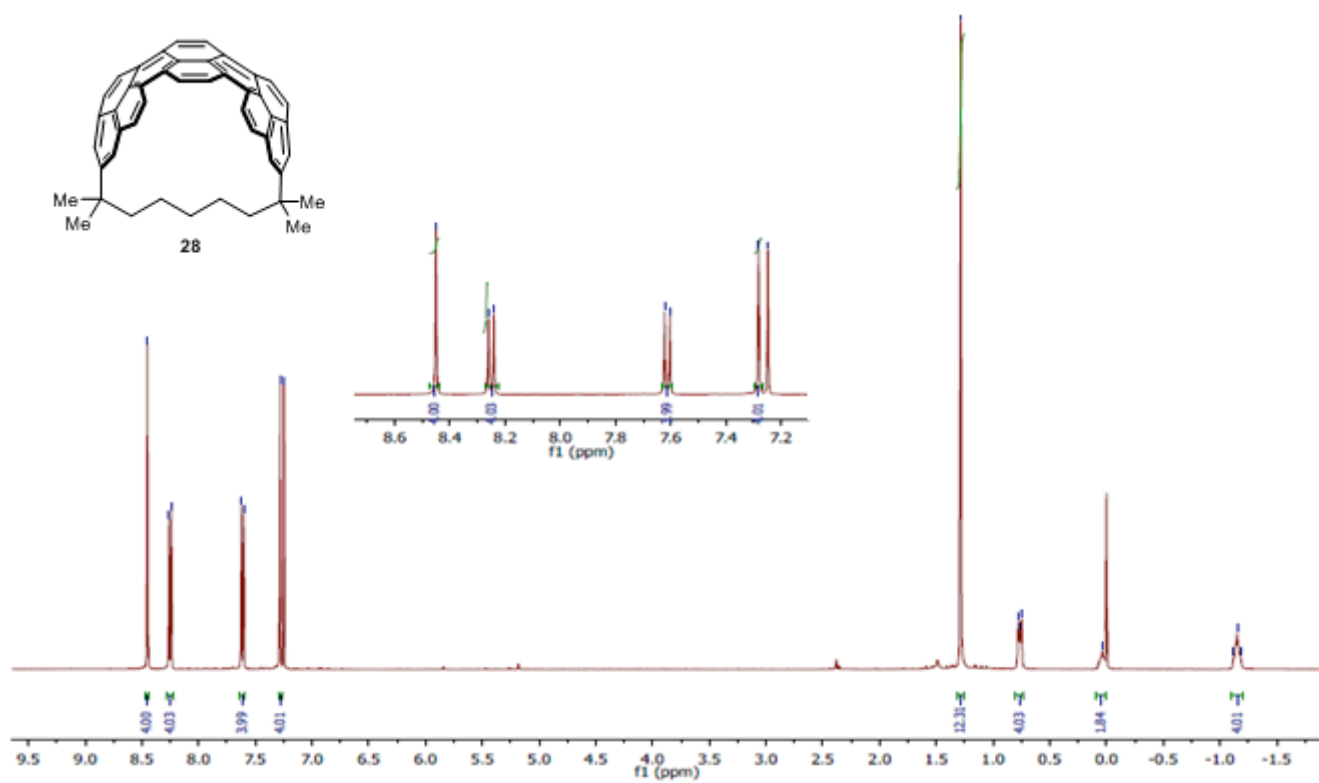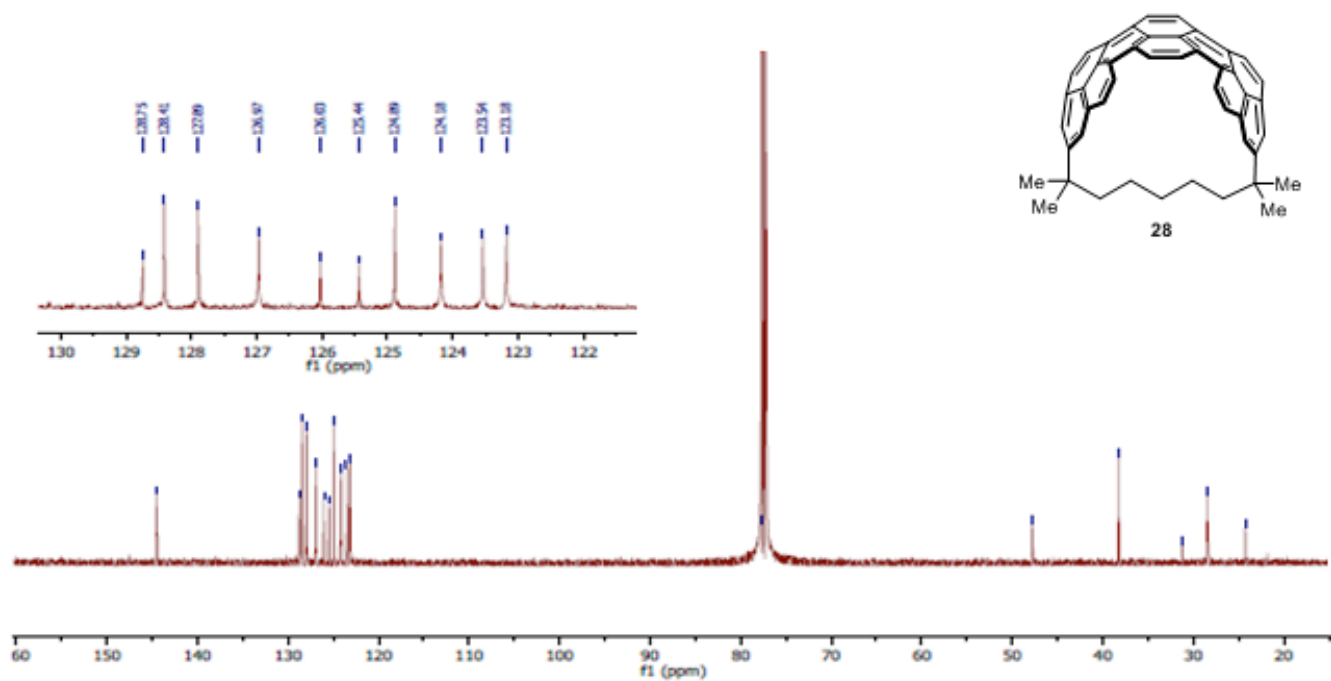

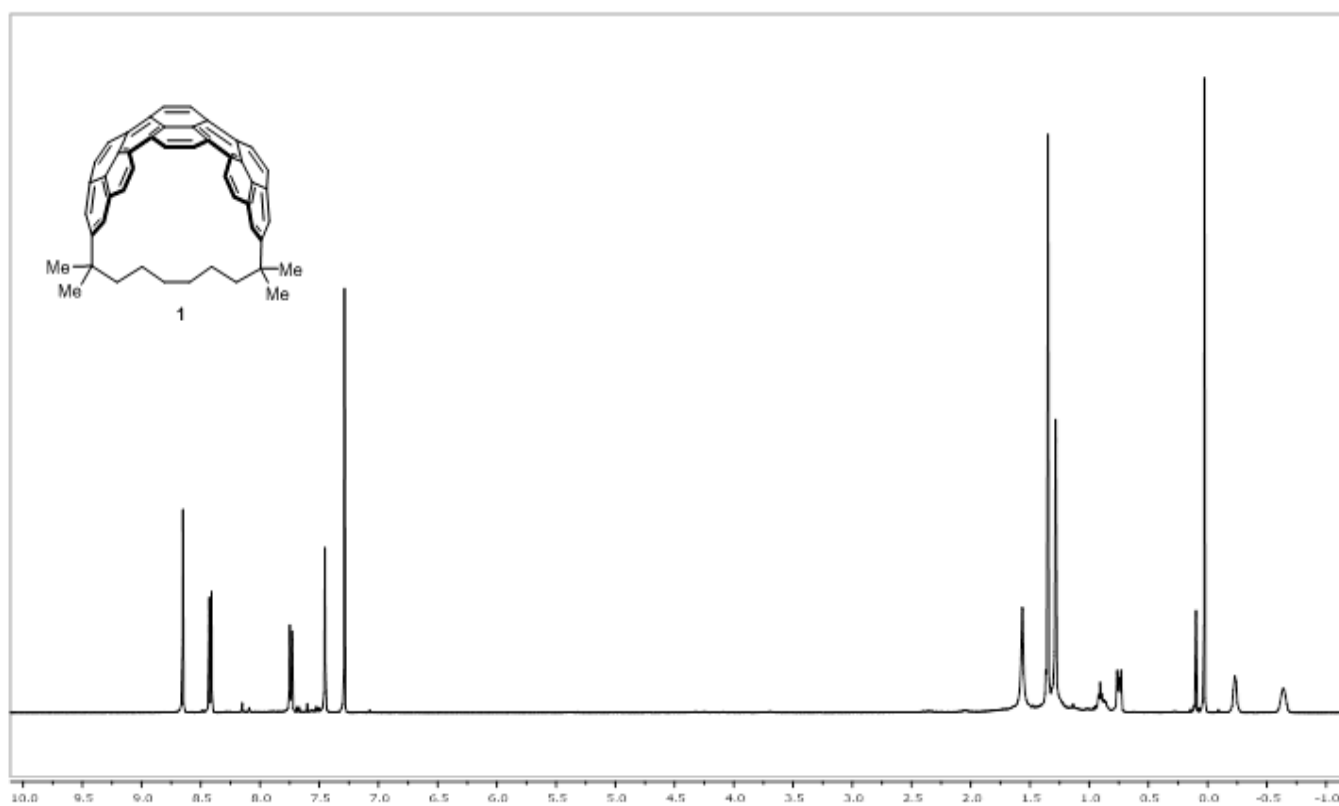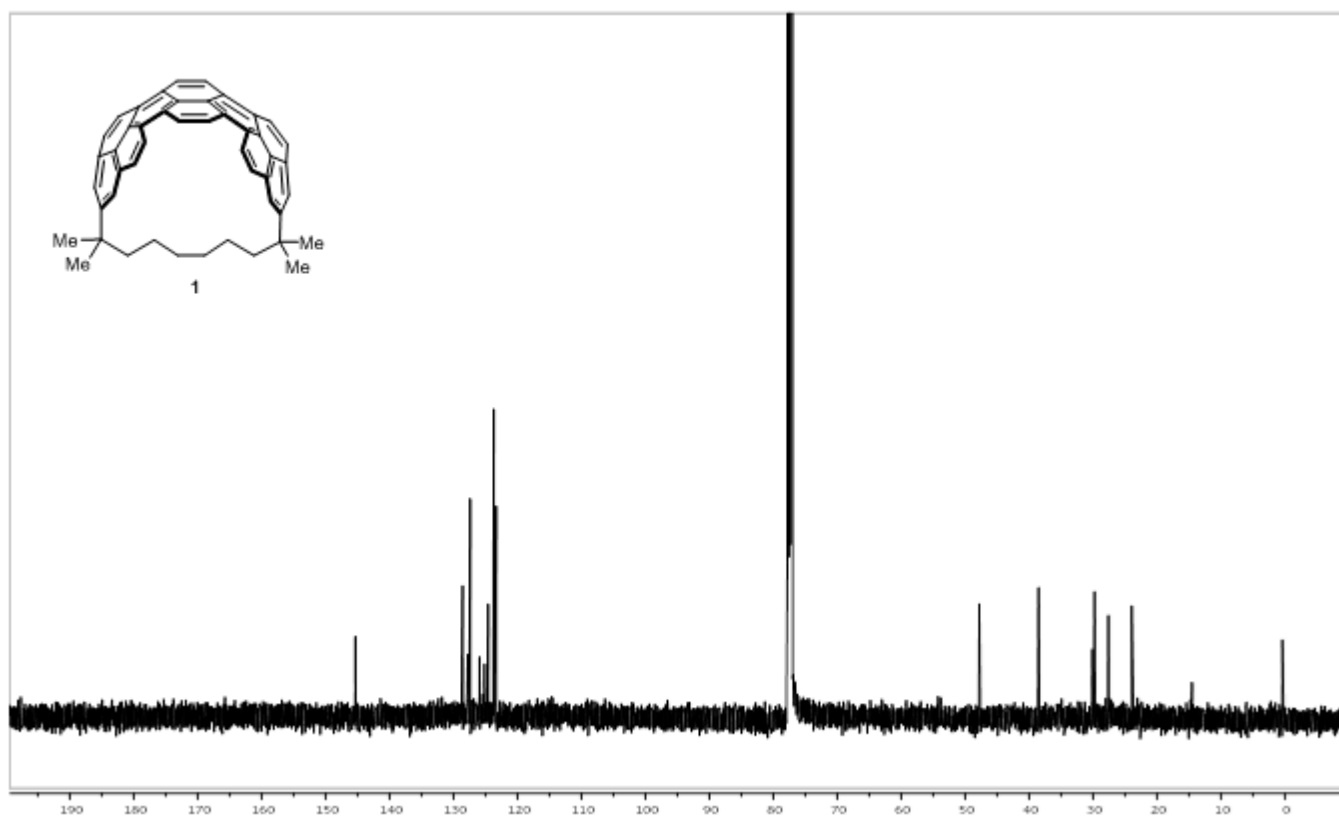



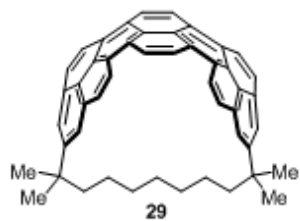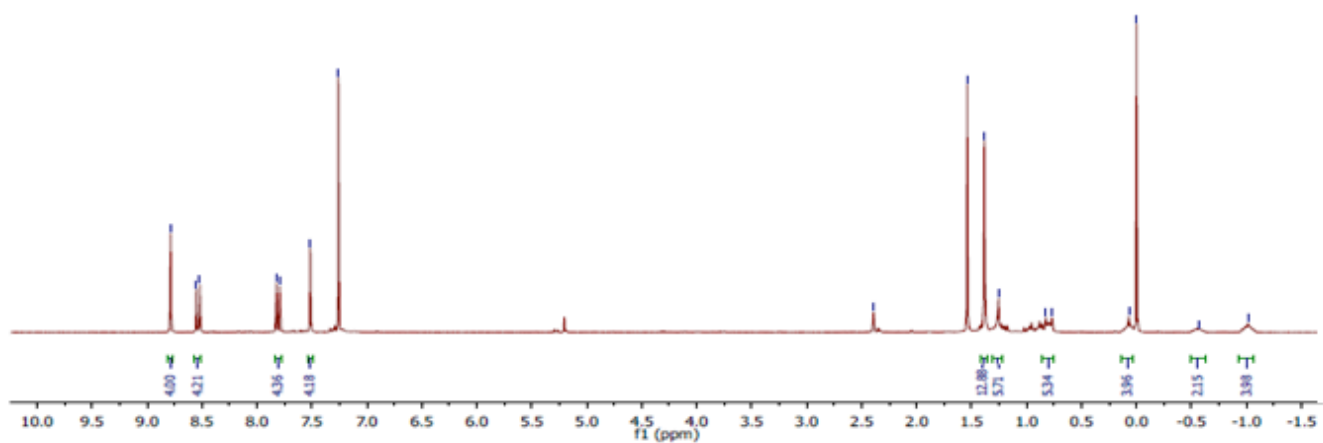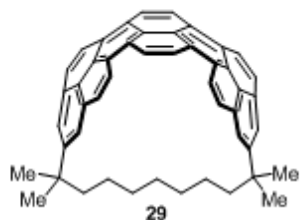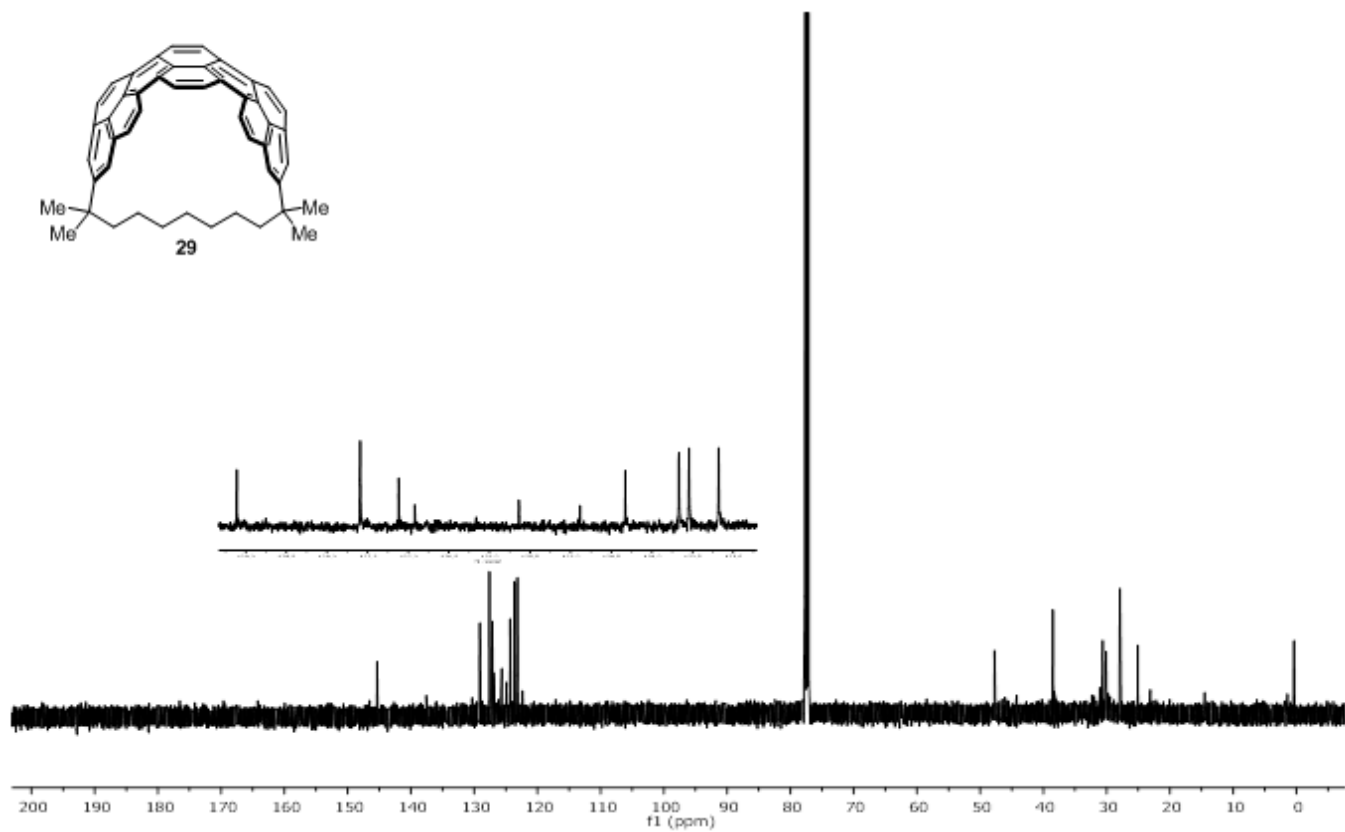

### III. Additional Views of 29 in the Crystal and Structural Analysis of the Teropyrene System

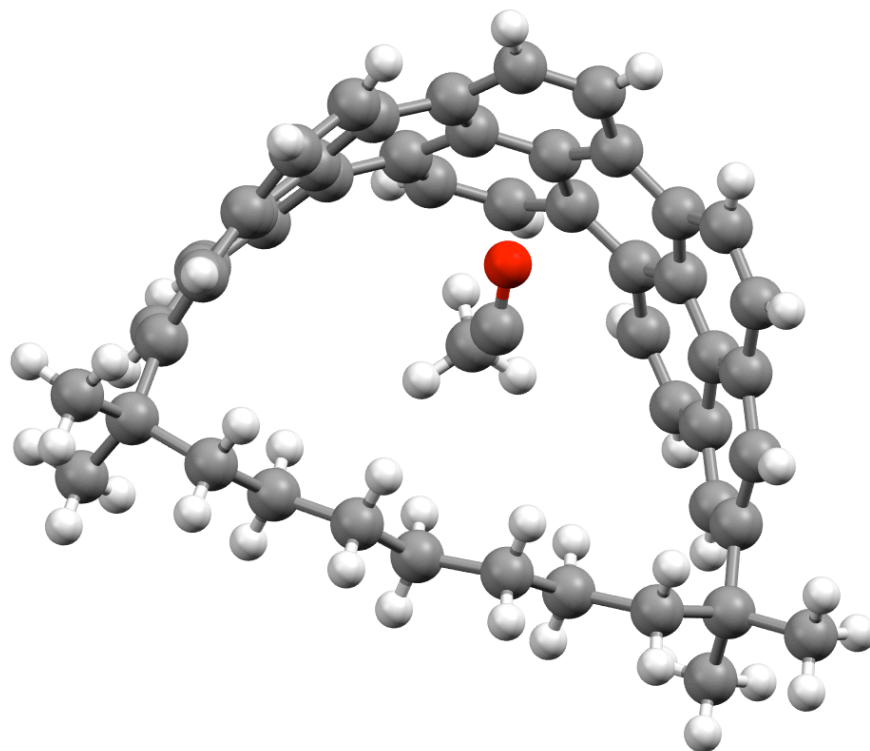

**Figure SI 1:** Ball-and-stick model of **29**, with minor disorder components of the ethanol molecule omitted for clarity

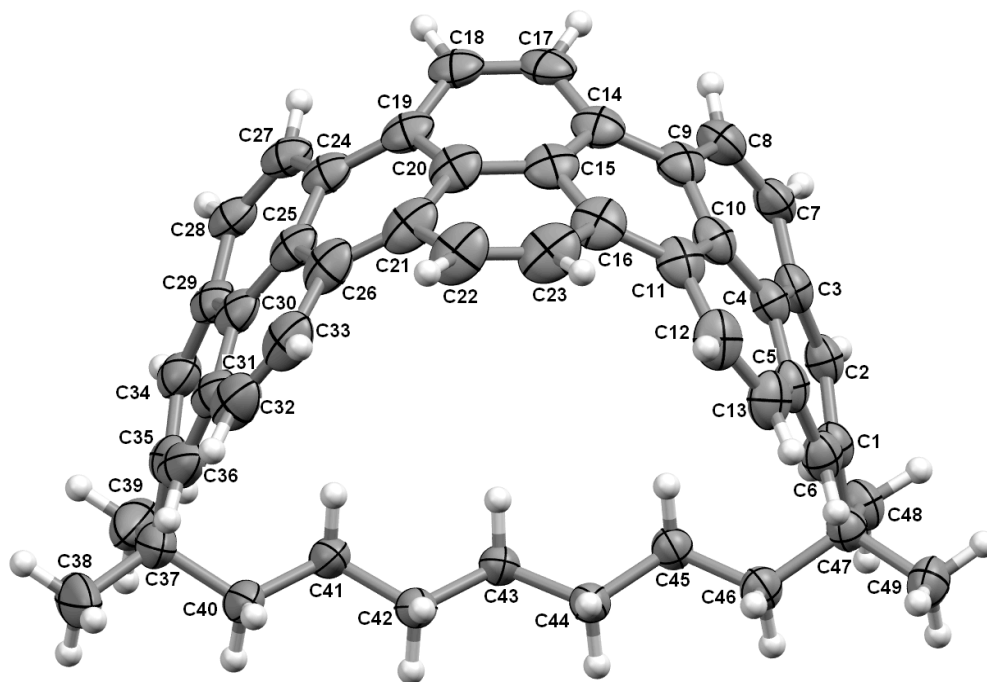

**Figure SI 2:** 50% probability displacement ellipsoids, with crystallographic numbering scheme. Ethanol molecule omitted for clarity.

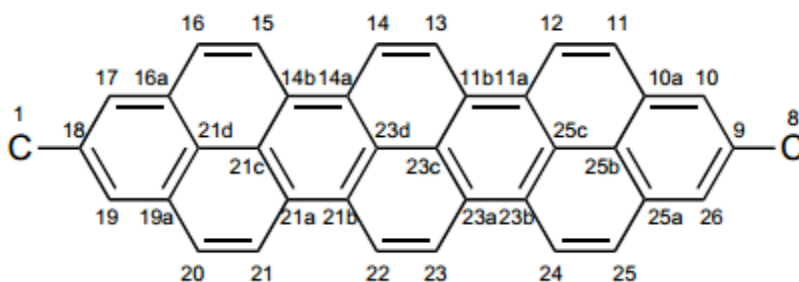

**Scheme SI 1:** Technical numbering scheme as reported in: Merner, B. L.; Dawe, L. N.; Bodwell, G. J. *Angew. Chem. Int. Ed.* **2009**, *48*, 5847-5891.

**Table 1:** Plane Definitions (Technical Numbering)

| <u>Plane</u> | <u>Atoms</u>              |
|--------------|---------------------------|
| 1            | C9-C10-C26                |
| 2            | C10-C10a-C25a-C26         |
| 3            | C10a-C25b-C25a            |
| 4            | C11-C12-C25b-C25c-C24-C25 |
| 5            | C11a-C25c-C23b            |
| 6            | C11a-C11b-C23a-C23b       |
| 7            | C11b-C23c-C23a            |
| 8            | C12-C14-C23c-C23d-C22-C23 |
| 9            | C14a-C23d-C21b            |
| 10           | C14a-C14b-C21a-21b        |
| 11           | C14b-C21c-C21a            |
| 12           | C15-C16-C21c-C21d-C20-C21 |
| 13           | C16a-C21d-C19a            |
| 14           | C17-C16a-C19-C19a         |
| 15           | C17-C18-C19               |

**Table 2:** Angle Calculations (Technical Numbering Scheme; °)

|                     |          |
|---------------------|----------|
| C1 – 1( $\beta_1$ ) | 5.9(6)   |
| 1 – 2               | 6.41(13) |

|                                           |           |
|-------------------------------------------|-----------|
| 2 – 3                                     | 7.67(13)  |
| 3 – 4                                     | 8.56(12)  |
| 4 – 5                                     | 9.63(12)  |
| 5 – 6                                     | 15.02(14) |
| 6 – 7                                     | 16.54(14) |
| 7 – 8                                     | 14.29(13) |
| 8 – 9                                     | 14.11(13) |
| 9 – 10                                    | 16.66(15) |
| 10 – 11                                   | 13.60(15) |
| 11 – 12                                   | 8.76(14)  |
| 12 – 13                                   | 7.93(14)  |
| 13 – 14                                   | 7.40(15)  |
| 14 – 15                                   | 7.73(15)  |
| C1 – 1 ( $\beta_2$ )                      | 5.9(5)    |
| 1 – 7 ( $\theta_1$ )                      | 63.82     |
| 5 – 11 ( $\theta_2$ )                     | 90.23     |
| 9 – 15 ( $\theta_3$ )                     | 62.06     |
| 1 – 15 ( $\theta_{\text{tot}}$ )          | 154.3     |
| $\theta_{\text{tot}} + \beta_1 + \beta_2$ | 166.1     |

**Table 3:** Numbering Scheme Conversion

| <u>Technical</u> |   | <u>Crystallographic</u> |  | <u>Technical</u> | <u>Crystallographic</u> |     |
|------------------|---|-------------------------|--|------------------|-------------------------|-----|
| C1               | = | C47                     |  | C10a             | =                       | C3  |
| C8               | = | C37                     |  | C11a             | =                       | C9  |
| C9               | = | C1                      |  | C11b             | =                       | C14 |
| C10              | = | C2                      |  | C14a             | =                       | C19 |
| C11              | = | C7                      |  | C14b             | =                       | C24 |
| C12              | = | C8                      |  | C16a             | =                       | C29 |
| C13              | = | C17                     |  | C19a             | =                       | C31 |
| C14              | = | C18                     |  | C21a             | =                       | C26 |
| C15              | = | C27                     |  | C21b             | =                       | C21 |
| C16              | = | C28                     |  | C23a             | =                       | C16 |
| C17              | = | C34                     |  | C23b             | =                       | C11 |
| C18              | = | C35                     |  | C25a             | =                       | C5  |
| C19              | = | C36                     |  | C25b             | =                       | C4  |
| C20              | = | C32                     |  | C25c             | =                       | C10 |
| C21              | = | C33                     |  | C23c             | =                       | C15 |
| C22              | = | C22                     |  | C23d             | =                       | C20 |
| C23              | = | C23                     |  | C21c             | =                       | C25 |
| C24              | = | C12                     |  | C21d             | =                       | C30 |
| C25              | = | C13                     |  |                  |                         |     |
| C26              | = | C6                      |  |                  |                         |     |

## Supplemental: Full Calculations

----- Plane number 1 -----

| Atoms Defining Plane | Distance | esd    |
|----------------------|----------|--------|
| C1 [ 1; 0; 0; 0]     | 0.0000   | 0.0000 |
| C2 [ 1; 0; 0; 0]     | 0.0000   | 0.0000 |
| C6 [ 1; 0; 0; 0]     | 0.0000   | 0.0000 |

Least-squares plane  
 $28.55940x + 8.17465y + 3.09176z = 12.99718$   
(0.00000) (0.00000) (0.00000) (0.00000)

Mean deviation from plane is 0.0000 angstrom  
Weight scheme: Sigma Weights  
Chi-squared: 0.000

----- Plane number 2 -----

| Atoms Defining Plane | Distance | esd    |
|----------------------|----------|--------|
| C2 [ 1; 0; 0; 0]     | -0.0030  | 0.0042 |
| C3 [ 1; 0; 0; 0]     | 0.0030   | 0.0042 |
| C5 [ 1; 0; 0; 0]     | -0.0027  | 0.0040 |
| C6 [ 1; 0; 0; 0]     | 0.0030   | 0.0042 |

Least-squares plane  
 $30.22967x + 7.08813y + 2.00030z = 11.73439$   
(0.03207) (0.02824) (0.02544) (0.02602)

Mean deviation from plane is 0.0029 angstrom  
Weight scheme: Sigma Weights  
Chi-squared: 3.464

----- Plane number 3 -----

| Atoms Defining Plane | Distance | esd    |
|----------------------|----------|--------|
| C3 [ 1; 0; 0; 0]     | 0.0000   | 0.0000 |
| C4 [ 1; 0; 0; 0]     | 0.0000   | 0.0000 |
| C5 [ 1; 0; 0; 0]     | 0.0000   | 0.0000 |

Least-squares plane  
 $31.73673x + 5.65939y + 0.67450z = 10.22225$   
(0.00000) (0.00000) (0.00000) (0.00000)

Mean deviation from plane is 0.0000 angstrom  
Weight scheme: Sigma Weights

Chi-squared: 0.000

----- Plane number 4 -----

| Atoms Defining Plane | Distance | esd    |
|----------------------|----------|--------|
| C7 [ 1; 0; 0; 0]     | 0.0242   | 0.0042 |
| C8 [ 1; 0; 0; 0]     | 0.0108   | 0.0046 |
| C4 [ 1; 0; 0; 0]     | -0.0259  | 0.0036 |
| C10 [ 1; 0; 0; 0]    | -0.0341  | 0.0040 |
| C12 [ 1; 0; 0; 0]    | 0.0318   | 0.0046 |
| C13 [ 1; 0; 0; 0]    | 0.0074   | 0.0044 |

Least-squares plane

$32.77021x + 3.90644y - 0.77925z = 8.47208$   
(0.01040) (0.02599) (0.02140) (0.02484)

Mean deviation from plane is 0.0224 angstrom

Weight scheme: Sigma Weights

Chi-squared: 301.893

----- Plane number 5 -----

| Atoms Defining Plane | Distance | esd    |
|----------------------|----------|--------|
| C9 [ 1; 0; 0; 0]     | 0.0000   | 0.0000 |
| C10 [ 1; 0; 0; 0]    | -0.0000  | 0.0000 |
| C11 [ 1; 0; 0; 0]    | 0.0000   | 0.0000 |

Least-squares plane

$33.15106x + 1.68404y - 2.24002z = 6.52990$   
(0.00000) (0.00000) (0.00000) (0.00000)

Mean deviation from plane is 0.0000 angstrom

Weight scheme: Sigma Weights

Chi-squared: 0.000

----- Plane number 6 -----

| Atoms Defining Plane | Distance | esd    |
|----------------------|----------|--------|
| C9 [ 1; 0; 0; 0]     | 0.0084   | 0.0045 |
| C14 [ 1; 0; 0; 0]    | -0.0084  | 0.0045 |
| C11 [ 1; 0; 0; 0]    | -0.0092  | 0.0047 |
| C16 [ 1; 0; 0; 0]    | 0.0101   | 0.0049 |

Least-squares plane

$31.77448x - 1.67152y - 4.56739z = 3.29527$   
(0.02572) (0.03453) (0.02635) (0.03173)

Mean deviation from plane is 0.0091 angstrom  
Weight scheme: Sigma Weights  
Chi-squared: 27.066

----- Plane number 7 -----

| Atoms Defining Plane | Distance | esd    |
|----------------------|----------|--------|
| C14 [ 1; 0; 0; 0]    | 0.0000   | 0.0000 |
| C15 [ 1; 0; 0; 0]    | 0.0000   | 0.0000 |
| C16 [ 1; 0; 0; 0]    | -0.0000  | 0.0000 |

Least-squares plane  
 $-27.75476x + 5.22979y + 6.76036z = 0.11877$   
(0.00000) (0.00000) (0.00000) (0.00000)

Mean deviation from plane is 0.0000 angstrom  
Weight scheme: Sigma Weights  
Chi-squared: 0.000

----- Plane number 8 -----

| Atoms Defining Plane | Distance | esd    |
|----------------------|----------|--------|
| C17 [ 1; 0; 0; 0]    | -0.0479  | 0.0045 |
| C18 [ 1; 0; 0; 0]    | -0.0296  | 0.0047 |
| C15 [ 1; 0; 0; 0]    | 0.0729   | 0.0040 |
| C20 [ 1; 0; 0; 0]    | 0.0772   | 0.0044 |
| C22 [ 1; 0; 0; 0]    | -0.0659  | 0.0054 |
| C23 [ 1; 0; 0; 0]    | -0.0498  | 0.0054 |

Least-squares plane  
 $-22.45085x + 8.02227y + 8.15167z = 2.79361$   
(0.05600) (0.02408) (0.01443) (0.02386)

Mean deviation from plane is 0.0572 angstrom  
Weight scheme: Sigma Weights  
Chi-squared: 1418.333

----- Plane number 9 -----

| Atoms Defining Plane | Distance | esd    |
|----------------------|----------|--------|
| C19 [ 1; 0; 0; 0]    | 0.0000   | 0.0000 |
| C20 [ 1; 0; 0; 0]    | 0.0000   | 0.0000 |
| C21 [ 1; 0; 0; 0]    | 0.0000   | 0.0000 |

Least-squares plane  
 $-15.80703x + 10.22449y + 9.09896z = 5.09995$   
(0.00000) (0.00000) (0.00000) (0.00000)



Mean deviation from plane is 0.0000 angstrom  
Weight scheme: Sigma Weights  
Chi-squared: 0.000

----- Plane number 10 -----

| Atoms Defining Plane | Distance | esd    |
|----------------------|----------|--------|
| C19 [ 1; 0; 0; 0]    | -0.0055  | 0.0045 |
| C24 [ 1; 0; 0; 0]    | 0.0055   | 0.0045 |
| C21 [ 1; 0; 0; 0]    | 0.0079   | 0.0053 |
| C26 [ 1; 0; 0; 0]    | -0.0079  | 0.0053 |

Least-squares plane  
 $-6.75073x + 11.97990y + 9.54800z = 7.13790$   
(0.08576) (0.01998) (0.01598) (0.01618)

Mean deviation from plane is 0.0067 angstrom  
Weight scheme: Sigma Weights  
Chi-squared: 13.386

----- Plane number 11 -----

| Atoms Defining Plane | Distance | esd    |
|----------------------|----------|--------|
| C24 [ 1; 0; 0; 0]    | 0.0000   | 0.0000 |
| C25 [ 1; 0; 0; 0]    | 0.0000   | 0.0000 |
| C26 [ 1; 0; 0; 0]    | 0.0000   | 0.0000 |

Least-squares plane  
 $1.09735x + 12.68032y + 9.31169z = 8.03029$   
(0.00000) (0.00000) (0.00000) (0.00000)

Mean deviation from plane is 0.0000 angstrom  
Weight scheme: Sigma Weights  
Chi-squared: 0.000

----- Plane number 12 -----

| Atoms Defining Plane | Distance | esd    |
|----------------------|----------|--------|
| C27 [ 1; 0; 0; 0]    | -0.0138  | 0.0047 |
| C28 [ 1; 0; 0; 0]    | -0.0234  | 0.0047 |
| C25 [ 1; 0; 0; 0]    | 0.0365   | 0.0044 |
| C30 [ 1; 0; 0; 0]    | 0.0375   | 0.0044 |
| C32 [ 1; 0; 0; 0]    | -0.0205  | 0.0058 |
| C33 [ 1; 0; 0; 0]    | -0.0391  | 0.0058 |

Least-squares plane  
 $6.17427x + 12.70036y + 8.93382z = 8.24917$

(0.07781) (0.00967) (0.01199) (0.00469)

Mean deviation from plane is 0.0284 angstrom

Weight scheme: Sigma Weights

Chi-squared: 325.843

----- Plane number 13 -----

| Atoms Defining Plane | Distance | esd    |
|----------------------|----------|--------|
| C29 [ 1; 0; 0; 0]    | 0.0000   | 0.0000 |
| C30 [ 1; 0; 0; 0]    | 0.0000   | 0.0000 |
| C31 [ 1; 0; 0; 0]    | 0.0000   | 0.0000 |

Least-squares plane

$10.66253x + 12.41993y + 8.45352z = 8.17402$

(0.00000) (0.00000) (0.00000) (0.00000)

Mean deviation from plane is 0.0000 angstrom

Weight scheme: Sigma Weights

Chi-squared: 0.000

----- Plane number 14 -----

| Atoms Defining Plane | Distance | esd    |
|----------------------|----------|--------|
| C29 [ 1; 0; 0; 0]    | 0.0019   | 0.0045 |
| C34 [ 1; 0; 0; 0]    | -0.0020  | 0.0045 |
| C31 [ 1; 0; 0; 0]    | -0.0027  | 0.0053 |
| C36 [ 1; 0; 0; 0]    | 0.0033   | 0.0057 |

Least-squares plane

$14.65462x + 11.97889y + 7.82605z = 7.82096$

(0.08127) (0.02108) (0.02191) (0.01314)

Mean deviation from plane is 0.0025 angstrom

Weight scheme: Sigma Weights

Chi-squared: 1.769

----- Plane number 15 -----

| Atoms Defining Plane | Distance | esd    |
|----------------------|----------|--------|
| C34 [ 1; 0; 0; 0]    | 0.0000   | 0.0000 |
| C35 [ 1; 0; 0; 0]    | 0.0000   | 0.0000 |
| C36 [ 1; 0; 0; 0]    | 0.0000   | 0.0000 |

Least-squares plane

$18.56536x + 11.30235y + 7.03444z = 7.12821$

(0.00000) (0.00000) (0.00000) (0.00000)

Mean deviation from plane is 0.0000 angstrom  
Weight scheme: Sigma Weights  
Chi-squared: 0.000

Dihedral angles between least-squares planes  
-----

| plane | plane | angle   | esd   |
|-------|-------|---------|-------|
| 1     | 2     | 6.419   | 0.131 |
| 1     | 3     | 14.098  | 0.000 |
| 1     | 4     | 22.658  | 0.118 |
| 1     | 5     | 32.252  | 0.000 |
| 1     | 6     | 47.276  | 0.143 |
| 1     | 7     | 116.177 | 0.000 |
| 1     | 8     | 101.891 | 0.130 |
| 1     | 9     | 87.778  | 0.000 |
| 1     | 10    | 71.124  | 0.150 |
| 1     | 11    | 57.522  | 0.000 |
| 1     | 12    | 48.771  | 0.136 |
| 1     | 13    | 40.873  | 0.000 |
| 1     | 14    | 33.499  | 0.153 |
| 1     | 15    | 25.806  | 0.000 |
| 2     | 3     | 7.679   | 0.131 |
| 2     | 4     | 16.241  | 0.176 |
| 2     | 5     | 25.842  | 0.131 |
| 2     | 6     | 40.866  | 0.193 |
| 2     | 7     | 122.586 | 0.131 |
| 2     | 8     | 108.298 | 0.184 |
| 2     | 9     | 94.186  | 0.131 |
| 2     | 10    | 77.533  | 0.199 |
| 2     | 11    | 63.933  | 0.131 |
| 2     | 12    | 55.184  | 0.188 |
| 2     | 13    | 47.290  | 0.131 |
| 2     | 14    | 39.917  | 0.201 |
| 2     | 15    | 32.224  | 0.130 |
| 3     | 4     | 8.563   | 0.118 |
| 3     | 5     | 18.177  | 0.000 |
| 3     | 6     | 33.197  | 0.143 |
| 3     | 7     | 130.256 | 0.000 |
| 3     | 8     | 115.967 | 0.130 |
| 3     | 9     | 101.856 | 0.000 |
| 3     | 10    | 85.205  | 0.150 |
| 3     | 11    | 71.607  | 0.000 |
| 3     | 12    | 62.861  | 0.136 |
| 3     | 13    | 54.969  | 0.000 |
| 3     | 14    | 47.596  | 0.153 |
| 3     | 15    | 39.901  | 0.000 |

|   |    |         |       |
|---|----|---------|-------|
| 4 | 5  | 9.630   | 0.117 |
| 4 | 6  | 24.641  | 0.185 |
| 4 | 7  | 138.815 | 0.118 |
| 4 | 8  | 124.525 | 0.175 |
| 4 | 9  | 110.415 | 0.118 |
| 4 | 10 | 93.767  | 0.190 |
| 4 | 11 | 80.169  | 0.118 |
| 4 | 12 | 71.423  | 0.180 |
| 4 | 13 | 63.531  | 0.118 |
| 4 | 14 | 56.157  | 0.193 |
| 4 | 15 | 48.457  | 0.118 |
| 5 | 6  | 15.024  | 0.143 |
| 5 | 7  | 148.429 | 0.000 |
| 5 | 8  | 134.141 | 0.130 |
| 5 | 9  | 120.028 | 0.000 |
| 5 | 10 | 103.375 | 0.150 |
| 5 | 11 | 89.774  | 0.000 |
| 5 | 12 | 81.022  | 0.136 |
| 5 | 13 | 73.119  | 0.000 |
| 5 | 14 | 65.736  | 0.154 |
| 5 | 15 | 58.024  | 0.000 |
| 6 | 7  | 163.453 | 0.143 |
| 6 | 8  | 149.164 | 0.193 |
| 6 | 9  | 135.052 | 0.143 |
| 6 | 10 | 118.399 | 0.207 |
| 6 | 11 | 104.798 | 0.143 |
| 6 | 12 | 96.045  | 0.197 |
| 6 | 13 | 88.139  | 0.143 |
| 6 | 14 | 80.753  | 0.210 |
| 6 | 15 | 73.037  | 0.143 |
| 7 | 8  | 14.290  | 0.130 |
| 7 | 9  | 28.401  | 0.000 |
| 7 | 10 | 45.053  | 0.150 |
| 7 | 11 | 58.655  | 0.000 |
| 7 | 12 | 67.409  | 0.136 |
| 7 | 13 | 75.318  | 0.000 |
| 7 | 14 | 82.707  | 0.154 |
| 7 | 15 | 90.426  | 0.000 |
| 8 | 9  | 14.113  | 0.130 |
| 8 | 10 | 30.769  | 0.198 |
| 8 | 11 | 44.371  | 0.130 |
| 8 | 12 | 53.129  | 0.188 |
| 8 | 13 | 61.044  | 0.130 |
| 8 | 14 | 68.436  | 0.201 |
| 8 | 15 | 76.160  | 0.130 |
| 9 | 10 | 16.657  | 0.150 |
| 9 | 11 | 30.259  | 0.000 |
| 9 | 12 | 39.018  | 0.136 |
| 9 | 13 | 46.936  | 0.000 |
| 9 | 14 | 54.330  | 0.154 |

|    |    |        |       |
|----|----|--------|-------|
| 9  | 15 | 62.055 | 0.000 |
| 10 | 11 | 13.603 | 0.150 |
| 10 | 12 | 22.362 | 0.202 |
| 10 | 13 | 30.282 | 0.150 |
| 10 | 14 | 37.677 | 0.215 |
| 10 | 15 | 45.404 | 0.150 |
| 11 | 12 | 8.763  | 0.136 |
| 11 | 13 | 16.688 | 0.000 |
| 11 | 14 | 24.083 | 0.154 |
| 11 | 15 | 31.810 | 0.000 |
| 12 | 13 | 7.927  | 0.136 |
| 12 | 14 | 15.322 | 0.205 |
| 12 | 15 | 23.048 | 0.136 |
| 13 | 14 | 7.395  | 0.154 |
| 13 | 15 | 15.122 | 0.000 |
| 14 | 15 | 7.727  | 0.154 |

#### IV. DFT Calculations and Cartesian Co-ordinates for 1,1,*n,n*-Tetramethyl[*n*](2,11)teropyrenophanes (*n* = 6-9)

All calculations were performed using the Gaussian 09 package. The structures for all compounds were constructed by modifying the existing crystal structure of **N9**. All three structures were optimized using density functional theory, with the B3LYP exchange-correlation functional and the cc-pVTZ basis set.

Becke, A. D. *J. Chem. Phys.*, 1993, **98**, 5648

Kendall, R. A., Dunning, T. H. Harrison, R. J. *J. Chem. Phys.* 1992, **96**, 6796

##### 1,1,6,6-Tetramethyl[6](2,11)teropyrenophane (E = -1775.1837652 Hartree):

|   |           |           |           |
|---|-----------|-----------|-----------|
| C | 3.604348  | 2.181072  | -0.032186 |
| C | 3.709889  | 1.443523  | 1.152644  |
| H | 3.746586  | 1.953282  | 2.105840  |
| C | 3.648760  | 0.050180  | 1.167636  |
| C | 3.466896  | -0.644614 | -0.055860 |
| C | 3.590397  | 0.074207  | -1.270397 |
| C | 3.655046  | 1.473498  | -1.233234 |
| H | 3.653571  | 2.000177  | -2.176682 |
| C | 3.588672  | -0.710161 | 2.383559  |
| H | 3.884834  | -0.237479 | 3.311532  |
| C | 3.066825  | -1.960260 | 2.389914  |
| H | 2.939832  | -2.476977 | 3.330321  |
| C | 2.541246  | -2.545600 | 1.186522  |
| C | 2.918746  | -1.959965 | -0.053822 |
| C | 2.482482  | -2.525493 | -1.283726 |
| C | 2.943238  | -1.913771 | -2.499338 |
| H | 2.763902  | -2.408578 | -3.443009 |
| C | 3.464316  | -0.661685 | -2.494759 |
| H | 3.707570  | -0.170023 | -3.428283 |
| C | 1.418104  | -3.402804 | 1.202585  |
| C | 0.717892  | -3.609665 | -0.014842 |
| C | 1.365364  | -3.392669 | -1.259003 |
| C | 0.725912  | -3.748935 | 2.416785  |
| H | 1.280173  | -3.895684 | 3.332905  |
| C | -0.626930 | -3.741208 | 2.444523  |
| H | -1.145184 | -3.882004 | 3.382510  |
| C | -1.365523 | -3.392606 | 1.259003  |
| C | -0.718061 | -3.609633 | 0.014841  |
| C | -1.418264 | -3.402739 | -1.202585 |
| C | -0.726088 | -3.748905 | -2.416784 |
| H | -1.280355 | -3.895632 | -3.332904 |
| C | 0.626755  | -3.741236 | -2.444523 |
| H | 1.145002  | -3.882058 | -3.382510 |
| C | -2.482601 | -2.525379 | 1.283725  |
| C | -2.918838 | -1.959830 | 0.053822  |
| C | -2.541365 | -2.545483 | -1.186522 |
| C | -2.943328 | -1.913635 | 2.499338  |

|   |           |           |           |
|---|-----------|-----------|-----------|
| H | -2.764016 | -2.408452 | 3.443008  |
| C | -3.464347 | -0.661526 | 2.494759  |
| H | -3.707579 | -0.169852 | 3.428283  |
| C | -3.590392 | 0.074373  | 1.270396  |
| C | -3.466927 | -0.644455 | 0.055860  |
| C | -3.648759 | 0.050348  | -1.167636 |
| C | -3.588708 | -0.709997 | -2.383559 |
| H | -3.884850 | -0.237302 | -3.311531 |
| C | -3.066919 | -1.960120 | -2.389914 |
| H | -2.939951 | -2.476843 | -3.330321 |
| C | -3.654971 | 1.473666  | 1.233233  |
| H | -3.653470 | 2.000346  | 2.176681  |
| C | -3.604240 | 2.181239  | 0.032185  |
| C | -3.709820 | 1.443694  | -1.152645 |
| H | -3.746493 | 1.953453  | -2.105841 |
| C | -3.322174 | 3.692569  | -0.033263 |
| C | -4.298194 | 4.373375  | -1.016301 |
| H | -4.159900 | 4.030826  | -2.041183 |
| H | -4.142660 | 5.453400  | -1.011874 |
| H | -5.333904 | 4.179268  | -0.734157 |
| C | -3.489448 | 4.381453  | 1.329152  |
| H | -4.512044 | 4.281841  | 1.696867  |
| H | -3.275360 | 5.446964  | 1.231304  |
| H | -2.818491 | 3.983505  | 2.088156  |
| C | -1.866464 | 3.918184  | -0.576090 |
| H | -1.753903 | 3.322633  | -1.485261 |
| H | -1.796337 | 4.964564  | -0.890735 |
| C | -0.682181 | 3.628672  | 0.363347  |
| H | -0.817926 | 2.666581  | 0.863786  |
| H | -0.661432 | 4.383850  | 1.153568  |
| C | 0.682354  | 3.628668  | -0.363376 |
| H | 0.818070  | 2.666597  | -0.863864 |
| H | 0.661635  | 4.383886  | -1.153559 |
| C | 1.866643  | 3.918090  | 0.576081  |
| H | 1.754044  | 3.322517  | 1.485233  |
| H | 1.796568  | 4.964464  | 0.890758  |
| C | 3.322348  | 3.692415  | 0.033265  |
| C | 4.298383  | 4.373172  | 1.016321  |
| H | 4.160058  | 4.030622  | 2.041199  |
| H | 4.142892  | 5.453204  | 1.011900  |
| H | 5.334089  | 4.179024  | 0.734191  |
| C | 3.489665  | 4.381306  | -1.329140 |
| H | 4.512263  | 4.281660  | -1.696842 |
| H | 3.275614  | 5.446824  | -1.231283 |
| H | 2.818704  | 3.983395  | -2.088160 |

**1,1,7,7-Tetramethyl[7](2,11)teropyrenophane (28) (E = -1893.2121894 Hartree):**

|   |           |           |           |
|---|-----------|-----------|-----------|
| C | -4.092265 | 2.015914  | 0.047603  |
| C | -4.087157 | 1.306394  | -1.158285 |
| H | -4.146630 | 1.837090  | -2.099309 |
| C | -3.884788 | -0.073599 | -1.204291 |
| C | -3.672307 | -0.780134 | 0.007873  |
| C | -3.902262 | -0.110525 | 1.234516  |
| C | -4.107597 | 1.274916  | 1.228459  |
| H | -4.185499 | 1.773016  | 2.183856  |
| C | -3.717087 | -0.792137 | -2.434558 |
| H | -4.021444 | -0.321164 | -3.360741 |
| C | -3.092282 | -1.994436 | -2.453161 |
| H | -2.894079 | -2.472176 | -3.401689 |
| C | -2.561119 | -2.571111 | -1.248799 |
| C | -3.010649 | -2.042084 | -0.006963 |
| C | -2.567253 | -2.602636 | 1.222584  |
| C | -3.107128 | -2.059547 | 2.436957  |
| H | -2.910869 | -2.559038 | 3.374639  |
| C | -3.740423 | -0.860174 | 2.445007  |
| H | -4.052282 | -0.415256 | 3.381537  |
| C | -1.397365 | -3.372783 | -1.252557 |
| C | -0.717332 | -3.576144 | -0.022333 |
| C | -1.398508 | -3.401062 | 1.210409  |
| C | -0.676779 | -3.690162 | -2.455544 |
| H | -1.210868 | -3.820233 | -3.385931 |
| C | 0.676779  | -3.690162 | -2.455544 |
| H | 1.210868  | -3.820233 | -3.385931 |
| C | 1.397365  | -3.372783 | -1.252557 |
| C | 0.717332  | -3.576144 | -0.022333 |
| C | 1.398508  | -3.401062 | 1.210409  |
| C | 0.677202  | -3.738874 | 2.406284  |
| H | 1.210100  | -3.882528 | 3.335325  |
| C | -0.677202 | -3.738874 | 2.406284  |
| H | -1.210100 | -3.882528 | 3.335325  |
| C | 2.561119  | -2.571111 | -1.248799 |
| C | 3.010649  | -2.042084 | -0.006963 |
| C | 2.567253  | -2.602636 | 1.222584  |
| C | 3.092282  | -1.994436 | -2.453161 |
| H | 2.894079  | -2.472176 | -3.401689 |
| C | 3.717087  | -0.792137 | -2.434558 |
| H | 4.021443  | -0.321163 | -3.360741 |
| C | 3.884788  | -0.073599 | -1.204291 |
| C | 3.672307  | -0.780134 | 0.007873  |
| C | 3.902262  | -0.110525 | 1.234516  |
| C | 3.740423  | -0.860174 | 2.445007  |
| H | 4.052282  | -0.415256 | 3.381537  |
| C | 3.107128  | -2.059547 | 2.436957  |
| H | 2.910870  | -2.559038 | 3.374638  |



|   |           |          |           |
|---|-----------|----------|-----------|
| C | 4.087157  | 1.306395 | -1.158285 |
| H | 4.146630  | 1.837091 | -2.099309 |
| C | 4.092265  | 2.015914 | 0.047603  |
| C | 4.107597  | 1.274916 | 1.228459  |
| H | 4.185499  | 1.773017 | 2.183856  |
| C | 3.956072  | 3.546944 | 0.034370  |
| C | 4.112196  | 4.163200 | 1.433079  |
| H | 3.364502  | 3.802982 | 2.137793  |
| H | 4.005442  | 5.246988 | 1.367698  |
| H | 5.097955  | 3.952891 | 1.850784  |
| C | 5.039235  | 4.172131 | -0.868796 |
| H | 6.037333  | 3.921209 | -0.506863 |
| H | 4.945342  | 5.259542 | -0.875269 |
| H | 4.962559  | 3.831272 | -1.900675 |
| C | 2.557805  | 3.934951 | -0.555711 |
| H | 2.516910  | 3.577306 | -1.587953 |
| H | 2.527939  | 5.028020 | -0.615689 |
| C | 1.296205  | 3.448164 | 0.176321  |
| H | 1.315370  | 2.358890 | 0.262000  |
| H | 1.283527  | 3.836492 | 1.198224  |
| C | 0.000000  | 3.879496 | -0.532305 |
| H | 0.000000  | 3.476401 | -1.550240 |
| H | 0.000000  | 4.969571 | -0.640960 |
| C | -1.296205 | 3.448164 | 0.176321  |
| H | -1.315371 | 2.358890 | 0.262000  |
| H | -1.283527 | 3.836492 | 1.198224  |
| C | -2.557805 | 3.934951 | -0.555711 |
| H | -2.516911 | 3.577306 | -1.587953 |
| H | -2.527940 | 5.028020 | -0.615689 |
| C | -3.956072 | 3.546943 | 0.034370  |
| C | -5.039235 | 4.172130 | -0.868796 |
| H | -4.962559 | 3.831271 | -1.900675 |
| H | -4.945343 | 5.259542 | -0.875269 |
| H | -6.037333 | 3.921208 | -0.506863 |
| C | -4.112197 | 4.163200 | 1.433079  |
| H | -5.097955 | 3.952891 | 1.850784  |
| H | -4.005442 | 5.246988 | 1.367698  |
| H | -3.364502 | 3.802981 | 2.137793  |

**1,1,8,8-Tetramethyl[8](2,11)teropyrenophane (1)** (E = -1932.5495958 Hartree):

|   |           |           |           |
|---|-----------|-----------|-----------|
| C | 4.580085  | 1.823593  | -0.024586 |
| C | 4.514468  | 1.096410  | 1.168674  |
| H | 4.635209  | 1.600908  | 2.117747  |
| C | 4.171680  | -0.255633 | 1.194969  |
| C | 3.875204  | -0.915452 | -0.025291 |
| C | 4.158564  | -0.250827 | -1.243593 |
| C | 4.505962  | 1.106192  | -1.217868 |
| H | 4.623640  | 1.610504  | -2.166069 |
| C | 3.946044  | -0.972509 | 2.415851  |
| H | 4.301896  | -0.546580 | 3.345493  |
| C | 3.211768  | -2.111494 | 2.423317  |
| H | 2.981224  | -2.583782 | 3.367109  |
| C | 2.624003  | -2.623076 | 1.217027  |
| C | 3.099884  | -2.110641 | -0.021689 |
| C | 2.604644  | -2.617305 | -1.254855 |
| C | 3.171769  | -2.097452 | -2.466329 |
| H | 2.922394  | -2.560498 | -3.409935 |
| C | 3.909661  | -0.959216 | -2.463501 |
| H | 4.248265  | -0.527763 | -3.397071 |
| C | 1.413116  | -3.354098 | 1.221557  |
| C | 0.716749  | -3.518905 | -0.005615 |
| C | 1.394231  | -3.351442 | -1.242406 |
| C | 0.695355  | -3.659339 | 2.426160  |
| H | 1.232580  | -3.789166 | 3.354509  |
| C | -0.659300 | -3.657080 | 2.436298  |
| H | -1.183172 | -3.785282 | 3.372528  |
| C | -1.394234 | -3.351441 | 1.242407  |
| C | -0.716752 | -3.518904 | 0.005615  |
| C | -1.413120 | -3.354098 | -1.221556 |
| C | -0.695359 | -3.659339 | -2.426160 |
| H | -1.232584 | -3.789166 | -3.354508 |
| C | 0.659296  | -3.657081 | -2.436297 |
| H | 1.183168  | -3.785284 | -3.372527 |
| C | -2.604647 | -2.617303 | 1.254855  |
| C | -3.099887 | -2.110639 | 0.021690  |
| C | -2.624006 | -2.623074 | -1.217026 |
| C | -3.171772 | -2.097450 | 2.466329  |
| H | -2.922398 | -2.560496 | 3.409935  |
| C | -3.909663 | -0.959213 | 2.463501  |
| H | -4.248266 | -0.527760 | 3.397071  |
| C | -4.158565 | -0.250824 | 1.243594  |
| C | -3.875206 | -0.915449 | 0.025292  |
| C | -4.171680 | -0.255629 | -1.194968 |
| C | -3.946045 | -0.972506 | -2.415850 |
| H | -4.301896 | -0.546576 | -3.345493 |
| C | -3.211771 | -2.111492 | -2.423316 |
| H | -2.981226 | -2.583779 | -3.367109 |

|   |           |          |           |
|---|-----------|----------|-----------|
| C | -4.505962 | 1.106196 | 1.217868  |
| H | -4.623639 | 1.610508 | 2.166070  |
| C | -4.580083 | 1.823597 | 0.024587  |
| C | -4.514467 | 1.096413 | -1.168674 |
| H | -4.635207 | 1.600912 | -2.117747 |
| C | -4.578955 | 3.360182 | -0.021238 |
| C | -5.665056 | 3.872388 | -0.989036 |
| H | -5.495589 | 3.541583 | -2.013147 |
| H | -5.677603 | 4.963570 | -0.997488 |
| H | -6.653120 | 3.525115 | -0.683574 |
| C | -4.847724 | 3.992653 | 1.352397  |
| H | -5.827059 | 3.702277 | 1.736420  |
| H | -4.836358 | 5.080129 | 1.263439  |
| H | -4.100131 | 3.719683 | 2.095139  |
| C | -3.186782 | 3.832607 | -0.562628 |
| H | -3.034642 | 3.363351 | -1.537863 |
| H | -3.254278 | 4.908607 | -0.753036 |
| C | -1.950855 | 3.564414 | 0.313022  |
| H | -2.000644 | 2.555535 | 0.729963  |
| H | -1.950662 | 4.248305 | 1.166460  |
| C | -0.622946 | 3.712197 | -0.450253 |
| H | -0.545952 | 2.898203 | -1.178008 |
| H | -0.635984 | 4.638250 | -1.034821 |
| C | 0.622950  | 3.712198 | 0.450251  |
| H | 0.545956  | 2.898206 | 1.178009  |
| H | 0.635990  | 4.638252 | 1.034817  |
| C | 1.950859  | 3.564412 | -0.313023 |
| H | 2.000648  | 2.555531 | -0.729961 |
| H | 1.950667  | 4.248299 | -1.166464 |
| C | 3.186787  | 3.832606 | 0.562625  |
| H | 3.034646  | 3.363354 | 1.537863  |
| H | 3.254284  | 4.908607 | 0.753030  |
| C | 4.578959  | 3.360178 | 0.021238  |
| C | 5.665061  | 3.872384 | 0.989035  |
| H | 5.495593  | 3.541582 | 2.013147  |
| H | 5.677611  | 4.963566 | 0.997484  |
| H | 6.653125  | 3.525108 | 0.683574  |
| C | 4.847730  | 3.992646 | -1.352398 |
| H | 5.827065  | 3.702269 | -1.736420 |
| H | 4.836363  | 5.080122 | -1.263443 |
| H | 4.100138  | 3.719673 | -2.095141 |

**1,1,9,9-Tetramethyl[9](2,11)teropyrenophane (29)** (E = -1971.8878607 Hartree)

|   |           |           |           |
|---|-----------|-----------|-----------|
| C | -5.060312 | 1.611372  | 0.041275  |
| C | -4.901319 | 0.921221  | -1.164580 |
| H | -5.062459 | 1.430524  | -2.105240 |
| C | -4.413480 | -0.385403 | -1.210103 |
| C | -4.064093 | -1.034288 | 0.002417  |
| C | -4.432740 | -0.428044 | 1.228350  |
| C | -4.925632 | 0.882704  | 1.222092  |
| H | -5.106228 | 1.353910  | 2.177344  |
| C | -4.100980 | -1.052026 | -2.439646 |
| H | -4.480998 | -0.642404 | -3.367057 |
| C | -3.266772 | -2.120135 | -2.456476 |
| H | -2.984517 | -2.551378 | -3.405688 |
| C | -2.655486 | -2.606281 | -1.252239 |
| C | -3.179691 | -2.150553 | -0.010960 |
| C | -2.661453 | -2.639491 | 1.219635  |
| C | -3.282734 | -2.190880 | 2.431723  |
| H | -3.003155 | -2.645309 | 3.370887  |
| C | -4.126552 | -1.128725 | 2.438825  |
| H | -4.515532 | -0.748834 | 3.375144  |
| C | -1.408204 | -3.273724 | -1.255061 |
| C | -0.716391 | -3.432371 | -0.023641 |
| C | -1.409273 | -3.302145 | 1.209514  |
| C | -0.677422 | -3.547727 | -2.457332 |
| H | -1.205866 | -3.663139 | -3.392410 |
| C | 0.677421  | -3.547727 | -2.457332 |
| H | 1.205864  | -3.663139 | -3.392410 |
| C | 1.408202  | -3.273725 | -1.255061 |
| C | 0.716389  | -3.432371 | -0.023641 |
| C | 1.409271  | -3.302145 | 1.209514  |
| C | 0.677840  | -3.596437 | 2.405595  |
| H | 1.205245  | -3.725808 | 3.339399  |
| C | -0.677842 | -3.596437 | 2.405595  |
| H | -1.205247 | -3.725807 | 3.339399  |
| C | 2.655484  | -2.606282 | -1.252239 |
| C | 3.179689  | -2.150554 | -0.010960 |
| C | 2.661451  | -2.639492 | 1.219635  |
| C | 3.266771  | -2.120137 | -2.456476 |
| H | 2.984516  | -2.551380 | -3.405688 |
| C | 4.100979  | -1.052027 | -2.439646 |
| H | 4.480998  | -0.642406 | -3.367057 |
| C | 4.413479  | -0.385405 | -1.210103 |
| C | 4.064092  | -1.034289 | 0.002417  |
| C | 4.432740  | -0.428046 | 1.228350  |
| C | 4.126550  | -1.128727 | 2.438825  |
| H | 4.515531  | -0.748835 | 3.375144  |
| C | 3.282732  | -2.190881 | 2.431723  |
| H | 3.003153  | -2.645309 | 3.370887  |

|   |           |          |           |
|---|-----------|----------|-----------|
| C | 4.901319  | 0.921220 | -1.164580 |
| H | 5.062460  | 1.430522 | -2.105240 |
| C | 5.060312  | 1.611370 | 0.041275  |
| C | 4.925632  | 0.882702 | 1.222092  |
| H | 5.106229  | 1.353908 | 2.177344  |
| C | 5.200332  | 3.140933 | 0.030419  |
| C | 5.514115  | 3.713204 | 1.421541  |
| H | 4.729821  | 3.505015 | 2.147505  |
| H | 5.618863  | 4.797132 | 1.355346  |
| H | 6.451097  | 3.314172 | 1.813653  |
| C | 6.332306  | 3.580910 | -0.918667 |
| H | 7.290718  | 3.171363 | -0.596202 |
| H | 6.415816  | 4.669115 | -0.927267 |
| H | 6.159271  | 3.259290 | -1.945040 |
| C | 1.291539  | 3.897859 | -0.426105 |
| H | 1.266826  | 3.515973 | -1.452059 |
| H | 1.324711  | 4.989295 | -0.510334 |
| C | 0.000001  | 3.478396 | 0.291693  |
| H | 0.000001  | 2.390067 | 0.408906  |
| H | 0.000002  | 3.890363 | 1.306283  |
| C | -1.291537 | 3.897861 | -0.426104 |
| H | -1.266822 | 3.515978 | -1.452060 |
| H | -1.324710 | 4.989297 | -0.510330 |
| C | -2.569958 | 3.392415 | 0.261729  |
| H | -2.501091 | 2.307410 | 0.367544  |
| H | -2.609492 | 3.795878 | 1.277367  |
| C | -3.856672 | 3.749838 | -0.498089 |
| H | -3.737509 | 3.440752 | -1.540077 |
| H | -3.974063 | 4.838304 | -0.516802 |
| C | -5.200330 | 3.140936 | 0.030419  |
| C | -6.332304 | 3.580913 | -0.918667 |
| H | -6.159270 | 3.259291 | -1.945040 |
| H | -6.415811 | 4.669118 | -0.927269 |
| H | -7.290716 | 3.171368 | -0.596201 |
| C | -5.514112 | 3.713206 | 1.421541  |
| H | -6.451094 | 3.314175 | 1.813653  |
| H | -5.618860 | 4.797135 | 1.355346  |
| H | -4.729818 | 3.505018 | 2.147505  |
| C | 2.569961  | 3.392417 | 0.261731  |
| H | 2.609494  | 3.795885 | 1.277367  |
| H | 2.501094  | 2.307412 | 0.367551  |
| C | 3.856674  | 3.749837 | -0.498089 |
| H | 3.974067  | 4.838303 | -0.516803 |
| H | 3.737511  | 3.440750 | -1.540077 |
